# Supplementary material
Source: PubMed Central journal article supplement (PMC10524264)
Supplement: NIHMS1902252-supplement-Table_Sup_1.pdf [file NIHMS1902252-supplement-Table_Sup_1.pdf]

## Data Dictionary Codebook

08/04/2022 2:02pm

| #                                  | Variable / Field Name            | Field Label<br><i>Field Note</i>                | Field Attributes (Field Type, Validation, Choices, Calculations, etc.)                                                                                                                                                                                                                                                                                                                                                                                 |   |                            |   |                              |   |                  |   |                                  |   |                       |   |     |   |        |    |      |   |         |
|------------------------------------|----------------------------------|-------------------------------------------------|--------------------------------------------------------------------------------------------------------------------------------------------------------------------------------------------------------------------------------------------------------------------------------------------------------------------------------------------------------------------------------------------------------------------------------------------------------|---|----------------------------|---|------------------------------|---|------------------|---|----------------------------------|---|-----------------------|---|-----|---|--------|----|------|---|---------|
| <b>Instrument: Spasms (spasms)</b> |                                  |                                                 |                                                                                                                                                                                                                                                                                                                                                                                                                                                        |   |                            |   |                              |   |                  |   |                                  |   |                       |   |     |   |        |    |      |   |         |
| 1                                  | [ <a href="#">studyid</a> ]      | Study ID                                        | text                                                                                                                                                                                                                                                                                                                                                                                                                                                   |   |                            |   |                              |   |                  |   |                                  |   |                       |   |     |   |        |    |      |   |         |
| 2                                  | [ <a href="#">guid</a> ]         | GUID                                            | text                                                                                                                                                                                                                                                                                                                                                                                                                                                   |   |                            |   |                              |   |                  |   |                                  |   |                       |   |     |   |        |    |      |   |         |
| 3                                  | [ <a href="#">site</a> ]         | Site                                            | radio <table border="1"> <tr><td>1</td><td>Boston Children's Hospital</td></tr> <tr><td>2</td><td>Children's Hospital Colorado</td></tr> <tr><td>3</td><td>Cleveland Clinic</td></tr> <tr><td>5</td><td>Children's Hospital Philadelphia</td></tr> <tr><td>6</td><td>Washington University</td></tr> <tr><td>7</td><td>NYU</td></tr> <tr><td>8</td><td>Baylor</td></tr> <tr><td>10</td><td>UCLA</td></tr> <tr><td>9</td><td>Unknown</td></tr> </table> | 1 | Boston Children's Hospital | 2 | Children's Hospital Colorado | 3 | Cleveland Clinic | 5 | Children's Hospital Philadelphia | 6 | Washington University | 7 | NYU | 8 | Baylor | 10 | UCLA | 9 | Unknown |
| 1                                  | Boston Children's Hospital       |                                                 |                                                                                                                                                                                                                                                                                                                                                                                                                                                        |   |                            |   |                              |   |                  |   |                                  |   |                       |   |     |   |        |    |      |   |         |
| 2                                  | Children's Hospital Colorado     |                                                 |                                                                                                                                                                                                                                                                                                                                                                                                                                                        |   |                            |   |                              |   |                  |   |                                  |   |                       |   |     |   |        |    |      |   |         |
| 3                                  | Cleveland Clinic                 |                                                 |                                                                                                                                                                                                                                                                                                                                                                                                                                                        |   |                            |   |                              |   |                  |   |                                  |   |                       |   |     |   |        |    |      |   |         |
| 5                                  | Children's Hospital Philadelphia |                                                 |                                                                                                                                                                                                                                                                                                                                                                                                                                                        |   |                            |   |                              |   |                  |   |                                  |   |                       |   |     |   |        |    |      |   |         |
| 6                                  | Washington University            |                                                 |                                                                                                                                                                                                                                                                                                                                                                                                                                                        |   |                            |   |                              |   |                  |   |                                  |   |                       |   |     |   |        |    |      |   |         |
| 7                                  | NYU                              |                                                 |                                                                                                                                                                                                                                                                                                                                                                                                                                                        |   |                            |   |                              |   |                  |   |                                  |   |                       |   |     |   |        |    |      |   |         |
| 8                                  | Baylor                           |                                                 |                                                                                                                                                                                                                                                                                                                                                                                                                                                        |   |                            |   |                              |   |                  |   |                                  |   |                       |   |     |   |        |    |      |   |         |
| 10                                 | UCLA                             |                                                 |                                                                                                                                                                                                                                                                                                                                                                                                                                                        |   |                            |   |                              |   |                  |   |                                  |   |                       |   |     |   |        |    |      |   |         |
| 9                                  | Unknown                          |                                                 |                                                                                                                                                                                                                                                                                                                                                                                                                                                        |   |                            |   |                              |   |                  |   |                                  |   |                       |   |     |   |        |    |      |   |         |
| 4                                  | [ <a href="#">site_other</a> ]   | Was the patient seen at any of the other sites? | radio <table border="1"> <tr><td>1</td><td>Yes</td></tr> <tr><td>2</td><td>No</td></tr> <tr><td>9</td><td>Unknown</td></tr> </table>                                                                                                                                                                                                                                                                                                                   | 1 | Yes                        | 2 | No                           | 9 | Unknown          |   |                                  |   |                       |   |     |   |        |    |      |   |         |
| 1                                  | Yes                              |                                                 |                                                                                                                                                                                                                                                                                                                                                                                                                                                        |   |                            |   |                              |   |                  |   |                                  |   |                       |   |     |   |        |    |      |   |         |
| 2                                  | No                               |                                                 |                                                                                                                                                                                                                                                                                                                                                                                                                                                        |   |                            |   |                              |   |                  |   |                                  |   |                       |   |     |   |        |    |      |   |         |
| 9                                  | Unknown                          |                                                 |                                                                                                                                                                                                                                                                                                                                                                                                                                                        |   |                            |   |                              |   |                  |   |                                  |   |                       |   |     |   |        |    |      |   |         |

|    |                                                                        |                                                                                                                                 |                                                                                                                                                                                                                                                                                                                                                                                     |   |                            |   |                              |   |                  |   |                                  |   |                       |   |     |   |        |
|----|------------------------------------------------------------------------|---------------------------------------------------------------------------------------------------------------------------------|-------------------------------------------------------------------------------------------------------------------------------------------------------------------------------------------------------------------------------------------------------------------------------------------------------------------------------------------------------------------------------------|---|----------------------------|---|------------------------------|---|------------------|---|----------------------------------|---|-----------------------|---|-----|---|--------|
| 5  | [ <b>other_name</b> ]<br>Show the field ONLY if:<br>[site_other] = '1' | If yes, which one?                                                                                                              | radio<br><table border="1"> <tr><td>1</td><td>Boston Children's Hospital</td></tr> <tr><td>2</td><td>Children's Hospital Colorado</td></tr> <tr><td>3</td><td>Cleveland Clinic</td></tr> <tr><td>5</td><td>Children's Hospital Philadelphia</td></tr> <tr><td>6</td><td>Washington University</td></tr> <tr><td>7</td><td>NYU</td></tr> <tr><td>8</td><td>Baylor</td></tr> </table> | 1 | Boston Children's Hospital | 2 | Children's Hospital Colorado | 3 | Cleveland Clinic | 5 | Children's Hospital Philadelphia | 6 | Washington University | 7 | NYU | 8 | Baylor |
| 1  | Boston Children's Hospital                                             |                                                                                                                                 |                                                                                                                                                                                                                                                                                                                                                                                     |   |                            |   |                              |   |                  |   |                                  |   |                       |   |     |   |        |
| 2  | Children's Hospital Colorado                                           |                                                                                                                                 |                                                                                                                                                                                                                                                                                                                                                                                     |   |                            |   |                              |   |                  |   |                                  |   |                       |   |     |   |        |
| 3  | Cleveland Clinic                                                       |                                                                                                                                 |                                                                                                                                                                                                                                                                                                                                                                                     |   |                            |   |                              |   |                  |   |                                  |   |                       |   |     |   |        |
| 5  | Children's Hospital Philadelphia                                       |                                                                                                                                 |                                                                                                                                                                                                                                                                                                                                                                                     |   |                            |   |                              |   |                  |   |                                  |   |                       |   |     |   |        |
| 6  | Washington University                                                  |                                                                                                                                 |                                                                                                                                                                                                                                                                                                                                                                                     |   |                            |   |                              |   |                  |   |                                  |   |                       |   |     |   |        |
| 7  | NYU                                                                    |                                                                                                                                 |                                                                                                                                                                                                                                                                                                                                                                                     |   |                            |   |                              |   |                  |   |                                  |   |                       |   |     |   |        |
| 8  | Baylor                                                                 |                                                                                                                                 |                                                                                                                                                                                                                                                                                                                                                                                     |   |                            |   |                              |   |                  |   |                                  |   |                       |   |     |   |        |
| 6  | [ <b>gender</b> ]                                                      | Sex                                                                                                                             | radio<br><table border="1"> <tr><td>1</td><td>Female</td></tr> <tr><td>2</td><td>Male</td></tr> </table>                                                                                                                                                                                                                                                                            | 1 | Female                     | 2 | Male                         |   |                  |   |                                  |   |                       |   |     |   |        |
| 1  | Female                                                                 |                                                                                                                                 |                                                                                                                                                                                                                                                                                                                                                                                     |   |                            |   |                              |   |                  |   |                                  |   |                       |   |     |   |        |
| 2  | Male                                                                   |                                                                                                                                 |                                                                                                                                                                                                                                                                                                                                                                                     |   |                            |   |                              |   |                  |   |                                  |   |                       |   |     |   |        |
| 7  | [ <b>sz_onset</b> ]                                                    | Age of seizure onset (weeks):<br><i>integer</i>                                                                                 | text                                                                                                                                                                                                                                                                                                                                                                                |   |                            |   |                              |   |                  |   |                                  |   |                       |   |     |   |        |
| 8  | [ <b>spasms_onset</b> ]                                                | Age of spasms onset (months):<br><i>integer</i>                                                                                 | text                                                                                                                                                                                                                                                                                                                                                                                |   |                            |   |                              |   |                  |   |                                  |   |                       |   |     |   |        |
| 9  | [ <b>spasms_onset_yr</b> ]                                             | Year of spasms onset (2012 or beyond):                                                                                          | text                                                                                                                                                                                                                                                                                                                                                                                |   |                            |   |                              |   |                  |   |                                  |   |                       |   |     |   |        |
| 10 | [ <b>m3chartreviewordeath</b> ]                                        | Date of last follow-up?<br><i>(MM/DD/YYYY)</i>                                                                                  | text (date_mdy)                                                                                                                                                                                                                                                                                                                                                                     |   |                            |   |                              |   |                  |   |                                  |   |                       |   |     |   |        |
| 11 | [ <b>age_fu</b> ]                                                      | Age at last follow up (years)?<br>-- --                                                                                         | text                                                                                                                                                                                                                                                                                                                                                                                |   |                            |   |                              |   |                  |   |                                  |   |                       |   |     |   |        |
| 12 | [ <b>sz_con</b> ]                                                      | Are seizures controlled (at last follow up)?<br><i>Only answer "Yes" if seizure free of ALL seizure types at last follow up</i> | radio<br><table border="1"> <tr><td>1</td><td>Yes</td></tr> <tr><td>2</td><td>No</td></tr> <tr><td>9</td><td>Unknown</td></tr> </table>                                                                                                                                                                                                                                             | 1 | Yes                        | 2 | No                           | 9 | Unknown          |   |                                  |   |                       |   |     |   |        |
| 1  | Yes                                                                    |                                                                                                                                 |                                                                                                                                                                                                                                                                                                                                                                                     |   |                            |   |                              |   |                  |   |                                  |   |                       |   |     |   |        |
| 2  | No                                                                     |                                                                                                                                 |                                                                                                                                                                                                                                                                                                                                                                                     |   |                            |   |                              |   |                  |   |                                  |   |                       |   |     |   |        |
| 9  | Unknown                                                                |                                                                                                                                 |                                                                                                                                                                                                                                                                                                                                                                                     |   |                            |   |                              |   |                  |   |                                  |   |                       |   |     |   |        |
| 13 | [ <b>cdk15_var</b> ]                                                   | Does the patient have a CDKL5 variant?                                                                                          | radio<br><table border="1"> <tr><td>1</td><td>Yes</td></tr> <tr><td>2</td><td>No</td></tr> </table>                                                                                                                                                                                                                                                                                 | 1 | Yes                        | 2 | No                           |   |                  |   |                                  |   |                       |   |     |   |        |
| 1  | Yes                                                                    |                                                                                                                                 |                                                                                                                                                                                                                                                                                                                                                                                     |   |                            |   |                              |   |                  |   |                                  |   |                       |   |     |   |        |
| 2  | No                                                                     |                                                                                                                                 |                                                                                                                                                                                                                                                                                                                                                                                     |   |                            |   |                              |   |                  |   |                                  |   |                       |   |     |   |        |

|    |                                                                        |                                                                                                        |                                                                                                                                                                                                                                                                                                                                                                                                                                                                                                                                                                                   |   |         |                                                      |      |         |                                      |   |         |        |   |         |                                                      |   |         |                        |   |         |      |   |         |         |
|----|------------------------------------------------------------------------|--------------------------------------------------------------------------------------------------------|-----------------------------------------------------------------------------------------------------------------------------------------------------------------------------------------------------------------------------------------------------------------------------------------------------------------------------------------------------------------------------------------------------------------------------------------------------------------------------------------------------------------------------------------------------------------------------------|---|---------|------------------------------------------------------|------|---------|--------------------------------------|---|---------|--------|---|---------|------------------------------------------------------|---|---------|------------------------|---|---------|------|---|---------|---------|
| 14 | [ <b>cdna_var</b> ]<br>Show the field ONLY if:<br>[cdkl5_var] = '1'    | If yes, nucleotide change (cDNA):<br><i>e.g. c.634G&gt;A</i>                                           | text                                                                                                                                                                                                                                                                                                                                                                                                                                                                                                                                                                              |   |         |                                                      |      |         |                                      |   |         |        |   |         |                                                      |   |         |                        |   |         |      |   |         |         |
| 15 | [ <b>protein_var</b> ]<br>Show the field ONLY if:<br>[cdkl5_var] = '1' | Protein change:<br><i>e.g. p.Arg214Gly</i>                                                             | text                                                                                                                                                                                                                                                                                                                                                                                                                                                                                                                                                                              |   |         |                                                      |      |         |                                      |   |         |        |   |         |                                                      |   |         |                        |   |         |      |   |         |         |
| 16 | [ <b>trans_id</b> ]<br>Show the field ONLY if:<br>[cdkl5_var] = '1'    | Transcript ID: NM<br><i>e.g. NM_003159.2 (or n/a)</i>                                                  | text                                                                                                                                                                                                                                                                                                                                                                                                                                                                                                                                                                              |   |         |                                                      |      |         |                                      |   |         |        |   |         |                                                      |   |         |                        |   |         |      |   |         |         |
| 17 | [ <b>del_coord</b> ]<br>Show the field ONLY if:<br>[cdkl5_var] = '1'   | Or deletion coordinates ChrX:<br><i>e.g. 16,308,217-18,600,035 (or n/a)</i>                            | text                                                                                                                                                                                                                                                                                                                                                                                                                                                                                                                                                                              |   |         |                                                      |      |         |                                      |   |         |        |   |         |                                                      |   |         |                        |   |         |      |   |         |         |
| 18 | [ <b>ref_gen</b> ]<br>Show the field ONLY if:<br>[cdkl5_var] = '1'     | Reference genome (in methods of genetics report):<br><i>in methods of genetics report</i>              | radio<br><table border="1"> <tr> <td>1</td> <td>hg18</td> </tr> <tr> <td>2</td> <td>hg19</td> </tr> <tr> <td>3</td> <td>hg38</td> </tr> </table>                                                                                                                                                                                                                                                                                                                                                                                                                                  | 1 | hg18    | 2                                                    | hg19 | 3       | hg38                                 |   |         |        |   |         |                                                      |   |         |                        |   |         |      |   |         |         |
| 1  | hg18                                                                   |                                                                                                        |                                                                                                                                                                                                                                                                                                                                                                                                                                                                                                                                                                                   |   |         |                                                      |      |         |                                      |   |         |        |   |         |                                                      |   |         |                        |   |         |      |   |         |         |
| 2  | hg19                                                                   |                                                                                                        |                                                                                                                                                                                                                                                                                                                                                                                                                                                                                                                                                                                   |   |         |                                                      |      |         |                                      |   |         |        |   |         |                                                      |   |         |                        |   |         |      |   |         |         |
| 3  | hg38                                                                   |                                                                                                        |                                                                                                                                                                                                                                                                                                                                                                                                                                                                                                                                                                                   |   |         |                                                      |      |         |                                      |   |         |        |   |         |                                                      |   |         |                        |   |         |      |   |         |         |
| 19 | [ <b>risk</b> ]                                                        | Any other risk factors for epilepsy:                                                                   | checkbox<br><table border="1"> <tr> <td>1</td> <td>risk__1</td> <td>Family history of epilepsy in first degree relatives</td> </tr> <tr> <td>2</td> <td>risk__2</td> <td>Malformation of cortical development</td> </tr> <tr> <td>3</td> <td>risk__3</td> <td>Trauma</td> </tr> <tr> <td>4</td> <td>risk__4</td> <td>Vascular event (e.g. ischemic or hemorrhagic stroke)</td> </tr> <tr> <td>5</td> <td>risk__5</td> <td>Other genetic variants</td> </tr> <tr> <td>6</td> <td>risk__6</td> <td>None</td> </tr> <tr> <td>7</td> <td>risk__7</td> <td>Unknown</td> </tr> </table> | 1 | risk__1 | Family history of epilepsy in first degree relatives | 2    | risk__2 | Malformation of cortical development | 3 | risk__3 | Trauma | 4 | risk__4 | Vascular event (e.g. ischemic or hemorrhagic stroke) | 5 | risk__5 | Other genetic variants | 6 | risk__6 | None | 7 | risk__7 | Unknown |
| 1  | risk__1                                                                | Family history of epilepsy in first degree relatives                                                   |                                                                                                                                                                                                                                                                                                                                                                                                                                                                                                                                                                                   |   |         |                                                      |      |         |                                      |   |         |        |   |         |                                                      |   |         |                        |   |         |      |   |         |         |
| 2  | risk__2                                                                | Malformation of cortical development                                                                   |                                                                                                                                                                                                                                                                                                                                                                                                                                                                                                                                                                                   |   |         |                                                      |      |         |                                      |   |         |        |   |         |                                                      |   |         |                        |   |         |      |   |         |         |
| 3  | risk__3                                                                | Trauma                                                                                                 |                                                                                                                                                                                                                                                                                                                                                                                                                                                                                                                                                                                   |   |         |                                                      |      |         |                                      |   |         |        |   |         |                                                      |   |         |                        |   |         |      |   |         |         |
| 4  | risk__4                                                                | Vascular event (e.g. ischemic or hemorrhagic stroke)                                                   |                                                                                                                                                                                                                                                                                                                                                                                                                                                                                                                                                                                   |   |         |                                                      |      |         |                                      |   |         |        |   |         |                                                      |   |         |                        |   |         |      |   |         |         |
| 5  | risk__5                                                                | Other genetic variants                                                                                 |                                                                                                                                                                                                                                                                                                                                                                                                                                                                                                                                                                                   |   |         |                                                      |      |         |                                      |   |         |        |   |         |                                                      |   |         |                        |   |         |      |   |         |         |
| 6  | risk__6                                                                | None                                                                                                   |                                                                                                                                                                                                                                                                                                                                                                                                                                                                                                                                                                                   |   |         |                                                      |      |         |                                      |   |         |        |   |         |                                                      |   |         |                        |   |         |      |   |         |         |
| 7  | risk__7                                                                | Unknown                                                                                                |                                                                                                                                                                                                                                                                                                                                                                                                                                                                                                                                                                                   |   |         |                                                      |      |         |                                      |   |         |        |   |         |                                                      |   |         |                        |   |         |      |   |         |         |
| 20 | [ <b>var_other</b> ]<br>Show the field ONLY if:<br>[risk(5)] = '1'     | If other genetic variant, explain:<br><i>Gene; cDNA; protein, OR ChrX coordinates, x "copy number"</i> | text                                                                                                                                                                                                                                                                                                                                                                                                                                                                                                                                                                              |   |         |                                                      |      |         |                                      |   |         |        |   |         |                                                      |   |         |                        |   |         |      |   |         |         |

|    |                                                                             |                                                                                                         |                                                                                                                                                                                                                                                                                                                                                                                                    |   |                 |                |         |                 |                         |   |                 |       |        |                 |        |   |                 |                                    |
|----|-----------------------------------------------------------------------------|---------------------------------------------------------------------------------------------------------|----------------------------------------------------------------------------------------------------------------------------------------------------------------------------------------------------------------------------------------------------------------------------------------------------------------------------------------------------------------------------------------------------|---|-----------------|----------------|---------|-----------------|-------------------------|---|-----------------|-------|--------|-----------------|--------|---|-----------------|------------------------------------|
| 21 | [ <b>control_etiology</b> ]<br>Show the field ONLY if:<br>[cdkl5_var] = "2" | If control patient, what is the etiology [NISC cohort only]?                                            | radio<br><table border="1"> <tr><td>1</td><td>Structural</td></tr> <tr><td>2</td><td>Genetic</td></tr> <tr><td>3</td><td>Infectious</td></tr> <tr><td>4</td><td>Metabolic</td></tr> <tr><td>5</td><td>Immune</td></tr> <tr><td>6</td><td>Other</td></tr> <tr><td>7</td><td>Unknown</td></tr> </table>                                                                                              | 1 | Structural      | 2              | Genetic | 3               | Infectious              | 4 | Metabolic       | 5     | Immune | 6               | Other  | 7 | Unknown         |                                    |
| 1  | Structural                                                                  |                                                                                                         |                                                                                                                                                                                                                                                                                                                                                                                                    |   |                 |                |         |                 |                         |   |                 |       |        |                 |        |   |                 |                                    |
| 2  | Genetic                                                                     |                                                                                                         |                                                                                                                                                                                                                                                                                                                                                                                                    |   |                 |                |         |                 |                         |   |                 |       |        |                 |        |   |                 |                                    |
| 3  | Infectious                                                                  |                                                                                                         |                                                                                                                                                                                                                                                                                                                                                                                                    |   |                 |                |         |                 |                         |   |                 |       |        |                 |        |   |                 |                                    |
| 4  | Metabolic                                                                   |                                                                                                         |                                                                                                                                                                                                                                                                                                                                                                                                    |   |                 |                |         |                 |                         |   |                 |       |        |                 |        |   |                 |                                    |
| 5  | Immune                                                                      |                                                                                                         |                                                                                                                                                                                                                                                                                                                                                                                                    |   |                 |                |         |                 |                         |   |                 |       |        |                 |        |   |                 |                                    |
| 6  | Other                                                                       |                                                                                                         |                                                                                                                                                                                                                                                                                                                                                                                                    |   |                 |                |         |                 |                         |   |                 |       |        |                 |        |   |                 |                                    |
| 7  | Unknown                                                                     |                                                                                                         |                                                                                                                                                                                                                                                                                                                                                                                                    |   |                 |                |         |                 |                         |   |                 |       |        |                 |        |   |                 |                                    |
| 22 | [ <b>baseline_cause</b> ]<br>Show the field ONLY if:<br>[cdkl5_var] = "2"   | Etiology, additional information [NISC cohort only]:                                                    | text                                                                                                                                                                                                                                                                                                                                                                                               |   |                 |                |         |                 |                         |   |                 |       |        |                 |        |   |                 |                                    |
| 23 | [ <b>preeeg_av</b> ]                                                        | Section Header: <i>EEG at spasms onset prior to treatment</i><br>EEG at spasm onset prior to treatment? | radio<br><table border="1"> <tr><td>1</td><td>Yes</td></tr> <tr><td>2</td><td>No</td></tr> <tr><td>9</td><td>Unknown</td></tr> </table>                                                                                                                                                                                                                                                            | 1 | Yes             | 2              | No      | 9               | Unknown                 |   |                 |       |        |                 |        |   |                 |                                    |
| 1  | Yes                                                                         |                                                                                                         |                                                                                                                                                                                                                                                                                                                                                                                                    |   |                 |                |         |                 |                         |   |                 |       |        |                 |        |   |                 |                                    |
| 2  | No                                                                          |                                                                                                         |                                                                                                                                                                                                                                                                                                                                                                                                    |   |                 |                |         |                 |                         |   |                 |       |        |                 |        |   |                 |                                    |
| 9  | Unknown                                                                     |                                                                                                         |                                                                                                                                                                                                                                                                                                                                                                                                    |   |                 |                |         |                 |                         |   |                 |       |        |                 |        |   |                 |                                    |
| 24 | [ <b>preeeg_spasm</b> ]<br>Show the field ONLY if:<br>[preeeg_av] = '1'     | EEG features:<br><i>select all that apply</i>                                                           | checkbox<br><table border="1"> <tr><td>2</td><td>preeeg_spasm__2</td><td>Hypsarrhythmia</td></tr> <tr><td>3</td><td>preeeg_spasm__3</td><td>Modified hypsarrhythmia</td></tr> <tr><td>4</td><td>preeeg_spasm__4</td><td>Other</td></tr> <tr><td>5</td><td>preeeg_spasm__5</td><td>Normal</td></tr> <tr><td>6</td><td>preeeg_spasm__6</td><td>Any abnormality [NISC cohort only]</td></tr> </table> | 2 | preeeg_spasm__2 | Hypsarrhythmia | 3       | preeeg_spasm__3 | Modified hypsarrhythmia | 4 | preeeg_spasm__4 | Other | 5      | preeeg_spasm__5 | Normal | 6 | preeeg_spasm__6 | Any abnormality [NISC cohort only] |
| 2  | preeeg_spasm__2                                                             | Hypsarrhythmia                                                                                          |                                                                                                                                                                                                                                                                                                                                                                                                    |   |                 |                |         |                 |                         |   |                 |       |        |                 |        |   |                 |                                    |
| 3  | preeeg_spasm__3                                                             | Modified hypsarrhythmia                                                                                 |                                                                                                                                                                                                                                                                                                                                                                                                    |   |                 |                |         |                 |                         |   |                 |       |        |                 |        |   |                 |                                    |
| 4  | preeeg_spasm__4                                                             | Other                                                                                                   |                                                                                                                                                                                                                                                                                                                                                                                                    |   |                 |                |         |                 |                         |   |                 |       |        |                 |        |   |                 |                                    |
| 5  | preeeg_spasm__5                                                             | Normal                                                                                                  |                                                                                                                                                                                                                                                                                                                                                                                                    |   |                 |                |         |                 |                         |   |                 |       |        |                 |        |   |                 |                                    |
| 6  | preeeg_spasm__6                                                             | Any abnormality [NISC cohort only]                                                                      |                                                                                                                                                                                                                                                                                                                                                                                                    |   |                 |                |         |                 |                         |   |                 |       |        |                 |        |   |                 |                                    |

|    |                                                                                                                  |                                                             |                                                                                                                                                                                                                                                                                                                                                                                                                                                                                                                    |   |                 |                   |                                                                |                 |                     |   |                 |               |             |                 |                               |   |                                   |              |               |                 |                         |
|----|------------------------------------------------------------------------------------------------------------------|-------------------------------------------------------------|--------------------------------------------------------------------------------------------------------------------------------------------------------------------------------------------------------------------------------------------------------------------------------------------------------------------------------------------------------------------------------------------------------------------------------------------------------------------------------------------------------------------|---|-----------------|-------------------|----------------------------------------------------------------|-----------------|---------------------|---|-----------------|---------------|-------------|-----------------|-------------------------------|---|-----------------------------------|--------------|---------------|-----------------|-------------------------|
| 25 | <p>[preeeg_other]</p> <p>Show the field ONLY if:<br/>[preeeg_spasm(4)] = '1'</p>                                 | <p>If other, check all that apply:</p>                      | <p>checkbox</p> <table border="1"> <tr> <td>1</td> <td>preeeg_other__1</td> <td>Burst suppression</td> </tr> <tr> <td>2</td> <td>preeeg_other__2</td> <td>Generalized slowing</td> </tr> <tr> <td>3</td> <td>preeeg_other__3</td> <td>Focal slowing</td> </tr> <tr> <td>4</td> <td>preeeg_other__4</td> <td>Normal PDR and sleep features</td> </tr> <tr> <td>5</td> <td>preeeg_other__5</td> <td>Abnormal PDR</td> </tr> <tr> <td>6</td> <td>preeeg_other__6</td> <td>Abnormal sleep features</td> </tr> </table> | 1 | preeeg_other__1 | Burst suppression | 2                                                              | preeeg_other__2 | Generalized slowing | 3 | preeeg_other__3 | Focal slowing | 4           | preeeg_other__4 | Normal PDR and sleep features | 5 | preeeg_other__5                   | Abnormal PDR | 6             | preeeg_other__6 | Abnormal sleep features |
| 1  | preeeg_other__1                                                                                                  | Burst suppression                                           |                                                                                                                                                                                                                                                                                                                                                                                                                                                                                                                    |   |                 |                   |                                                                |                 |                     |   |                 |               |             |                 |                               |   |                                   |              |               |                 |                         |
| 2  | preeeg_other__2                                                                                                  | Generalized slowing                                         |                                                                                                                                                                                                                                                                                                                                                                                                                                                                                                                    |   |                 |                   |                                                                |                 |                     |   |                 |               |             |                 |                               |   |                                   |              |               |                 |                         |
| 3  | preeeg_other__3                                                                                                  | Focal slowing                                               |                                                                                                                                                                                                                                                                                                                                                                                                                                                                                                                    |   |                 |                   |                                                                |                 |                     |   |                 |               |             |                 |                               |   |                                   |              |               |                 |                         |
| 4  | preeeg_other__4                                                                                                  | Normal PDR and sleep features                               |                                                                                                                                                                                                                                                                                                                                                                                                                                                                                                                    |   |                 |                   |                                                                |                 |                     |   |                 |               |             |                 |                               |   |                                   |              |               |                 |                         |
| 5  | preeeg_other__5                                                                                                  | Abnormal PDR                                                |                                                                                                                                                                                                                                                                                                                                                                                                                                                                                                                    |   |                 |                   |                                                                |                 |                     |   |                 |               |             |                 |                               |   |                                   |              |               |                 |                         |
| 6  | preeeg_other__6                                                                                                  | Abnormal sleep features                                     |                                                                                                                                                                                                                                                                                                                                                                                                                                                                                                                    |   |                 |                   |                                                                |                 |                     |   |                 |               |             |                 |                               |   |                                   |              |               |                 |                         |
| 26 | <p>[preeeg_other_2]</p> <p>Show the field ONLY if:<br/>[preeeg_spasm(4)] = '1'</p>                               | <p>If other, add any relevant notes:</p>                    | <p>notes</p>                                                                                                                                                                                                                                                                                                                                                                                                                                                                                                       |   |                 |                   |                                                                |                 |                     |   |                 |               |             |                 |                               |   |                                   |              |               |                 |                         |
| 27 | <p>[preeeg_interictal]</p> <p>Show the field ONLY if:<br/>[preeeg_spasm(4)] = '1' or [preeeg_spasm(6)] = '1'</p> | <p>Do any of the following interictal activities apply:</p> | <p>radio</p> <table border="1"> <tr> <td>0</td> <td>None</td> </tr> <tr> <td>1</td> <td>Multifocal (3 or more foci, independent from both hemispheres)</td> </tr> <tr> <td>3</td> <td>Single focus</td> </tr> <tr> <td>4</td> <td>Two foci only</td> </tr> <tr> <td>5</td> <td>Hemispheric</td> </tr> <tr> <td>6</td> <td>Generalized</td> </tr> <tr> <td>7</td> <td>Generalized plus focal/multifocal</td> </tr> <tr> <td>9</td> <td>Not available</td> </tr> </table>                                            | 0 | None            | 1                 | Multifocal (3 or more foci, independent from both hemispheres) | 3               | Single focus        | 4 | Two foci only   | 5             | Hemispheric | 6               | Generalized                   | 7 | Generalized plus focal/multifocal | 9            | Not available |                 |                         |
| 0  | None                                                                                                             |                                                             |                                                                                                                                                                                                                                                                                                                                                                                                                                                                                                                    |   |                 |                   |                                                                |                 |                     |   |                 |               |             |                 |                               |   |                                   |              |               |                 |                         |
| 1  | Multifocal (3 or more foci, independent from both hemispheres)                                                   |                                                             |                                                                                                                                                                                                                                                                                                                                                                                                                                                                                                                    |   |                 |                   |                                                                |                 |                     |   |                 |               |             |                 |                               |   |                                   |              |               |                 |                         |
| 3  | Single focus                                                                                                     |                                                             |                                                                                                                                                                                                                                                                                                                                                                                                                                                                                                                    |   |                 |                   |                                                                |                 |                     |   |                 |               |             |                 |                               |   |                                   |              |               |                 |                         |
| 4  | Two foci only                                                                                                    |                                                             |                                                                                                                                                                                                                                                                                                                                                                                                                                                                                                                    |   |                 |                   |                                                                |                 |                     |   |                 |               |             |                 |                               |   |                                   |              |               |                 |                         |
| 5  | Hemispheric                                                                                                      |                                                             |                                                                                                                                                                                                                                                                                                                                                                                                                                                                                                                    |   |                 |                   |                                                                |                 |                     |   |                 |               |             |                 |                               |   |                                   |              |               |                 |                         |
| 6  | Generalized                                                                                                      |                                                             |                                                                                                                                                                                                                                                                                                                                                                                                                                                                                                                    |   |                 |                   |                                                                |                 |                     |   |                 |               |             |                 |                               |   |                                   |              |               |                 |                         |
| 7  | Generalized plus focal/multifocal                                                                                |                                                             |                                                                                                                                                                                                                                                                                                                                                                                                                                                                                                                    |   |                 |                   |                                                                |                 |                     |   |                 |               |             |                 |                               |   |                                   |              |               |                 |                         |
| 9  | Not available                                                                                                    |                                                             |                                                                                                                                                                                                                                                                                                                                                                                                                                                                                                                    |   |                 |                   |                                                                |                 |                     |   |                 |               |             |                 |                               |   |                                   |              |               |                 |                         |
| 28 | <p>[preeeg_edata]</p> <p>Show the field ONLY if:<br/>[preeeg_av] = '1'</p>                                       | <p>Is the primary (raw) EEG data available for review?</p>  | <p>radio</p> <table border="1"> <tr> <td>1</td> <td>Yes</td> </tr> <tr> <td>2</td> <td>No</td> </tr> </table>                                                                                                                                                                                                                                                                                                                                                                                                      | 1 | Yes             | 2                 | No                                                             |                 |                     |   |                 |               |             |                 |                               |   |                                   |              |               |                 |                         |
| 1  | Yes                                                                                                              |                                                             |                                                                                                                                                                                                                                                                                                                                                                                                                                                                                                                    |   |                 |                   |                                                                |                 |                     |   |                 |               |             |                 |                               |   |                                   |              |               |                 |                         |
| 2  | No                                                                                                               |                                                             |                                                                                                                                                                                                                                                                                                                                                                                                                                                                                                                    |   |                 |                   |                                                                |                 |                     |   |                 |               |             |                 |                               |   |                                   |              |               |                 |                         |

|    |                                                                                            |                                                                                                                                                                                                                                                                                     |                                                                                                                                                                                                                                                     |   |      |   |   |   |   |   |   |   |     |
|----|--------------------------------------------------------------------------------------------|-------------------------------------------------------------------------------------------------------------------------------------------------------------------------------------------------------------------------------------------------------------------------------------|-----------------------------------------------------------------------------------------------------------------------------------------------------------------------------------------------------------------------------------------------------|---|------|---|---|---|---|---|---|---|-----|
| 29 | <p>[ <b>b_score</b> ]</p> <p>Show the field ONLY if:<br/>[preeeg_edata] = '1'</p>          | <p>If primary EEG data is available for review, please provide the BASED score for the EEG at spasms onset (prior to treatment). Review score as outlined below (BASED score description guide), based on the most severely abnormal 5 minute sleep epoch available from files:</p> | <p>radio</p> <table border="1" data-bbox="1356 123 1465 388"> <tr> <td>2</td> <td>&lt; =2</td> </tr> <tr> <td>3</td> <td>3</td> </tr> <tr> <td>4</td> <td>4</td> </tr> <tr> <td>5</td> <td>5</td> </tr> <tr> <td>9</td> <td>N/A</td> </tr> </table> | 2 | < =2 | 3 | 3 | 4 | 4 | 5 | 5 | 9 | N/A |
| 2  | < =2                                                                                       |                                                                                                                                                                                                                                                                                     |                                                                                                                                                                                                                                                     |   |      |   |   |   |   |   |   |   |     |
| 3  | 3                                                                                          |                                                                                                                                                                                                                                                                                     |                                                                                                                                                                                                                                                     |   |      |   |   |   |   |   |   |   |     |
| 4  | 4                                                                                          |                                                                                                                                                                                                                                                                                     |                                                                                                                                                                                                                                                     |   |      |   |   |   |   |   |   |   |     |
| 5  | 5                                                                                          |                                                                                                                                                                                                                                                                                     |                                                                                                                                                                                                                                                     |   |      |   |   |   |   |   |   |   |     |
| 9  | N/A                                                                                        |                                                                                                                                                                                                                                                                                     |                                                                                                                                                                                                                                                     |   |      |   |   |   |   |   |   |   |     |
| 30 | <p>[ <b>preeeg_bc</b> ]</p> <p>Show the field ONLY if:<br/>[preeeg_edata] = '1'</p>        | <p>Specify how criteria are met, as outlined below (BASED score description guide):</p>                                                                                                                                                                                             | <p>text</p>                                                                                                                                                                                                                                         |   |      |   |   |   |   |   |   |   |     |
| 31 | <p>[ <b>basedscoreimage1</b> ]</p> <p>Show the field ONLY if:<br/>[preeeg_edata] = '1'</p> | <p>BASED score description guide:</p>                                                                                                                                                                                                                                               | <p>descriptive</p>                                                                                                                                                                                                                                  |   |      |   |   |   |   |   |   |   |     |

|    |                                                                          |                                                                                                                                                                                                                                                                                                                                                                                                                                                                                                                                                                                                                                                                                                                                                                                                                                                                                                                                                                                                                                                                                                                                 |                                                                                                                                                                                      |   |     |   |    |   |         |
|----|--------------------------------------------------------------------------|---------------------------------------------------------------------------------------------------------------------------------------------------------------------------------------------------------------------------------------------------------------------------------------------------------------------------------------------------------------------------------------------------------------------------------------------------------------------------------------------------------------------------------------------------------------------------------------------------------------------------------------------------------------------------------------------------------------------------------------------------------------------------------------------------------------------------------------------------------------------------------------------------------------------------------------------------------------------------------------------------------------------------------------------------------------------------------------------------------------------------------|--------------------------------------------------------------------------------------------------------------------------------------------------------------------------------------|---|-----|---|----|---|---------|
| 32 | [ <b>treatmentdescrip1</b> ]                                             | <p>Section Header: <i>Initial Treatment Response Definitions</i></p> <p>PLEASE USE THESE DEFINITIONS FOR QUESTIONS BELOW</p> <p>Initial treatment response options:</p> <p>Full/Complete 14 day response: Cessation of spasms by 14 days and resolution of hypsarrhythmia (if present on initial EEG) (from treatment initiation for ACTH or prednisolone, from max dose for vigabatrin)</p> <p>Late response after 14 days: Cessation of spasms AFTER 14 days and resolution of hypsarrhythmia (if present on initial EEG) (from treatment initiation for ACTH or prednisolone, from max dose for vigabatrin)</p> <p>Partial response (CDKL5 group only): Reduction in median daily spasm frequency but not spasm freedom, or apparent cessation of spasms but persistence of hypsarrhythmia (classify as &gt;50% reduction in spasms or &lt; 50% reduction in spasms)</p> <p>None: No change in median daily spasm frequency</p> <p>Worsening: Increase in median daily spasm frequency</p> <p>Note: For the ketogenic diet response is assessed at 1 month after initiation, if started within 3 months of spasms onset.</p> | descriptive                                                                                                                                                                          |   |     |   |    |   |         |
| 33 | [ <b>acth</b> ]                                                          | <p>Section Header: <i>ACTH</i></p> <p>Was ACTH used at any point?</p>                                                                                                                                                                                                                                                                                                                                                                                                                                                                                                                                                                                                                                                                                                                                                                                                                                                                                                                                                                                                                                                           | <p>radio</p> <table border="1" data-bbox="1354 1101 1528 1263"> <tr> <td>1</td> <td>Yes</td> </tr> <tr> <td>2</td> <td>No</td> </tr> <tr> <td>9</td> <td>Unknown</td> </tr> </table> | 1 | Yes | 2 | No | 9 | Unknown |
| 1  | Yes                                                                      |                                                                                                                                                                                                                                                                                                                                                                                                                                                                                                                                                                                                                                                                                                                                                                                                                                                                                                                                                                                                                                                                                                                                 |                                                                                                                                                                                      |   |     |   |    |   |         |
| 2  | No                                                                       |                                                                                                                                                                                                                                                                                                                                                                                                                                                                                                                                                                                                                                                                                                                                                                                                                                                                                                                                                                                                                                                                                                                                 |                                                                                                                                                                                      |   |     |   |    |   |         |
| 9  | Unknown                                                                  |                                                                                                                                                                                                                                                                                                                                                                                                                                                                                                                                                                                                                                                                                                                                                                                                                                                                                                                                                                                                                                                                                                                                 |                                                                                                                                                                                      |   |     |   |    |   |         |
| 34 | <p>[ <b>acth_1</b> ]</p> <p>Show the field ONLY if:<br/>[acth] = '1'</p> | <p>Was ACTH given as the first treatment for spasms?</p>                                                                                                                                                                                                                                                                                                                                                                                                                                                                                                                                                                                                                                                                                                                                                                                                                                                                                                                                                                                                                                                                        | <p>radio</p> <table border="1" data-bbox="1354 1317 1528 1474"> <tr> <td>1</td> <td>Yes</td> </tr> <tr> <td>2</td> <td>No</td> </tr> <tr> <td>9</td> <td>Unknown</td> </tr> </table> | 1 | Yes | 2 | No | 9 | Unknown |
| 1  | Yes                                                                      |                                                                                                                                                                                                                                                                                                                                                                                                                                                                                                                                                                                                                                                                                                                                                                                                                                                                                                                                                                                                                                                                                                                                 |                                                                                                                                                                                      |   |     |   |    |   |         |
| 2  | No                                                                       |                                                                                                                                                                                                                                                                                                                                                                                                                                                                                                                                                                                                                                                                                                                                                                                                                                                                                                                                                                                                                                                                                                                                 |                                                                                                                                                                                      |   |     |   |    |   |         |
| 9  | Unknown                                                                  |                                                                                                                                                                                                                                                                                                                                                                                                                                                                                                                                                                                                                                                                                                                                                                                                                                                                                                                                                                                                                                                                                                                                 |                                                                                                                                                                                      |   |     |   |    |   |         |

|    |                                                                       |                                                           |                                                                                                                                                                                                                                                                                                                                                                                         |   |                          |   |                             |   |                             |   |      |   |           |   |         |   |                                            |
|----|-----------------------------------------------------------------------|-----------------------------------------------------------|-----------------------------------------------------------------------------------------------------------------------------------------------------------------------------------------------------------------------------------------------------------------------------------------------------------------------------------------------------------------------------------------|---|--------------------------|---|-----------------------------|---|-----------------------------|---|------|---|-----------|---|---------|---|--------------------------------------------|
| 35 | [ <b>acth_age</b> ]<br>Show the field ONLY if:<br>[acth] = '1'        | Age at treatment (months)?<br><i>integer</i>              | text (integer)                                                                                                                                                                                                                                                                                                                                                                          |   |                          |   |                             |   |                             |   |      |   |           |   |         |   |                                            |
| 36 | [ <b>acth_max</b> ]<br>Show the field ONLY if:<br>[acth] = '1'        | Max dose of ACTH (in units/m2):<br><i>--- (units/m2)</i>  | text (number_1dp)                                                                                                                                                                                                                                                                                                                                                                       |   |                          |   |                             |   |                             |   |      |   |           |   |         |   |                                            |
| 37 | [ <b>acth_length</b> ]<br>Show the field ONLY if:<br>[acth] = '1'     | Length of treatment at max dose (days):<br><i>integer</i> | text (integer)                                                                                                                                                                                                                                                                                                                                                                          |   |                          |   |                             |   |                             |   |      |   |           |   |         |   |                                            |
| 38 | [ <b>acth_clin</b> ]<br>Show the field ONLY if:<br>[acth] = '1'       | Day 14 response to ACTH, clinical observation only?       | radio<br><table border="1"> <tr><td>1</td><td>Full 14-day response</td></tr> <tr><td>2</td><td>Late response after 14 days</td></tr> <tr><td>3</td><td>Partial [CDKL5 cohort only]</td></tr> <tr><td>4</td><td>None</td></tr> <tr><td>5</td><td>Worsening</td></tr> <tr><td>6</td><td>Unknown</td></tr> <tr><td>9</td><td>N/A, did not complete 14 days of treatment</td></tr> </table> | 1 | Full 14-day response     | 2 | Late response after 14 days | 3 | Partial [CDKL5 cohort only] | 4 | None | 5 | Worsening | 6 | Unknown | 9 | N/A, did not complete 14 days of treatment |
| 1  | Full 14-day response                                                  |                                                           |                                                                                                                                                                                                                                                                                                                                                                                         |   |                          |   |                             |   |                             |   |      |   |           |   |         |   |                                            |
| 2  | Late response after 14 days                                           |                                                           |                                                                                                                                                                                                                                                                                                                                                                                         |   |                          |   |                             |   |                             |   |      |   |           |   |         |   |                                            |
| 3  | Partial [CDKL5 cohort only]                                           |                                                           |                                                                                                                                                                                                                                                                                                                                                                                         |   |                          |   |                             |   |                             |   |      |   |           |   |         |   |                                            |
| 4  | None                                                                  |                                                           |                                                                                                                                                                                                                                                                                                                                                                                         |   |                          |   |                             |   |                             |   |      |   |           |   |         |   |                                            |
| 5  | Worsening                                                             |                                                           |                                                                                                                                                                                                                                                                                                                                                                                         |   |                          |   |                             |   |                             |   |      |   |           |   |         |   |                                            |
| 6  | Unknown                                                               |                                                           |                                                                                                                                                                                                                                                                                                                                                                                         |   |                          |   |                             |   |                             |   |      |   |           |   |         |   |                                            |
| 9  | N/A, did not complete 14 days of treatment                            |                                                           |                                                                                                                                                                                                                                                                                                                                                                                         |   |                          |   |                             |   |                             |   |      |   |           |   |         |   |                                            |
| 39 | [ <b>acth_part14</b> ]<br>Show the field ONLY if:<br>[acth_clin] ='3' | If partial response, please clarify:                      | radio<br><table border="1"> <tr><td>1</td><td>&gt;50% reduction in spasms</td></tr> <tr><td>2</td><td>&lt; 50% reduction in spasms</td></tr> <tr><td>9</td><td>Unknown</td></tr> </table>                                                                                                                                                                                               | 1 | >50% reduction in spasms | 2 | < 50% reduction in spasms   | 9 | Unknown                     |   |      |   |           |   |         |   |                                            |
| 1  | >50% reduction in spasms                                              |                                                           |                                                                                                                                                                                                                                                                                                                                                                                         |   |                          |   |                             |   |                             |   |      |   |           |   |         |   |                                            |
| 2  | < 50% reduction in spasms                                             |                                                           |                                                                                                                                                                                                                                                                                                                                                                                         |   |                          |   |                             |   |                             |   |      |   |           |   |         |   |                                            |
| 9  | Unknown                                                               |                                                           |                                                                                                                                                                                                                                                                                                                                                                                         |   |                          |   |                             |   |                             |   |      |   |           |   |         |   |                                            |
| 40 | [ <b>acth_part15</b> ]<br>Show the field ONLY if:<br>[acth_clin] ='3' | If partial response, please add any relevant notes:       | notes                                                                                                                                                                                                                                                                                                                                                                                   |   |                          |   |                             |   |                             |   |      |   |           |   |         |   |                                            |



|    |                                                                             |                                                                                |                                                                                                                                                                                                                                                                                                                                                  |   |                                            |   |                                          |   |                             |   |      |   |           |   |         |   |     |
|----|-----------------------------------------------------------------------------|--------------------------------------------------------------------------------|--------------------------------------------------------------------------------------------------------------------------------------------------------------------------------------------------------------------------------------------------------------------------------------------------------------------------------------------------|---|--------------------------------------------|---|------------------------------------------|---|-----------------------------|---|------|---|-----------|---|---------|---|-----|
| 41 | [ <b>acth_eeg</b> ]<br>Show the field ONLY if:<br>[acth] = '1'              | Day 14+ response to ACTH, with follow- up EEG data (2-4 weeks after starting)? | radio<br><table border="1"> <tr><td>1</td><td>Full 14-day response</td></tr> <tr><td>2</td><td>Late response after 14 days</td></tr> <tr><td>3</td><td>Partial [CDKL5 cohort only]</td></tr> <tr><td>4</td><td>None</td></tr> <tr><td>5</td><td>Worsening</td></tr> <tr><td>6</td><td>Unknown</td></tr> <tr><td>9</td><td>N/A</td></tr> </table> | 1 | Full 14-day response                       | 2 | Late response after 14 days              | 3 | Partial [CDKL5 cohort only] | 4 | None | 5 | Worsening | 6 | Unknown | 9 | N/A |
| 1  | Full 14-day response                                                        |                                                                                |                                                                                                                                                                                                                                                                                                                                                  |   |                                            |   |                                          |   |                             |   |      |   |           |   |         |   |     |
| 2  | Late response after 14 days                                                 |                                                                                |                                                                                                                                                                                                                                                                                                                                                  |   |                                            |   |                                          |   |                             |   |      |   |           |   |         |   |     |
| 3  | Partial [CDKL5 cohort only]                                                 |                                                                                |                                                                                                                                                                                                                                                                                                                                                  |   |                                            |   |                                          |   |                             |   |      |   |           |   |         |   |     |
| 4  | None                                                                        |                                                                                |                                                                                                                                                                                                                                                                                                                                                  |   |                                            |   |                                          |   |                             |   |      |   |           |   |         |   |     |
| 5  | Worsening                                                                   |                                                                                |                                                                                                                                                                                                                                                                                                                                                  |   |                                            |   |                                          |   |                             |   |      |   |           |   |         |   |     |
| 6  | Unknown                                                                     |                                                                                |                                                                                                                                                                                                                                                                                                                                                  |   |                                            |   |                                          |   |                             |   |      |   |           |   |         |   |     |
| 9  | N/A                                                                         |                                                                                |                                                                                                                                                                                                                                                                                                                                                  |   |                                            |   |                                          |   |                             |   |      |   |           |   |         |   |     |
| 42 | [ <b>acth_part14plus</b> ]<br>Show the field ONLY if:<br>[acth_eeg] = '3'   | If partial response, please clarify:                                           | radio<br><table border="1"> <tr><td>1</td><td>&gt;50% reduction in spasms</td></tr> <tr><td>2</td><td>&lt; 50% reduction in spasms</td></tr> <tr><td>9</td><td>Unknown</td></tr> </table>                                                                                                                                                        | 1 | >50% reduction in spasms                   | 2 | < 50% reduction in spasms                | 9 | Unknown                     |   |      |   |           |   |         |   |     |
| 1  | >50% reduction in spasms                                                    |                                                                                |                                                                                                                                                                                                                                                                                                                                                  |   |                                            |   |                                          |   |                             |   |      |   |           |   |         |   |     |
| 2  | < 50% reduction in spasms                                                   |                                                                                |                                                                                                                                                                                                                                                                                                                                                  |   |                                            |   |                                          |   |                             |   |      |   |           |   |         |   |     |
| 9  | Unknown                                                                     |                                                                                |                                                                                                                                                                                                                                                                                                                                                  |   |                                            |   |                                          |   |                             |   |      |   |           |   |         |   |     |
| 43 | [ <b>acth_part14plus_2</b> ]<br>Show the field ONLY if:<br>[acth_eeg] = '3' | If partial response, please add any relevant notes:                            | notes                                                                                                                                                                                                                                                                                                                                            |   |                                            |   |                                          |   |                             |   |      |   |           |   |         |   |     |
| 44 | [ <b>acth_3</b> ]<br>Show the field ONLY if:<br>[acth] = '1'                | Response at 3 months to ACTH, clinical observation?<br><i>EEG not required</i> | radio<br><table border="1"> <tr><td>1</td><td>Full 14-day response sustained at 3 months</td></tr> <tr><td>2</td><td>Full late response sustained at 3 months</td></tr> <tr><td>3</td><td>Partial [CDKL5 cohort only]</td></tr> <tr><td>4</td><td>None</td></tr> <tr><td>6</td><td>Unknown</td></tr> <tr><td>9</td><td>N/A</td></tr> </table>    | 1 | Full 14-day response sustained at 3 months | 2 | Full late response sustained at 3 months | 3 | Partial [CDKL5 cohort only] | 4 | None | 6 | Unknown   | 9 | N/A     |   |     |
| 1  | Full 14-day response sustained at 3 months                                  |                                                                                |                                                                                                                                                                                                                                                                                                                                                  |   |                                            |   |                                          |   |                             |   |      |   |           |   |         |   |     |
| 2  | Full late response sustained at 3 months                                    |                                                                                |                                                                                                                                                                                                                                                                                                                                                  |   |                                            |   |                                          |   |                             |   |      |   |           |   |         |   |     |
| 3  | Partial [CDKL5 cohort only]                                                 |                                                                                |                                                                                                                                                                                                                                                                                                                                                  |   |                                            |   |                                          |   |                             |   |      |   |           |   |         |   |     |
| 4  | None                                                                        |                                                                                |                                                                                                                                                                                                                                                                                                                                                  |   |                                            |   |                                          |   |                             |   |      |   |           |   |         |   |     |
| 6  | Unknown                                                                     |                                                                                |                                                                                                                                                                                                                                                                                                                                                  |   |                                            |   |                                          |   |                             |   |      |   |           |   |         |   |     |
| 9  | N/A                                                                         |                                                                                |                                                                                                                                                                                                                                                                                                                                                  |   |                                            |   |                                          |   |                             |   |      |   |           |   |         |   |     |
| 45 | [ <b>acth_part3</b> ]<br>Show the field ONLY if:<br>[acth_3] = '3'          | If partial response, please clarify:                                           | radio<br><table border="1"> <tr><td>1</td><td>&gt;50% reduction in spasms</td></tr> <tr><td>2</td><td>&lt; 50% reduction in spasms</td></tr> <tr><td>9</td><td>Unknown</td></tr> </table>                                                                                                                                                        | 1 | >50% reduction in spasms                   | 2 | < 50% reduction in spasms                | 9 | Unknown                     |   |      |   |           |   |         |   |     |
| 1  | >50% reduction in spasms                                                    |                                                                                |                                                                                                                                                                                                                                                                                                                                                  |   |                                            |   |                                          |   |                             |   |      |   |           |   |         |   |     |
| 2  | < 50% reduction in spasms                                                   |                                                                                |                                                                                                                                                                                                                                                                                                                                                  |   |                                            |   |                                          |   |                             |   |      |   |           |   |         |   |     |
| 9  | Unknown                                                                     |                                                                                |                                                                                                                                                                                                                                                                                                                                                  |   |                                            |   |                                          |   |                             |   |      |   |           |   |         |   |     |

|    |                                                                    |                                                                            |                                                                                                                                                                                                                                                                                                                                               |   |                                            |   |                                          |   |                             |   |      |   |         |   |     |
|----|--------------------------------------------------------------------|----------------------------------------------------------------------------|-----------------------------------------------------------------------------------------------------------------------------------------------------------------------------------------------------------------------------------------------------------------------------------------------------------------------------------------------|---|--------------------------------------------|---|------------------------------------------|---|-----------------------------|---|------|---|---------|---|-----|
| 46 | [ <b>acth_part4</b> ]<br>Show the field ONLY if:<br>[acth_3] = '3' | If partial response, please add any relevant notes:                        | notes                                                                                                                                                                                                                                                                                                                                         |   |                                            |   |                                          |   |                             |   |      |   |         |   |     |
| 47 | [ <b>acth_6</b> ]<br>Show the field ONLY if:<br>[acth] = '1'       | Spasm control at 6 months (clinical observation)?                          | radio<br><table border="1"> <tr><td>1</td><td>Full 14-day response sustained at 6 months</td></tr> <tr><td>2</td><td>Full late response sustained at 6 months</td></tr> <tr><td>3</td><td>Partial [CDKL5 cohort only]</td></tr> <tr><td>4</td><td>None</td></tr> <tr><td>6</td><td>Unknown</td></tr> <tr><td>9</td><td>N/A</td></tr> </table> | 1 | Full 14-day response sustained at 6 months | 2 | Full late response sustained at 6 months | 3 | Partial [CDKL5 cohort only] | 4 | None | 6 | Unknown | 9 | N/A |
| 1  | Full 14-day response sustained at 6 months                         |                                                                            |                                                                                                                                                                                                                                                                                                                                               |   |                                            |   |                                          |   |                             |   |      |   |         |   |     |
| 2  | Full late response sustained at 6 months                           |                                                                            |                                                                                                                                                                                                                                                                                                                                               |   |                                            |   |                                          |   |                             |   |      |   |         |   |     |
| 3  | Partial [CDKL5 cohort only]                                        |                                                                            |                                                                                                                                                                                                                                                                                                                                               |   |                                            |   |                                          |   |                             |   |      |   |         |   |     |
| 4  | None                                                               |                                                                            |                                                                                                                                                                                                                                                                                                                                               |   |                                            |   |                                          |   |                             |   |      |   |         |   |     |
| 6  | Unknown                                                            |                                                                            |                                                                                                                                                                                                                                                                                                                                               |   |                                            |   |                                          |   |                             |   |      |   |         |   |     |
| 9  | N/A                                                                |                                                                            |                                                                                                                                                                                                                                                                                                                                               |   |                                            |   |                                          |   |                             |   |      |   |         |   |     |
| 48 | [ <b>acth_part6</b> ]<br>Show the field ONLY if:<br>[acth_6] = '3' | If partial response, please clarify:                                       | radio<br><table border="1"> <tr><td>1</td><td>&gt;50% reduction in spasms</td></tr> <tr><td>2</td><td>&lt; 50% reduction in spasms</td></tr> <tr><td>9</td><td>Unknown</td></tr> </table>                                                                                                                                                     | 1 | >50% reduction in spasms                   | 2 | < 50% reduction in spasms                | 9 | Unknown                     |   |      |   |         |   |     |
| 1  | >50% reduction in spasms                                           |                                                                            |                                                                                                                                                                                                                                                                                                                                               |   |                                            |   |                                          |   |                             |   |      |   |         |   |     |
| 2  | < 50% reduction in spasms                                          |                                                                            |                                                                                                                                                                                                                                                                                                                                               |   |                                            |   |                                          |   |                             |   |      |   |         |   |     |
| 9  | Unknown                                                            |                                                                            |                                                                                                                                                                                                                                                                                                                                               |   |                                            |   |                                          |   |                             |   |      |   |         |   |     |
| 49 | [ <b>acth_part7</b> ]<br>Show the field ONLY if:<br>[acth_6] = '3' | If partial response, please add any relevant notes:                        | notes                                                                                                                                                                                                                                                                                                                                         |   |                                            |   |                                          |   |                             |   |      |   |         |   |     |
| 50 | [ <b>pred</b> ]                                                    | Section Header: <i>Prednisolone</i><br>Was prednisolone used at any point? | radio<br><table border="1"> <tr><td>1</td><td>Yes</td></tr> <tr><td>2</td><td>No</td></tr> <tr><td>9</td><td>Unknown</td></tr> </table>                                                                                                                                                                                                       | 1 | Yes                                        | 2 | No                                       | 9 | Unknown                     |   |      |   |         |   |     |
| 1  | Yes                                                                |                                                                            |                                                                                                                                                                                                                                                                                                                                               |   |                                            |   |                                          |   |                             |   |      |   |         |   |     |
| 2  | No                                                                 |                                                                            |                                                                                                                                                                                                                                                                                                                                               |   |                                            |   |                                          |   |                             |   |      |   |         |   |     |
| 9  | Unknown                                                            |                                                                            |                                                                                                                                                                                                                                                                                                                                               |   |                                            |   |                                          |   |                             |   |      |   |         |   |     |
| 51 | [ <b>pred_1</b> ]<br>Show the field ONLY if:<br>[pred] = '1'       | Was prednisolone given as the first treatment for spasms?                  | radio<br><table border="1"> <tr><td>1</td><td>Yes</td></tr> <tr><td>2</td><td>No</td></tr> <tr><td>9</td><td>Unknown</td></tr> </table>                                                                                                                                                                                                       | 1 | Yes                                        | 2 | No                                       | 9 | Unknown                     |   |      |   |         |   |     |
| 1  | Yes                                                                |                                                                            |                                                                                                                                                                                                                                                                                                                                               |   |                                            |   |                                          |   |                             |   |      |   |         |   |     |
| 2  | No                                                                 |                                                                            |                                                                                                                                                                                                                                                                                                                                               |   |                                            |   |                                          |   |                             |   |      |   |         |   |     |
| 9  | Unknown                                                            |                                                                            |                                                                                                                                                                                                                                                                                                                                               |   |                                            |   |                                          |   |                             |   |      |   |         |   |     |
| 52 | [ <b>pred_age</b> ]<br>Show the field ONLY if:<br>[pred] = '1'     | Age at treatment (months)?<br><i>integer</i>                               | text (integer)                                                                                                                                                                                                                                                                                                                                |   |                                            |   |                                          |   |                             |   |      |   |         |   |     |

|    |                                                                                 |                                                             |                                                                                                                                                                                                                                                                                                                                                                                         |   |                          |   |                             |   |                             |   |      |   |           |   |         |   |                                            |
|----|---------------------------------------------------------------------------------|-------------------------------------------------------------|-----------------------------------------------------------------------------------------------------------------------------------------------------------------------------------------------------------------------------------------------------------------------------------------------------------------------------------------------------------------------------------------|---|--------------------------|---|-----------------------------|---|-----------------------------|---|------|---|-----------|---|---------|---|--------------------------------------------|
| 53 | [ <a href="#">pred_max</a> ]<br>Show the field ONLY if:<br>[pred] = '1'         | Max dose of prednisolone (in mg/kg/day):<br>--- (mg/kg/day) | text (number_1dp)                                                                                                                                                                                                                                                                                                                                                                       |   |                          |   |                             |   |                             |   |      |   |           |   |         |   |                                            |
| 54 | [ <a href="#">pred_length</a> ]<br>Show the field ONLY if:<br>[pred] = '1'      | Length of treatment at max dose (days):<br><i>integer</i>   | text (integer)                                                                                                                                                                                                                                                                                                                                                                          |   |                          |   |                             |   |                             |   |      |   |           |   |         |   |                                            |
| 55 | [ <a href="#">pred_clin</a> ]<br>Show the field ONLY if:<br>[pred] = '1'        | Day 14 response to prednisolone, clinical observation only? | radio<br><table border="1"> <tr><td>1</td><td>Full 14-day response</td></tr> <tr><td>2</td><td>Late response after 14 days</td></tr> <tr><td>3</td><td>Partial [CDKL5 cohort only]</td></tr> <tr><td>4</td><td>None</td></tr> <tr><td>5</td><td>Worsening</td></tr> <tr><td>6</td><td>Unknown</td></tr> <tr><td>9</td><td>N/A, did not complete 14 days of treatment</td></tr> </table> | 1 | Full 14-day response     | 2 | Late response after 14 days | 3 | Partial [CDKL5 cohort only] | 4 | None | 5 | Worsening | 6 | Unknown | 9 | N/A, did not complete 14 days of treatment |
| 1  | Full 14-day response                                                            |                                                             |                                                                                                                                                                                                                                                                                                                                                                                         |   |                          |   |                             |   |                             |   |      |   |           |   |         |   |                                            |
| 2  | Late response after 14 days                                                     |                                                             |                                                                                                                                                                                                                                                                                                                                                                                         |   |                          |   |                             |   |                             |   |      |   |           |   |         |   |                                            |
| 3  | Partial [CDKL5 cohort only]                                                     |                                                             |                                                                                                                                                                                                                                                                                                                                                                                         |   |                          |   |                             |   |                             |   |      |   |           |   |         |   |                                            |
| 4  | None                                                                            |                                                             |                                                                                                                                                                                                                                                                                                                                                                                         |   |                          |   |                             |   |                             |   |      |   |           |   |         |   |                                            |
| 5  | Worsening                                                                       |                                                             |                                                                                                                                                                                                                                                                                                                                                                                         |   |                          |   |                             |   |                             |   |      |   |           |   |         |   |                                            |
| 6  | Unknown                                                                         |                                                             |                                                                                                                                                                                                                                                                                                                                                                                         |   |                          |   |                             |   |                             |   |      |   |           |   |         |   |                                            |
| 9  | N/A, did not complete 14 days of treatment                                      |                                                             |                                                                                                                                                                                                                                                                                                                                                                                         |   |                          |   |                             |   |                             |   |      |   |           |   |         |   |                                            |
| 56 | [ <a href="#">pred_part14</a> ]<br>Show the field ONLY if:<br>[pred_clin] = '3' | If partial response, please clarify:                        | radio<br><table border="1"> <tr><td>1</td><td>&gt;50% reduction in spasms</td></tr> <tr><td>2</td><td>&lt; 50% reduction in spasms</td></tr> <tr><td>9</td><td>Unknown</td></tr> </table>                                                                                                                                                                                               | 1 | >50% reduction in spasms | 2 | < 50% reduction in spasms   | 9 | Unknown                     |   |      |   |           |   |         |   |                                            |
| 1  | >50% reduction in spasms                                                        |                                                             |                                                                                                                                                                                                                                                                                                                                                                                         |   |                          |   |                             |   |                             |   |      |   |           |   |         |   |                                            |
| 2  | < 50% reduction in spasms                                                       |                                                             |                                                                                                                                                                                                                                                                                                                                                                                         |   |                          |   |                             |   |                             |   |      |   |           |   |         |   |                                            |
| 9  | Unknown                                                                         |                                                             |                                                                                                                                                                                                                                                                                                                                                                                         |   |                          |   |                             |   |                             |   |      |   |           |   |         |   |                                            |
| 57 | [ <a href="#">pred_part15</a> ]<br>Show the field ONLY if:<br>[pred_clin] = '3' | If partial response, please add any relevant notes:         | notes                                                                                                                                                                                                                                                                                                                                                                                   |   |                          |   |                             |   |                             |   |      |   |           |   |         |   |                                            |

|    |                                                                    |                                                                                        |                                                                                                                                                                                                                                                                                                                                                  |   |                                            |   |                                          |   |                             |   |      |   |           |   |         |   |     |
|----|--------------------------------------------------------------------|----------------------------------------------------------------------------------------|--------------------------------------------------------------------------------------------------------------------------------------------------------------------------------------------------------------------------------------------------------------------------------------------------------------------------------------------------|---|--------------------------------------------|---|------------------------------------------|---|-----------------------------|---|------|---|-----------|---|---------|---|-----|
| 58 | [pred_eeg]<br>Show the field ONLY if:<br>[pred] = '1'              | Day 14+ response to prednisolone, with follow-up EEG data (2-4 weeks after starting)?  | radio<br><table border="1"> <tr><td>1</td><td>Full 14-day response</td></tr> <tr><td>2</td><td>Late response after 14 days</td></tr> <tr><td>3</td><td>Partial [CDKL5 cohort only]</td></tr> <tr><td>4</td><td>None</td></tr> <tr><td>5</td><td>Worsening</td></tr> <tr><td>6</td><td>Unknown</td></tr> <tr><td>9</td><td>N/A</td></tr> </table> | 1 | Full 14-day response                       | 2 | Late response after 14 days              | 3 | Partial [CDKL5 cohort only] | 4 | None | 5 | Worsening | 6 | Unknown | 9 | N/A |
| 1  | Full 14-day response                                               |                                                                                        |                                                                                                                                                                                                                                                                                                                                                  |   |                                            |   |                                          |   |                             |   |      |   |           |   |         |   |     |
| 2  | Late response after 14 days                                        |                                                                                        |                                                                                                                                                                                                                                                                                                                                                  |   |                                            |   |                                          |   |                             |   |      |   |           |   |         |   |     |
| 3  | Partial [CDKL5 cohort only]                                        |                                                                                        |                                                                                                                                                                                                                                                                                                                                                  |   |                                            |   |                                          |   |                             |   |      |   |           |   |         |   |     |
| 4  | None                                                               |                                                                                        |                                                                                                                                                                                                                                                                                                                                                  |   |                                            |   |                                          |   |                             |   |      |   |           |   |         |   |     |
| 5  | Worsening                                                          |                                                                                        |                                                                                                                                                                                                                                                                                                                                                  |   |                                            |   |                                          |   |                             |   |      |   |           |   |         |   |     |
| 6  | Unknown                                                            |                                                                                        |                                                                                                                                                                                                                                                                                                                                                  |   |                                            |   |                                          |   |                             |   |      |   |           |   |         |   |     |
| 9  | N/A                                                                |                                                                                        |                                                                                                                                                                                                                                                                                                                                                  |   |                                            |   |                                          |   |                             |   |      |   |           |   |         |   |     |
| 59 | [pred_part14plus]<br>Show the field ONLY if:<br>[pred_eeg] = '3'   | If partial response, please clarify:                                                   | radio<br><table border="1"> <tr><td>1</td><td>&gt;50% reduction in spasms</td></tr> <tr><td>2</td><td>&lt; 50% reduction in spasms</td></tr> <tr><td>3</td><td>Unknown</td></tr> </table>                                                                                                                                                        | 1 | >50% reduction in spasms                   | 2 | < 50% reduction in spasms                | 3 | Unknown                     |   |      |   |           |   |         |   |     |
| 1  | >50% reduction in spasms                                           |                                                                                        |                                                                                                                                                                                                                                                                                                                                                  |   |                                            |   |                                          |   |                             |   |      |   |           |   |         |   |     |
| 2  | < 50% reduction in spasms                                          |                                                                                        |                                                                                                                                                                                                                                                                                                                                                  |   |                                            |   |                                          |   |                             |   |      |   |           |   |         |   |     |
| 3  | Unknown                                                            |                                                                                        |                                                                                                                                                                                                                                                                                                                                                  |   |                                            |   |                                          |   |                             |   |      |   |           |   |         |   |     |
| 60 | [pred_part14plus_2]<br>Show the field ONLY if:<br>[pred_eeg] = '3' | If partial response, please add any relevant notes:                                    | notes                                                                                                                                                                                                                                                                                                                                            |   |                                            |   |                                          |   |                             |   |      |   |           |   |         |   |     |
| 61 | [pred_3]<br>Show the field ONLY if:<br>[pred] = '1'                | Response at 3 months to prednisolone, clinical observation?<br><i>EEG not required</i> | radio<br><table border="1"> <tr><td>1</td><td>Full 14-day response sustained at 3 months</td></tr> <tr><td>2</td><td>Full late response sustained at 3 months</td></tr> <tr><td>3</td><td>Partial [CDKL5 cohort only]</td></tr> <tr><td>4</td><td>None</td></tr> <tr><td>6</td><td>Unknown</td></tr> <tr><td>9</td><td>N/A</td></tr> </table>    | 1 | Full 14-day response sustained at 3 months | 2 | Full late response sustained at 3 months | 3 | Partial [CDKL5 cohort only] | 4 | None | 6 | Unknown   | 9 | N/A     |   |     |
| 1  | Full 14-day response sustained at 3 months                         |                                                                                        |                                                                                                                                                                                                                                                                                                                                                  |   |                                            |   |                                          |   |                             |   |      |   |           |   |         |   |     |
| 2  | Full late response sustained at 3 months                           |                                                                                        |                                                                                                                                                                                                                                                                                                                                                  |   |                                            |   |                                          |   |                             |   |      |   |           |   |         |   |     |
| 3  | Partial [CDKL5 cohort only]                                        |                                                                                        |                                                                                                                                                                                                                                                                                                                                                  |   |                                            |   |                                          |   |                             |   |      |   |           |   |         |   |     |
| 4  | None                                                               |                                                                                        |                                                                                                                                                                                                                                                                                                                                                  |   |                                            |   |                                          |   |                             |   |      |   |           |   |         |   |     |
| 6  | Unknown                                                            |                                                                                        |                                                                                                                                                                                                                                                                                                                                                  |   |                                            |   |                                          |   |                             |   |      |   |           |   |         |   |     |
| 9  | N/A                                                                |                                                                                        |                                                                                                                                                                                                                                                                                                                                                  |   |                                            |   |                                          |   |                             |   |      |   |           |   |         |   |     |
| 62 | [pred_part3]<br>Show the field ONLY if:<br>[pred_3] = '3'          | If partial response, please clarify:                                                   | radio<br><table border="1"> <tr><td>1</td><td>&gt;50% reduction in spasms</td></tr> <tr><td>2</td><td>&lt; 50% reduction in spasms</td></tr> <tr><td>9</td><td>Unknown</td></tr> </table>                                                                                                                                                        | 1 | >50% reduction in spasms                   | 2 | < 50% reduction in spasms                | 9 | Unknown                     |   |      |   |           |   |         |   |     |
| 1  | >50% reduction in spasms                                           |                                                                                        |                                                                                                                                                                                                                                                                                                                                                  |   |                                            |   |                                          |   |                             |   |      |   |           |   |         |   |     |
| 2  | < 50% reduction in spasms                                          |                                                                                        |                                                                                                                                                                                                                                                                                                                                                  |   |                                            |   |                                          |   |                             |   |      |   |           |   |         |   |     |
| 9  | Unknown                                                            |                                                                                        |                                                                                                                                                                                                                                                                                                                                                  |   |                                            |   |                                          |   |                             |   |      |   |           |   |         |   |     |

|    |                                                                             |                                                                        |                                                                                                                                                                                                                                                                                                                                               |   |                                            |   |                                          |   |                             |   |      |   |         |   |     |
|----|-----------------------------------------------------------------------------|------------------------------------------------------------------------|-----------------------------------------------------------------------------------------------------------------------------------------------------------------------------------------------------------------------------------------------------------------------------------------------------------------------------------------------|---|--------------------------------------------|---|------------------------------------------|---|-----------------------------|---|------|---|---------|---|-----|
| 63 | [ <a href="#">pred_part4</a> ]<br>Show the field ONLY if:<br>[pred_3] = '3' | If partial response, please add any relevant notes:                    | notes                                                                                                                                                                                                                                                                                                                                         |   |                                            |   |                                          |   |                             |   |      |   |         |   |     |
| 64 | [ <a href="#">pred_6</a> ]<br>Show the field ONLY if:<br>[pred] = '1'       | Spasm control at 6 months (clinical observation)?                      | radio<br><table border="1"> <tr><td>1</td><td>Full 14-day response sustained at 6 months</td></tr> <tr><td>2</td><td>Full late response sustained at 6 months</td></tr> <tr><td>3</td><td>Partial [CDKL5 cohort only]</td></tr> <tr><td>4</td><td>None</td></tr> <tr><td>6</td><td>Unknown</td></tr> <tr><td>9</td><td>N/A</td></tr> </table> | 1 | Full 14-day response sustained at 6 months | 2 | Full late response sustained at 6 months | 3 | Partial [CDKL5 cohort only] | 4 | None | 6 | Unknown | 9 | N/A |
| 1  | Full 14-day response sustained at 6 months                                  |                                                                        |                                                                                                                                                                                                                                                                                                                                               |   |                                            |   |                                          |   |                             |   |      |   |         |   |     |
| 2  | Full late response sustained at 6 months                                    |                                                                        |                                                                                                                                                                                                                                                                                                                                               |   |                                            |   |                                          |   |                             |   |      |   |         |   |     |
| 3  | Partial [CDKL5 cohort only]                                                 |                                                                        |                                                                                                                                                                                                                                                                                                                                               |   |                                            |   |                                          |   |                             |   |      |   |         |   |     |
| 4  | None                                                                        |                                                                        |                                                                                                                                                                                                                                                                                                                                               |   |                                            |   |                                          |   |                             |   |      |   |         |   |     |
| 6  | Unknown                                                                     |                                                                        |                                                                                                                                                                                                                                                                                                                                               |   |                                            |   |                                          |   |                             |   |      |   |         |   |     |
| 9  | N/A                                                                         |                                                                        |                                                                                                                                                                                                                                                                                                                                               |   |                                            |   |                                          |   |                             |   |      |   |         |   |     |
| 65 | [ <a href="#">pred_part6</a> ]<br>Show the field ONLY if:<br>[pred_6] = '3' | If partial response, please clarify:                                   | radio<br><table border="1"> <tr><td>1</td><td>&gt;50% reduction in spasms</td></tr> <tr><td>2</td><td>&lt; 50% reduction in spasms</td></tr> <tr><td>3</td><td>Unknown</td></tr> </table>                                                                                                                                                     | 1 | >50% reduction in spasms                   | 2 | < 50% reduction in spasms                | 3 | Unknown                     |   |      |   |         |   |     |
| 1  | >50% reduction in spasms                                                    |                                                                        |                                                                                                                                                                                                                                                                                                                                               |   |                                            |   |                                          |   |                             |   |      |   |         |   |     |
| 2  | < 50% reduction in spasms                                                   |                                                                        |                                                                                                                                                                                                                                                                                                                                               |   |                                            |   |                                          |   |                             |   |      |   |         |   |     |
| 3  | Unknown                                                                     |                                                                        |                                                                                                                                                                                                                                                                                                                                               |   |                                            |   |                                          |   |                             |   |      |   |         |   |     |
| 66 | [ <a href="#">pred_part7</a> ]<br>Show the field ONLY if:<br>[pred_6] = '3' | If partial response, please add any relevant notes:                    | notes                                                                                                                                                                                                                                                                                                                                         |   |                                            |   |                                          |   |                             |   |      |   |         |   |     |
| 67 | [ <a href="#">vgb</a> ]                                                     | Section Header: <i>Vigabatrin</i><br>Was vigabatrin used at any point? | radio<br><table border="1"> <tr><td>1</td><td>Yes</td></tr> <tr><td>2</td><td>No</td></tr> <tr><td>9</td><td>Unknown</td></tr> </table>                                                                                                                                                                                                       | 1 | Yes                                        | 2 | No                                       | 9 | Unknown                     |   |      |   |         |   |     |
| 1  | Yes                                                                         |                                                                        |                                                                                                                                                                                                                                                                                                                                               |   |                                            |   |                                          |   |                             |   |      |   |         |   |     |
| 2  | No                                                                          |                                                                        |                                                                                                                                                                                                                                                                                                                                               |   |                                            |   |                                          |   |                             |   |      |   |         |   |     |
| 9  | Unknown                                                                     |                                                                        |                                                                                                                                                                                                                                                                                                                                               |   |                                            |   |                                          |   |                             |   |      |   |         |   |     |
| 68 | [ <a href="#">vgb_1</a> ]<br>Show the field ONLY if:<br>[vgb] = '1'         | Was vigabatrin given as the first treatment for spasms?                | radio<br><table border="1"> <tr><td>1</td><td>Yes</td></tr> <tr><td>2</td><td>No</td></tr> <tr><td>9</td><td>Unknown</td></tr> </table>                                                                                                                                                                                                       | 1 | Yes                                        | 2 | No                                       | 9 | Unknown                     |   |      |   |         |   |     |
| 1  | Yes                                                                         |                                                                        |                                                                                                                                                                                                                                                                                                                                               |   |                                            |   |                                          |   |                             |   |      |   |         |   |     |
| 2  | No                                                                          |                                                                        |                                                                                                                                                                                                                                                                                                                                               |   |                                            |   |                                          |   |                             |   |      |   |         |   |     |
| 9  | Unknown                                                                     |                                                                        |                                                                                                                                                                                                                                                                                                                                               |   |                                            |   |                                          |   |                             |   |      |   |         |   |     |
| 69 | [ <a href="#">vgb_age</a> ]<br>Show the field ONLY if:<br>[vgb] = '1'       | Age at treatment (months)?<br><i>integer</i>                           | text (integer)                                                                                                                                                                                                                                                                                                                                |   |                                            |   |                                          |   |                             |   |      |   |         |   |     |

|    |                                                               |                                                                                   |                                                                                                                                                                                                                                                                                                                                                                                                           |   |                          |   |                             |   |                             |   |      |   |           |   |         |   |                                            |
|----|---------------------------------------------------------------|-----------------------------------------------------------------------------------|-----------------------------------------------------------------------------------------------------------------------------------------------------------------------------------------------------------------------------------------------------------------------------------------------------------------------------------------------------------------------------------------------------------|---|--------------------------|---|-----------------------------|---|-----------------------------|---|------|---|-----------|---|---------|---|--------------------------------------------|
| 70 | [ vgb_max ]<br>Show the field ONLY if:<br>[vgb] = '1'         | Max dose of vigabatrin (in mg/kg/d):<br>--- (mg/kg/d)                             | text (number_1dp)                                                                                                                                                                                                                                                                                                                                                                                         |   |                          |   |                             |   |                             |   |      |   |           |   |         |   |                                            |
| 71 | [ vgb_td ]<br>Show the field ONLY if:<br>[vgb] = '1'          | Time to max dose vigabatrin (days) or to VGB 150mg/kg/day:<br><i>integer</i>      | text (integer)                                                                                                                                                                                                                                                                                                                                                                                            |   |                          |   |                             |   |                             |   |      |   |           |   |         |   |                                            |
| 72 | [ vgb_clin ]<br>Show the field ONLY if:<br>[vgb] = '1'        | Day 14 response to vigabatrin (14 days from max dose), clinical observation only? | radio <table border="1"> <tr> <td>1</td> <td>Full 14-day response</td> </tr> <tr> <td>2</td> <td>Late response after 14 days</td> </tr> <tr> <td>3</td> <td>Partial [CDKL5 cohort only]</td> </tr> <tr> <td>4</td> <td>None</td> </tr> <tr> <td>5</td> <td>Worsening</td> </tr> <tr> <td>6</td> <td>Unknown</td> </tr> <tr> <td>9</td> <td>N/A, did not complete 14 days of treatment</td> </tr> </table> | 1 | Full 14-day response     | 2 | Late response after 14 days | 3 | Partial [CDKL5 cohort only] | 4 | None | 5 | Worsening | 6 | Unknown | 9 | N/A, did not complete 14 days of treatment |
| 1  | Full 14-day response                                          |                                                                                   |                                                                                                                                                                                                                                                                                                                                                                                                           |   |                          |   |                             |   |                             |   |      |   |           |   |         |   |                                            |
| 2  | Late response after 14 days                                   |                                                                                   |                                                                                                                                                                                                                                                                                                                                                                                                           |   |                          |   |                             |   |                             |   |      |   |           |   |         |   |                                            |
| 3  | Partial [CDKL5 cohort only]                                   |                                                                                   |                                                                                                                                                                                                                                                                                                                                                                                                           |   |                          |   |                             |   |                             |   |      |   |           |   |         |   |                                            |
| 4  | None                                                          |                                                                                   |                                                                                                                                                                                                                                                                                                                                                                                                           |   |                          |   |                             |   |                             |   |      |   |           |   |         |   |                                            |
| 5  | Worsening                                                     |                                                                                   |                                                                                                                                                                                                                                                                                                                                                                                                           |   |                          |   |                             |   |                             |   |      |   |           |   |         |   |                                            |
| 6  | Unknown                                                       |                                                                                   |                                                                                                                                                                                                                                                                                                                                                                                                           |   |                          |   |                             |   |                             |   |      |   |           |   |         |   |                                            |
| 9  | N/A, did not complete 14 days of treatment                    |                                                                                   |                                                                                                                                                                                                                                                                                                                                                                                                           |   |                          |   |                             |   |                             |   |      |   |           |   |         |   |                                            |
| 73 | [ vgb_part14 ]<br>Show the field ONLY if:<br>[vgb_clin] = '3' | If partial response, please clarify:                                              | radio <table border="1"> <tr> <td>1</td> <td>&gt;50% reduction in spasms</td> </tr> <tr> <td>2</td> <td>&lt; 50% reduction in spasms</td> </tr> <tr> <td>9</td> <td>Unknown</td> </tr> </table>                                                                                                                                                                                                           | 1 | >50% reduction in spasms | 2 | < 50% reduction in spasms   | 9 | Unknown                     |   |      |   |           |   |         |   |                                            |
| 1  | >50% reduction in spasms                                      |                                                                                   |                                                                                                                                                                                                                                                                                                                                                                                                           |   |                          |   |                             |   |                             |   |      |   |           |   |         |   |                                            |
| 2  | < 50% reduction in spasms                                     |                                                                                   |                                                                                                                                                                                                                                                                                                                                                                                                           |   |                          |   |                             |   |                             |   |      |   |           |   |         |   |                                            |
| 9  | Unknown                                                       |                                                                                   |                                                                                                                                                                                                                                                                                                                                                                                                           |   |                          |   |                             |   |                             |   |      |   |           |   |         |   |                                            |
| 74 | [ vgb_part15 ]<br>Show the field ONLY if:<br>[vgb_clin] = '3' | If partial response, please add any relevant notes:                               | notes                                                                                                                                                                                                                                                                                                                                                                                                     |   |                          |   |                             |   |                             |   |      |   |           |   |         |   |                                            |

|    |                                                                    |                                                                                      |                                                                                                                                                                                                                                                                                                                                                  |   |                                             |   |                                          |   |                             |   |      |   |           |   |         |   |     |
|----|--------------------------------------------------------------------|--------------------------------------------------------------------------------------|--------------------------------------------------------------------------------------------------------------------------------------------------------------------------------------------------------------------------------------------------------------------------------------------------------------------------------------------------|---|---------------------------------------------|---|------------------------------------------|---|-----------------------------|---|------|---|-----------|---|---------|---|-----|
| 75 | [ vgb_eeg ]<br>Show the field ONLY if:<br>[vgb] = '1'              | Day 14+ response to vigabatrin (from max dose), with follow-up EEG data?             | radio<br><table border="1"> <tr><td>1</td><td>Full 14-day response</td></tr> <tr><td>2</td><td>Late response after 14 days</td></tr> <tr><td>3</td><td>Partial [CDKL5 cohort only]</td></tr> <tr><td>4</td><td>None</td></tr> <tr><td>5</td><td>Worsening</td></tr> <tr><td>6</td><td>Unknown</td></tr> <tr><td>9</td><td>N/A</td></tr> </table> | 1 | Full 14-day response                        | 2 | Late response after 14 days              | 3 | Partial [CDKL5 cohort only] | 4 | None | 5 | Worsening | 6 | Unknown | 9 | N/A |
| 1  | Full 14-day response                                               |                                                                                      |                                                                                                                                                                                                                                                                                                                                                  |   |                                             |   |                                          |   |                             |   |      |   |           |   |         |   |     |
| 2  | Late response after 14 days                                        |                                                                                      |                                                                                                                                                                                                                                                                                                                                                  |   |                                             |   |                                          |   |                             |   |      |   |           |   |         |   |     |
| 3  | Partial [CDKL5 cohort only]                                        |                                                                                      |                                                                                                                                                                                                                                                                                                                                                  |   |                                             |   |                                          |   |                             |   |      |   |           |   |         |   |     |
| 4  | None                                                               |                                                                                      |                                                                                                                                                                                                                                                                                                                                                  |   |                                             |   |                                          |   |                             |   |      |   |           |   |         |   |     |
| 5  | Worsening                                                          |                                                                                      |                                                                                                                                                                                                                                                                                                                                                  |   |                                             |   |                                          |   |                             |   |      |   |           |   |         |   |     |
| 6  | Unknown                                                            |                                                                                      |                                                                                                                                                                                                                                                                                                                                                  |   |                                             |   |                                          |   |                             |   |      |   |           |   |         |   |     |
| 9  | N/A                                                                |                                                                                      |                                                                                                                                                                                                                                                                                                                                                  |   |                                             |   |                                          |   |                             |   |      |   |           |   |         |   |     |
| 76 | [ vgb_part14plus ]<br>Show the field ONLY if:<br>[vgb_eeg] = '3'   | If partial response, please clarify:                                                 | radio<br><table border="1"> <tr><td>1</td><td>&gt;50% reduction in spasms</td></tr> <tr><td>2</td><td>&lt; 50% reduction in spasms</td></tr> <tr><td>9</td><td>Unknown</td></tr> </table>                                                                                                                                                        | 1 | >50% reduction in spasms                    | 2 | < 50% reduction in spasms                | 9 | Unknown                     |   |      |   |           |   |         |   |     |
| 1  | >50% reduction in spasms                                           |                                                                                      |                                                                                                                                                                                                                                                                                                                                                  |   |                                             |   |                                          |   |                             |   |      |   |           |   |         |   |     |
| 2  | < 50% reduction in spasms                                          |                                                                                      |                                                                                                                                                                                                                                                                                                                                                  |   |                                             |   |                                          |   |                             |   |      |   |           |   |         |   |     |
| 9  | Unknown                                                            |                                                                                      |                                                                                                                                                                                                                                                                                                                                                  |   |                                             |   |                                          |   |                             |   |      |   |           |   |         |   |     |
| 77 | [ vgb_part14plus_2 ]<br>Show the field ONLY if:<br>[vgb_eeg] = '3' | If partial response, please add any relevant notes:                                  | notes                                                                                                                                                                                                                                                                                                                                            |   |                                             |   |                                          |   |                             |   |      |   |           |   |         |   |     |
| 78 | [ vgb_3 ]<br>Show the field ONLY if:<br>[vgb] = '1'                | Response at 3 months to vigabatrin, clinical observation?<br><i>EEG not required</i> | radio<br><table border="1"> <tr><td>1</td><td>Full, 14 day response sustained at 3 months</td></tr> <tr><td>2</td><td>Full late response sustained at 3 months</td></tr> <tr><td>3</td><td>Partial [CDKL5 cohort only]</td></tr> <tr><td>4</td><td>None</td></tr> <tr><td>6</td><td>Unknown</td></tr> <tr><td>9</td><td>N/A</td></tr> </table>   | 1 | Full, 14 day response sustained at 3 months | 2 | Full late response sustained at 3 months | 3 | Partial [CDKL5 cohort only] | 4 | None | 6 | Unknown   | 9 | N/A     |   |     |
| 1  | Full, 14 day response sustained at 3 months                        |                                                                                      |                                                                                                                                                                                                                                                                                                                                                  |   |                                             |   |                                          |   |                             |   |      |   |           |   |         |   |     |
| 2  | Full late response sustained at 3 months                           |                                                                                      |                                                                                                                                                                                                                                                                                                                                                  |   |                                             |   |                                          |   |                             |   |      |   |           |   |         |   |     |
| 3  | Partial [CDKL5 cohort only]                                        |                                                                                      |                                                                                                                                                                                                                                                                                                                                                  |   |                                             |   |                                          |   |                             |   |      |   |           |   |         |   |     |
| 4  | None                                                               |                                                                                      |                                                                                                                                                                                                                                                                                                                                                  |   |                                             |   |                                          |   |                             |   |      |   |           |   |         |   |     |
| 6  | Unknown                                                            |                                                                                      |                                                                                                                                                                                                                                                                                                                                                  |   |                                             |   |                                          |   |                             |   |      |   |           |   |         |   |     |
| 9  | N/A                                                                |                                                                                      |                                                                                                                                                                                                                                                                                                                                                  |   |                                             |   |                                          |   |                             |   |      |   |           |   |         |   |     |
| 79 | [ vgb_part3 ]<br>Show the field ONLY if:<br>[vgb_3] = '3'          | If partial response, please clarify:                                                 | radio<br><table border="1"> <tr><td>1</td><td>&gt;50% reduction in spasms</td></tr> <tr><td>2</td><td>&lt; 50% reduction in spasms</td></tr> <tr><td>9</td><td>Unknown</td></tr> </table>                                                                                                                                                        | 1 | >50% reduction in spasms                    | 2 | < 50% reduction in spasms                | 9 | Unknown                     |   |      |   |           |   |         |   |     |
| 1  | >50% reduction in spasms                                           |                                                                                      |                                                                                                                                                                                                                                                                                                                                                  |   |                                             |   |                                          |   |                             |   |      |   |           |   |         |   |     |
| 2  | < 50% reduction in spasms                                          |                                                                                      |                                                                                                                                                                                                                                                                                                                                                  |   |                                             |   |                                          |   |                             |   |      |   |           |   |         |   |     |
| 9  | Unknown                                                            |                                                                                      |                                                                                                                                                                                                                                                                                                                                                  |   |                                             |   |                                          |   |                             |   |      |   |           |   |         |   |     |

|    |                                                           |                                                                                                                                                |                                                                                                                                                                                                                                                                                                                                               |   |                                            |   |                                          |   |                             |   |      |   |         |   |     |
|----|-----------------------------------------------------------|------------------------------------------------------------------------------------------------------------------------------------------------|-----------------------------------------------------------------------------------------------------------------------------------------------------------------------------------------------------------------------------------------------------------------------------------------------------------------------------------------------|---|--------------------------------------------|---|------------------------------------------|---|-----------------------------|---|------|---|---------|---|-----|
| 80 | [ vgb_part4 ]<br>Show the field ONLY if:<br>[vgb_3] = '3' | If partial response, please add any relevant notes:                                                                                            | notes                                                                                                                                                                                                                                                                                                                                         |   |                                            |   |                                          |   |                             |   |      |   |         |   |     |
| 81 | [ vgb_6 ]<br>Show the field ONLY if:<br>[vgb] = '1'       | Spasm control at 6 months (clinical observation)?                                                                                              | radio<br><table border="1"> <tr><td>1</td><td>Full 14-day response sustained at 6 months</td></tr> <tr><td>2</td><td>Full late response sustained at 6 months</td></tr> <tr><td>3</td><td>Partial [CDKL5 cohort only]</td></tr> <tr><td>4</td><td>None</td></tr> <tr><td>6</td><td>Unknown</td></tr> <tr><td>9</td><td>N/A</td></tr> </table> | 1 | Full 14-day response sustained at 6 months | 2 | Full late response sustained at 6 months | 3 | Partial [CDKL5 cohort only] | 4 | None | 6 | Unknown | 9 | N/A |
| 1  | Full 14-day response sustained at 6 months                |                                                                                                                                                |                                                                                                                                                                                                                                                                                                                                               |   |                                            |   |                                          |   |                             |   |      |   |         |   |     |
| 2  | Full late response sustained at 6 months                  |                                                                                                                                                |                                                                                                                                                                                                                                                                                                                                               |   |                                            |   |                                          |   |                             |   |      |   |         |   |     |
| 3  | Partial [CDKL5 cohort only]                               |                                                                                                                                                |                                                                                                                                                                                                                                                                                                                                               |   |                                            |   |                                          |   |                             |   |      |   |         |   |     |
| 4  | None                                                      |                                                                                                                                                |                                                                                                                                                                                                                                                                                                                                               |   |                                            |   |                                          |   |                             |   |      |   |         |   |     |
| 6  | Unknown                                                   |                                                                                                                                                |                                                                                                                                                                                                                                                                                                                                               |   |                                            |   |                                          |   |                             |   |      |   |         |   |     |
| 9  | N/A                                                       |                                                                                                                                                |                                                                                                                                                                                                                                                                                                                                               |   |                                            |   |                                          |   |                             |   |      |   |         |   |     |
| 82 | [ vgb_part6 ]<br>Show the field ONLY if:<br>[vgb_6] = '3' | If partial response, please clarify:                                                                                                           | radio<br><table border="1"> <tr><td>1</td><td>&gt;50% reduction in spasms</td></tr> <tr><td>2</td><td>&lt; 50% reduction in spasms</td></tr> <tr><td>9</td><td>Unknown</td></tr> </table>                                                                                                                                                     | 1 | >50% reduction in spasms                   | 2 | < 50% reduction in spasms                | 9 | Unknown                     |   |      |   |         |   |     |
| 1  | >50% reduction in spasms                                  |                                                                                                                                                |                                                                                                                                                                                                                                                                                                                                               |   |                                            |   |                                          |   |                             |   |      |   |         |   |     |
| 2  | < 50% reduction in spasms                                 |                                                                                                                                                |                                                                                                                                                                                                                                                                                                                                               |   |                                            |   |                                          |   |                             |   |      |   |         |   |     |
| 9  | Unknown                                                   |                                                                                                                                                |                                                                                                                                                                                                                                                                                                                                               |   |                                            |   |                                          |   |                             |   |      |   |         |   |     |
| 83 | [ vgb_part7 ]<br>Show the field ONLY if:<br>[vgb_6] = '3' | If partial response, please add any relevant notes:                                                                                            | notes                                                                                                                                                                                                                                                                                                                                         |   |                                            |   |                                          |   |                             |   |      |   |         |   |     |
| 84 | [ vgbh ]                                                  | Section Header: <i>Combination Vigabatrin + Hormonal</i><br>Was vigabatrin + hormonal therapy (when started simultaneously) used at any point? | radio<br><table border="1"> <tr><td>1</td><td>Yes</td></tr> <tr><td>2</td><td>No</td></tr> <tr><td>9</td><td>Unknown</td></tr> </table>                                                                                                                                                                                                       | 1 | Yes                                        | 2 | No                                       | 9 | Unknown                     |   |      |   |         |   |     |
| 1  | Yes                                                       |                                                                                                                                                |                                                                                                                                                                                                                                                                                                                                               |   |                                            |   |                                          |   |                             |   |      |   |         |   |     |
| 2  | No                                                        |                                                                                                                                                |                                                                                                                                                                                                                                                                                                                                               |   |                                            |   |                                          |   |                             |   |      |   |         |   |     |
| 9  | Unknown                                                   |                                                                                                                                                |                                                                                                                                                                                                                                                                                                                                               |   |                                            |   |                                          |   |                             |   |      |   |         |   |     |
| 85 | [ vgbh_1 ]<br>Show the field ONLY if:<br>[vgbh] = '1'     | Was vigabatrin + ACTH/prednisolone given as the first treatment for spasms?                                                                    | radio<br><table border="1"> <tr><td>1</td><td>Yes</td></tr> <tr><td>2</td><td>No</td></tr> <tr><td>9</td><td>Unknown</td></tr> </table>                                                                                                                                                                                                       | 1 | Yes                                        | 2 | No                                       | 9 | Unknown                     |   |      |   |         |   |     |
| 1  | Yes                                                       |                                                                                                                                                |                                                                                                                                                                                                                                                                                                                                               |   |                                            |   |                                          |   |                             |   |      |   |         |   |     |
| 2  | No                                                        |                                                                                                                                                |                                                                                                                                                                                                                                                                                                                                               |   |                                            |   |                                          |   |                             |   |      |   |         |   |     |
| 9  | Unknown                                                   |                                                                                                                                                |                                                                                                                                                                                                                                                                                                                                               |   |                                            |   |                                          |   |                             |   |      |   |         |   |     |
| 86 | [ vgbh_age ]<br>Show the field ONLY if:<br>[vgbh] = '1'   | Age at treatment (months)?<br><i>integer</i>                                                                                                   | text (integer)                                                                                                                                                                                                                                                                                                                                |   |                                            |   |                                          |   |                             |   |      |   |         |   |     |



|    |                                                                         |                                                                                                                  |                                                                                                                                                                                                                                                                                                                                                                                                              |   |                          |   |                             |   |                             |   |      |   |           |   |         |   |                                            |
|----|-------------------------------------------------------------------------|------------------------------------------------------------------------------------------------------------------|--------------------------------------------------------------------------------------------------------------------------------------------------------------------------------------------------------------------------------------------------------------------------------------------------------------------------------------------------------------------------------------------------------------|---|--------------------------|---|-----------------------------|---|-----------------------------|---|------|---|-----------|---|---------|---|--------------------------------------------|
| 87 | [ <b>acth_or_pred</b> ]<br>Show the field ONLY if:<br>[vgbh] = '1'      | Which hormonal therapy was used with vigabatrin (when started simultaneously)?                                   | radio<br><table border="1"> <tr> <td>1</td> <td>ACTH</td> </tr> <tr> <td>2</td> <td>Prednisolone</td> </tr> </table>                                                                                                                                                                                                                                                                                         | 1 | ACTH                     | 2 | Prednisolone                |   |                             |   |      |   |           |   |         |   |                                            |
| 1  | ACTH                                                                    |                                                                                                                  |                                                                                                                                                                                                                                                                                                                                                                                                              |   |                          |   |                             |   |                             |   |      |   |           |   |         |   |                                            |
| 2  | Prednisolone                                                            |                                                                                                                  |                                                                                                                                                                                                                                                                                                                                                                                                              |   |                          |   |                             |   |                             |   |      |   |           |   |         |   |                                            |
| 88 | [ <b>vgbh_max</b> ]<br>Show the field ONLY if:<br>[vgbh] = '1'          | Max dose of vigabatrin (in mg/kg/d):<br>_ _ _ (mg/kg/d)                                                          | text (number_1dp)                                                                                                                                                                                                                                                                                                                                                                                            |   |                          |   |                             |   |                             |   |      |   |           |   |         |   |                                            |
| 89 | [ <b>vgbh_td</b> ]<br>Show the field ONLY if:<br>[vgbh] = '1'           | Time to max dose vigabatrin (days) or to VGB 150mg/kg/day:<br><i>integer</i>                                     | text (integer)                                                                                                                                                                                                                                                                                                                                                                                               |   |                          |   |                             |   |                             |   |      |   |           |   |         |   |                                            |
| 90 | [ <b>vgbh_acth</b> ]<br>Show the field ONLY if:<br>[acth_or_pred] = '1' | Max dose of ACTH (in units/m2)<br>_ _ _ (units/m2)                                                               | text (number_1dp)                                                                                                                                                                                                                                                                                                                                                                                            |   |                          |   |                             |   |                             |   |      |   |           |   |         |   |                                            |
| 91 | [ <b>vgbh_pred</b> ]<br>Show the field ONLY if:<br>[acth_or_pred] = '2' | Max dose of prednisolone (in mg/kg/d)<br>_ _ _ (mg/kg/d)                                                         | text (number_1dp)                                                                                                                                                                                                                                                                                                                                                                                            |   |                          |   |                             |   |                             |   |      |   |           |   |         |   |                                            |
| 92 | [ <b>vgbh_clin</b> ]<br>Show the field ONLY if:<br>[vgbh] = '1'         | Day 14 response to combination vigabatrin + hormonal therapy (14 days from max dose), clinical observation only? | radio<br><table border="1"> <tr> <td>1</td> <td>Full 14-day response</td> </tr> <tr> <td>2</td> <td>Late response after 14 days</td> </tr> <tr> <td>3</td> <td>Partial [CDKL5 cohort only]</td> </tr> <tr> <td>4</td> <td>None</td> </tr> <tr> <td>5</td> <td>Worsening</td> </tr> <tr> <td>6</td> <td>Unknown</td> </tr> <tr> <td>9</td> <td>N/A, did not complete 14 days of treatment</td> </tr> </table> | 1 | Full 14-day response     | 2 | Late response after 14 days | 3 | Partial [CDKL5 cohort only] | 4 | None | 5 | Worsening | 6 | Unknown | 9 | N/A, did not complete 14 days of treatment |
| 1  | Full 14-day response                                                    |                                                                                                                  |                                                                                                                                                                                                                                                                                                                                                                                                              |   |                          |   |                             |   |                             |   |      |   |           |   |         |   |                                            |
| 2  | Late response after 14 days                                             |                                                                                                                  |                                                                                                                                                                                                                                                                                                                                                                                                              |   |                          |   |                             |   |                             |   |      |   |           |   |         |   |                                            |
| 3  | Partial [CDKL5 cohort only]                                             |                                                                                                                  |                                                                                                                                                                                                                                                                                                                                                                                                              |   |                          |   |                             |   |                             |   |      |   |           |   |         |   |                                            |
| 4  | None                                                                    |                                                                                                                  |                                                                                                                                                                                                                                                                                                                                                                                                              |   |                          |   |                             |   |                             |   |      |   |           |   |         |   |                                            |
| 5  | Worsening                                                               |                                                                                                                  |                                                                                                                                                                                                                                                                                                                                                                                                              |   |                          |   |                             |   |                             |   |      |   |           |   |         |   |                                            |
| 6  | Unknown                                                                 |                                                                                                                  |                                                                                                                                                                                                                                                                                                                                                                                                              |   |                          |   |                             |   |                             |   |      |   |           |   |         |   |                                            |
| 9  | N/A, did not complete 14 days of treatment                              |                                                                                                                  |                                                                                                                                                                                                                                                                                                                                                                                                              |   |                          |   |                             |   |                             |   |      |   |           |   |         |   |                                            |
| 93 | [ <b>vgbh_part14</b> ]<br>Show the field ONLY if:<br>[vgbh_clin] = '3'  | If partial response, please clarify:                                                                             | radio<br><table border="1"> <tr> <td>1</td> <td>&gt;50% reduction in spasms</td> </tr> <tr> <td>2</td> <td>&lt; 50% reduction in spasms</td> </tr> <tr> <td>9</td> <td>Unknown</td> </tr> </table>                                                                                                                                                                                                           | 1 | >50% reduction in spasms | 2 | < 50% reduction in spasms   | 9 | Unknown                     |   |      |   |           |   |         |   |                                            |
| 1  | >50% reduction in spasms                                                |                                                                                                                  |                                                                                                                                                                                                                                                                                                                                                                                                              |   |                          |   |                             |   |                             |   |      |   |           |   |         |   |                                            |
| 2  | < 50% reduction in spasms                                               |                                                                                                                  |                                                                                                                                                                                                                                                                                                                                                                                                              |   |                          |   |                             |   |                             |   |      |   |           |   |         |   |                                            |
| 9  | Unknown                                                                 |                                                                                                                  |                                                                                                                                                                                                                                                                                                                                                                                                              |   |                          |   |                             |   |                             |   |      |   |           |   |         |   |                                            |

|    |                                                                      |                                                                                                                     |                                                                                                                                                                                                                                                                                                                                                  |   |                                            |   |                                          |   |                             |   |      |   |           |   |         |   |     |
|----|----------------------------------------------------------------------|---------------------------------------------------------------------------------------------------------------------|--------------------------------------------------------------------------------------------------------------------------------------------------------------------------------------------------------------------------------------------------------------------------------------------------------------------------------------------------|---|--------------------------------------------|---|------------------------------------------|---|-----------------------------|---|------|---|-----------|---|---------|---|-----|
| 94 | [ vgbh_part15 ]<br>Show the field ONLY if:<br>[vgbh_clin] = '3'      | If partial response, please add any relevant notes:                                                                 | notes                                                                                                                                                                                                                                                                                                                                            |   |                                            |   |                                          |   |                             |   |      |   |           |   |         |   |     |
| 95 | [ vgbh_eeg ]<br>Show the field ONLY if:<br>[vgbh] = '1'              | Day 14+ response to combination vigabatrin + hormonal therapy (from max dose), with follow-up EEG data?             | radio<br><table border="1"> <tr><td>1</td><td>Full 14-day response</td></tr> <tr><td>2</td><td>Late response after 14 days</td></tr> <tr><td>3</td><td>Partial [CDKL5 cohort only]</td></tr> <tr><td>4</td><td>None</td></tr> <tr><td>5</td><td>Worsening</td></tr> <tr><td>6</td><td>Unknown</td></tr> <tr><td>9</td><td>N/A</td></tr> </table> | 1 | Full 14-day response                       | 2 | Late response after 14 days              | 3 | Partial [CDKL5 cohort only] | 4 | None | 5 | Worsening | 6 | Unknown | 9 | N/A |
| 1  | Full 14-day response                                                 |                                                                                                                     |                                                                                                                                                                                                                                                                                                                                                  |   |                                            |   |                                          |   |                             |   |      |   |           |   |         |   |     |
| 2  | Late response after 14 days                                          |                                                                                                                     |                                                                                                                                                                                                                                                                                                                                                  |   |                                            |   |                                          |   |                             |   |      |   |           |   |         |   |     |
| 3  | Partial [CDKL5 cohort only]                                          |                                                                                                                     |                                                                                                                                                                                                                                                                                                                                                  |   |                                            |   |                                          |   |                             |   |      |   |           |   |         |   |     |
| 4  | None                                                                 |                                                                                                                     |                                                                                                                                                                                                                                                                                                                                                  |   |                                            |   |                                          |   |                             |   |      |   |           |   |         |   |     |
| 5  | Worsening                                                            |                                                                                                                     |                                                                                                                                                                                                                                                                                                                                                  |   |                                            |   |                                          |   |                             |   |      |   |           |   |         |   |     |
| 6  | Unknown                                                              |                                                                                                                     |                                                                                                                                                                                                                                                                                                                                                  |   |                                            |   |                                          |   |                             |   |      |   |           |   |         |   |     |
| 9  | N/A                                                                  |                                                                                                                     |                                                                                                                                                                                                                                                                                                                                                  |   |                                            |   |                                          |   |                             |   |      |   |           |   |         |   |     |
| 96 | [ vgbh_part14plus ]<br>Show the field ONLY if:<br>[vgbh_eeg] = '3'   | If partial response, please clarify:                                                                                | radio<br><table border="1"> <tr><td>1</td><td>&gt;50% reduction in spasms</td></tr> <tr><td>2</td><td>&lt; 50% reduction in spasms</td></tr> <tr><td>9</td><td>Unknown</td></tr> </table>                                                                                                                                                        | 1 | >50% reduction in spasms                   | 2 | < 50% reduction in spasms                | 9 | Unknown                     |   |      |   |           |   |         |   |     |
| 1  | >50% reduction in spasms                                             |                                                                                                                     |                                                                                                                                                                                                                                                                                                                                                  |   |                                            |   |                                          |   |                             |   |      |   |           |   |         |   |     |
| 2  | < 50% reduction in spasms                                            |                                                                                                                     |                                                                                                                                                                                                                                                                                                                                                  |   |                                            |   |                                          |   |                             |   |      |   |           |   |         |   |     |
| 9  | Unknown                                                              |                                                                                                                     |                                                                                                                                                                                                                                                                                                                                                  |   |                                            |   |                                          |   |                             |   |      |   |           |   |         |   |     |
| 97 | [ vgbh_part14plus_2 ]<br>Show the field ONLY if:<br>[vgbh_eeg] = '3' | If partial response, please add any relevant notes:                                                                 | notes                                                                                                                                                                                                                                                                                                                                            |   |                                            |   |                                          |   |                             |   |      |   |           |   |         |   |     |
| 98 | [ vgbh_3 ]<br>Show the field ONLY if:<br>[vgbh] = '1'                | Response at 3 months to combination vigabatrin + hormonal therapy, clinical observation?<br><i>EEG not required</i> | radio<br><table border="1"> <tr><td>1</td><td>Full 14-day response sustained at 3 months</td></tr> <tr><td>2</td><td>Full late response sustained at 3 months</td></tr> <tr><td>3</td><td>Partial [CDKL5 cohort only]</td></tr> <tr><td>4</td><td>None</td></tr> <tr><td>6</td><td>Unknown</td></tr> <tr><td>9</td><td>N/A</td></tr> </table>    | 1 | Full 14-day response sustained at 3 months | 2 | Full late response sustained at 3 months | 3 | Partial [CDKL5 cohort only] | 4 | None | 6 | Unknown   | 9 | N/A     |   |     |
| 1  | Full 14-day response sustained at 3 months                           |                                                                                                                     |                                                                                                                                                                                                                                                                                                                                                  |   |                                            |   |                                          |   |                             |   |      |   |           |   |         |   |     |
| 2  | Full late response sustained at 3 months                             |                                                                                                                     |                                                                                                                                                                                                                                                                                                                                                  |   |                                            |   |                                          |   |                             |   |      |   |           |   |         |   |     |
| 3  | Partial [CDKL5 cohort only]                                          |                                                                                                                     |                                                                                                                                                                                                                                                                                                                                                  |   |                                            |   |                                          |   |                             |   |      |   |           |   |         |   |     |
| 4  | None                                                                 |                                                                                                                     |                                                                                                                                                                                                                                                                                                                                                  |   |                                            |   |                                          |   |                             |   |      |   |           |   |         |   |     |
| 6  | Unknown                                                              |                                                                                                                     |                                                                                                                                                                                                                                                                                                                                                  |   |                                            |   |                                          |   |                             |   |      |   |           |   |         |   |     |
| 9  | N/A                                                                  |                                                                                                                     |                                                                                                                                                                                                                                                                                                                                                  |   |                                            |   |                                          |   |                             |   |      |   |           |   |         |   |     |

|     |                                                                             |                                                                                                                                                                                                                                     |                                                                                                                                                                                                                                                                                                                                                                 |   |                                            |   |                                          |   |                             |   |      |   |         |   |     |
|-----|-----------------------------------------------------------------------------|-------------------------------------------------------------------------------------------------------------------------------------------------------------------------------------------------------------------------------------|-----------------------------------------------------------------------------------------------------------------------------------------------------------------------------------------------------------------------------------------------------------------------------------------------------------------------------------------------------------------|---|--------------------------------------------|---|------------------------------------------|---|-----------------------------|---|------|---|---------|---|-----|
| 99  | [ <a href="#">vgbh_part3</a> ]<br>Show the field ONLY if:<br>[vgbh_3] = '3' | If partial response, please clarify:                                                                                                                                                                                                | radio<br><table border="1"> <tr> <td>1</td> <td>&gt;50% reduction in spasms</td> </tr> <tr> <td>2</td> <td>&lt; 50% reduction in spasms</td> </tr> <tr> <td>9</td> <td>Unknown</td> </tr> </table>                                                                                                                                                              | 1 | >50% reduction in spasms                   | 2 | < 50% reduction in spasms                | 9 | Unknown                     |   |      |   |         |   |     |
| 1   | >50% reduction in spasms                                                    |                                                                                                                                                                                                                                     |                                                                                                                                                                                                                                                                                                                                                                 |   |                                            |   |                                          |   |                             |   |      |   |         |   |     |
| 2   | < 50% reduction in spasms                                                   |                                                                                                                                                                                                                                     |                                                                                                                                                                                                                                                                                                                                                                 |   |                                            |   |                                          |   |                             |   |      |   |         |   |     |
| 9   | Unknown                                                                     |                                                                                                                                                                                                                                     |                                                                                                                                                                                                                                                                                                                                                                 |   |                                            |   |                                          |   |                             |   |      |   |         |   |     |
| 100 | [ <a href="#">vgbh_part4</a> ]<br>Show the field ONLY if:<br>[vgbh_3] = '3' | If partial response, please add any relevant notes:                                                                                                                                                                                 | notes                                                                                                                                                                                                                                                                                                                                                           |   |                                            |   |                                          |   |                             |   |      |   |         |   |     |
| 101 | [ <a href="#">vgbh_6</a> ]<br>Show the field ONLY if:<br>[vgbh] = '1'       | Spasm control at 6 months (clinical observation)?                                                                                                                                                                                   | radio<br><table border="1"> <tr> <td>1</td> <td>Full 14-day response sustained at 6 months</td> </tr> <tr> <td>2</td> <td>Full late response sustained at 6 months</td> </tr> <tr> <td>3</td> <td>Partial [CDKL5 cohort only]</td> </tr> <tr> <td>4</td> <td>None</td> </tr> <tr> <td>6</td> <td>Unknown</td> </tr> <tr> <td>9</td> <td>N/A</td> </tr> </table> | 1 | Full 14-day response sustained at 6 months | 2 | Full late response sustained at 6 months | 3 | Partial [CDKL5 cohort only] | 4 | None | 6 | Unknown | 9 | N/A |
| 1   | Full 14-day response sustained at 6 months                                  |                                                                                                                                                                                                                                     |                                                                                                                                                                                                                                                                                                                                                                 |   |                                            |   |                                          |   |                             |   |      |   |         |   |     |
| 2   | Full late response sustained at 6 months                                    |                                                                                                                                                                                                                                     |                                                                                                                                                                                                                                                                                                                                                                 |   |                                            |   |                                          |   |                             |   |      |   |         |   |     |
| 3   | Partial [CDKL5 cohort only]                                                 |                                                                                                                                                                                                                                     |                                                                                                                                                                                                                                                                                                                                                                 |   |                                            |   |                                          |   |                             |   |      |   |         |   |     |
| 4   | None                                                                        |                                                                                                                                                                                                                                     |                                                                                                                                                                                                                                                                                                                                                                 |   |                                            |   |                                          |   |                             |   |      |   |         |   |     |
| 6   | Unknown                                                                     |                                                                                                                                                                                                                                     |                                                                                                                                                                                                                                                                                                                                                                 |   |                                            |   |                                          |   |                             |   |      |   |         |   |     |
| 9   | N/A                                                                         |                                                                                                                                                                                                                                     |                                                                                                                                                                                                                                                                                                                                                                 |   |                                            |   |                                          |   |                             |   |      |   |         |   |     |
| 102 | [ <a href="#">vgbh_part6</a> ]<br>Show the field ONLY if:<br>[vgbh_6] = '3' | If partial response, please clarify:                                                                                                                                                                                                | radio<br><table border="1"> <tr> <td>1</td> <td>&gt;50% reduction in spasms</td> </tr> <tr> <td>2</td> <td>&lt; 50% reduction in spasms</td> </tr> <tr> <td>9</td> <td>Unknown</td> </tr> </table>                                                                                                                                                              | 1 | >50% reduction in spasms                   | 2 | < 50% reduction in spasms                | 9 | Unknown                     |   |      |   |         |   |     |
| 1   | >50% reduction in spasms                                                    |                                                                                                                                                                                                                                     |                                                                                                                                                                                                                                                                                                                                                                 |   |                                            |   |                                          |   |                             |   |      |   |         |   |     |
| 2   | < 50% reduction in spasms                                                   |                                                                                                                                                                                                                                     |                                                                                                                                                                                                                                                                                                                                                                 |   |                                            |   |                                          |   |                             |   |      |   |         |   |     |
| 9   | Unknown                                                                     |                                                                                                                                                                                                                                     |                                                                                                                                                                                                                                                                                                                                                                 |   |                                            |   |                                          |   |                             |   |      |   |         |   |     |
| 103 | [ <a href="#">vgbh_part7</a> ]<br>Show the field ONLY if:<br>[vgbh_6] = '3' | If partial response, please add any relevant notes:                                                                                                                                                                                 | notes                                                                                                                                                                                                                                                                                                                                                           |   |                                            |   |                                          |   |                             |   |      |   |         |   |     |
| 104 | [ <a href="#">keto</a> ]                                                    | Section Header: <i>Ketogenic Diet</i><br>Was the ketogenic diet used within 3 months of spasms onset?<br>(assessed at 1 month after initiation)<br><i>Only answer "Yes" if diet was started within three months of spasms onset</i> | radio<br><table border="1"> <tr> <td>1</td> <td>Yes</td> </tr> <tr> <td>2</td> <td>No</td> </tr> <tr> <td>9</td> <td>Unknown</td> </tr> </table>                                                                                                                                                                                                                | 1 | Yes                                        | 2 | No                                       | 9 | Unknown                     |   |      |   |         |   |     |
| 1   | Yes                                                                         |                                                                                                                                                                                                                                     |                                                                                                                                                                                                                                                                                                                                                                 |   |                                            |   |                                          |   |                             |   |      |   |         |   |     |
| 2   | No                                                                          |                                                                                                                                                                                                                                     |                                                                                                                                                                                                                                                                                                                                                                 |   |                                            |   |                                          |   |                             |   |      |   |         |   |     |
| 9   | Unknown                                                                     |                                                                                                                                                                                                                                     |                                                                                                                                                                                                                                                                                                                                                                 |   |                                            |   |                                          |   |                             |   |      |   |         |   |     |

|     |                                                                 |                                                                              |                                                                                                                                                                                                                                                                                                                                           |   |                          |   |                             |   |                             |   |      |   |           |   |         |   |     |
|-----|-----------------------------------------------------------------|------------------------------------------------------------------------------|-------------------------------------------------------------------------------------------------------------------------------------------------------------------------------------------------------------------------------------------------------------------------------------------------------------------------------------------|---|--------------------------|---|-----------------------------|---|-----------------------------|---|------|---|-----------|---|---------|---|-----|
| 105 | [ keto_start ]<br>Show the field ONLY if:<br>[keto] = '1'       | After how many 1st line treatments was it initiated?                         | radio<br><table border="1"> <tr><td>0</td><td>0</td></tr> <tr><td>1</td><td>1</td></tr> <tr><td>2</td><td>2</td></tr> <tr><td>3</td><td>3</td></tr> </table>                                                                                                                                                                              | 0 | 0                        | 1 | 1                           | 2 | 2                           | 3 | 3    |   |           |   |         |   |     |
| 0   | 0                                                               |                                                                              |                                                                                                                                                                                                                                                                                                                                           |   |                          |   |                             |   |                             |   |      |   |           |   |         |   |     |
| 1   | 1                                                               |                                                                              |                                                                                                                                                                                                                                                                                                                                           |   |                          |   |                             |   |                             |   |      |   |           |   |         |   |     |
| 2   | 2                                                               |                                                                              |                                                                                                                                                                                                                                                                                                                                           |   |                          |   |                             |   |                             |   |      |   |           |   |         |   |     |
| 3   | 3                                                               |                                                                              |                                                                                                                                                                                                                                                                                                                                           |   |                          |   |                             |   |                             |   |      |   |           |   |         |   |     |
| 106 | [ keto_age ]<br>Show the field ONLY if:<br>[keto] = '1'         | Age at treatment (months)?<br><i>integer</i>                                 | text (integer)                                                                                                                                                                                                                                                                                                                            |   |                          |   |                             |   |                             |   |      |   |           |   |         |   |     |
| 107 | [ keto_ratio ]<br>Show the field ONLY if:<br>[keto] = '1'       | Maintenance ratio:<br><i>e.g. 3:1</i>                                        | text                                                                                                                                                                                                                                                                                                                                      |   |                          |   |                             |   |                             |   |      |   |           |   |         |   |     |
| 108 | [ keto_clin ]<br>Show the field ONLY if:<br>[keto] = '1'        | 1-month response after ketogenic diet initiation, clinical observation only? | radio<br><table border="1"> <tr><td>1</td><td>Full response</td></tr> <tr><td>2</td><td>Late response after 1 month</td></tr> <tr><td>3</td><td>Partial [CDKL5 cohort only]</td></tr> <tr><td>4</td><td>None</td></tr> <tr><td>5</td><td>Worsening</td></tr> <tr><td>6</td><td>Unknown</td></tr> <tr><td>9</td><td>N/A</td></tr> </table> | 1 | Full response            | 2 | Late response after 1 month | 3 | Partial [CDKL5 cohort only] | 4 | None | 5 | Worsening | 6 | Unknown | 9 | N/A |
| 1   | Full response                                                   |                                                                              |                                                                                                                                                                                                                                                                                                                                           |   |                          |   |                             |   |                             |   |      |   |           |   |         |   |     |
| 2   | Late response after 1 month                                     |                                                                              |                                                                                                                                                                                                                                                                                                                                           |   |                          |   |                             |   |                             |   |      |   |           |   |         |   |     |
| 3   | Partial [CDKL5 cohort only]                                     |                                                                              |                                                                                                                                                                                                                                                                                                                                           |   |                          |   |                             |   |                             |   |      |   |           |   |         |   |     |
| 4   | None                                                            |                                                                              |                                                                                                                                                                                                                                                                                                                                           |   |                          |   |                             |   |                             |   |      |   |           |   |         |   |     |
| 5   | Worsening                                                       |                                                                              |                                                                                                                                                                                                                                                                                                                                           |   |                          |   |                             |   |                             |   |      |   |           |   |         |   |     |
| 6   | Unknown                                                         |                                                                              |                                                                                                                                                                                                                                                                                                                                           |   |                          |   |                             |   |                             |   |      |   |           |   |         |   |     |
| 9   | N/A                                                             |                                                                              |                                                                                                                                                                                                                                                                                                                                           |   |                          |   |                             |   |                             |   |      |   |           |   |         |   |     |
| 109 | [ keto_part14 ]<br>Show the field ONLY if:<br>[keto_clin] = '3' | If partial response, please clarify:                                         | radio<br><table border="1"> <tr><td>1</td><td>&gt;50% reduction in spasms</td></tr> <tr><td>2</td><td>&lt; 50% reduction in spasms</td></tr> <tr><td>9</td><td>Unknown</td></tr> </table>                                                                                                                                                 | 1 | >50% reduction in spasms | 2 | < 50% reduction in spasms   | 9 | Unknown                     |   |      |   |           |   |         |   |     |
| 1   | >50% reduction in spasms                                        |                                                                              |                                                                                                                                                                                                                                                                                                                                           |   |                          |   |                             |   |                             |   |      |   |           |   |         |   |     |
| 2   | < 50% reduction in spasms                                       |                                                                              |                                                                                                                                                                                                                                                                                                                                           |   |                          |   |                             |   |                             |   |      |   |           |   |         |   |     |
| 9   | Unknown                                                         |                                                                              |                                                                                                                                                                                                                                                                                                                                           |   |                          |   |                             |   |                             |   |      |   |           |   |         |   |     |
| 110 | [ keto_part15 ]<br>Show the field ONLY if:<br>[keto_clin] = '3' | If partial response, please add any relevant notes:                          | notes                                                                                                                                                                                                                                                                                                                                     |   |                          |   |                             |   |                             |   |      |   |           |   |         |   |     |

|     |                                                                      |                                                                                          |                                                                                                                                                                                                                                                                                                                                                |   |                                             |   |                                          |   |                             |   |      |   |           |   |         |   |     |
|-----|----------------------------------------------------------------------|------------------------------------------------------------------------------------------|------------------------------------------------------------------------------------------------------------------------------------------------------------------------------------------------------------------------------------------------------------------------------------------------------------------------------------------------|---|---------------------------------------------|---|------------------------------------------|---|-----------------------------|---|------|---|-----------|---|---------|---|-----|
| 111 | [ keto_eeg ]<br>Show the field ONLY if:<br>[keto] = '1'              | 1-month response after ketogenic diet initiation, with follow-up EEG?                    | radio<br><table border="1"> <tr><td>1</td><td>Full response</td></tr> <tr><td>2</td><td>Late response after 1 month</td></tr> <tr><td>3</td><td>Partial [CDKL5 cohort only]</td></tr> <tr><td>4</td><td>None</td></tr> <tr><td>5</td><td>Worsening</td></tr> <tr><td>6</td><td>Unknown</td></tr> <tr><td>9</td><td>N/A</td></tr> </table>      | 1 | Full response                               | 2 | Late response after 1 month              | 3 | Partial [CDKL5 cohort only] | 4 | None | 5 | Worsening | 6 | Unknown | 9 | N/A |
| 1   | Full response                                                        |                                                                                          |                                                                                                                                                                                                                                                                                                                                                |   |                                             |   |                                          |   |                             |   |      |   |           |   |         |   |     |
| 2   | Late response after 1 month                                          |                                                                                          |                                                                                                                                                                                                                                                                                                                                                |   |                                             |   |                                          |   |                             |   |      |   |           |   |         |   |     |
| 3   | Partial [CDKL5 cohort only]                                          |                                                                                          |                                                                                                                                                                                                                                                                                                                                                |   |                                             |   |                                          |   |                             |   |      |   |           |   |         |   |     |
| 4   | None                                                                 |                                                                                          |                                                                                                                                                                                                                                                                                                                                                |   |                                             |   |                                          |   |                             |   |      |   |           |   |         |   |     |
| 5   | Worsening                                                            |                                                                                          |                                                                                                                                                                                                                                                                                                                                                |   |                                             |   |                                          |   |                             |   |      |   |           |   |         |   |     |
| 6   | Unknown                                                              |                                                                                          |                                                                                                                                                                                                                                                                                                                                                |   |                                             |   |                                          |   |                             |   |      |   |           |   |         |   |     |
| 9   | N/A                                                                  |                                                                                          |                                                                                                                                                                                                                                                                                                                                                |   |                                             |   |                                          |   |                             |   |      |   |           |   |         |   |     |
| 112 | [ keto_part14plus ]<br>Show the field ONLY if:<br>[keto_eeg] = '3'   | If partial response, please clarify:                                                     | radio<br><table border="1"> <tr><td>1</td><td>&gt;50% reduction in spasms</td></tr> <tr><td>2</td><td>&lt; 50% reduction in spasms</td></tr> <tr><td>3</td><td>Unknown</td></tr> </table>                                                                                                                                                      | 1 | >50% reduction in spasms                    | 2 | < 50% reduction in spasms                | 3 | Unknown                     |   |      |   |           |   |         |   |     |
| 1   | >50% reduction in spasms                                             |                                                                                          |                                                                                                                                                                                                                                                                                                                                                |   |                                             |   |                                          |   |                             |   |      |   |           |   |         |   |     |
| 2   | < 50% reduction in spasms                                            |                                                                                          |                                                                                                                                                                                                                                                                                                                                                |   |                                             |   |                                          |   |                             |   |      |   |           |   |         |   |     |
| 3   | Unknown                                                              |                                                                                          |                                                                                                                                                                                                                                                                                                                                                |   |                                             |   |                                          |   |                             |   |      |   |           |   |         |   |     |
| 113 | [ keto_part14plus_2 ]<br>Show the field ONLY if:<br>[keto_eeg] = '3' | If partial response, please add any relevant notes:                                      | notes                                                                                                                                                                                                                                                                                                                                          |   |                                             |   |                                          |   |                             |   |      |   |           |   |         |   |     |
| 114 | [ keto_3 ]<br>Show the field ONLY if:<br>[keto] = '1'                | Response at 3 months to ketogenic diet, clinical observation?<br><i>EEG not required</i> | radio<br><table border="1"> <tr><td>1</td><td>Full 1-month response sustained at 3 months</td></tr> <tr><td>2</td><td>Full late response sustained at 3 months</td></tr> <tr><td>3</td><td>Partial [CDKL5 cohort only]</td></tr> <tr><td>4</td><td>None</td></tr> <tr><td>6</td><td>Unknown</td></tr> <tr><td>9</td><td>N/A</td></tr> </table> | 1 | Full 1-month response sustained at 3 months | 2 | Full late response sustained at 3 months | 3 | Partial [CDKL5 cohort only] | 4 | None | 6 | Unknown   | 9 | N/A     |   |     |
| 1   | Full 1-month response sustained at 3 months                          |                                                                                          |                                                                                                                                                                                                                                                                                                                                                |   |                                             |   |                                          |   |                             |   |      |   |           |   |         |   |     |
| 2   | Full late response sustained at 3 months                             |                                                                                          |                                                                                                                                                                                                                                                                                                                                                |   |                                             |   |                                          |   |                             |   |      |   |           |   |         |   |     |
| 3   | Partial [CDKL5 cohort only]                                          |                                                                                          |                                                                                                                                                                                                                                                                                                                                                |   |                                             |   |                                          |   |                             |   |      |   |           |   |         |   |     |
| 4   | None                                                                 |                                                                                          |                                                                                                                                                                                                                                                                                                                                                |   |                                             |   |                                          |   |                             |   |      |   |           |   |         |   |     |
| 6   | Unknown                                                              |                                                                                          |                                                                                                                                                                                                                                                                                                                                                |   |                                             |   |                                          |   |                             |   |      |   |           |   |         |   |     |
| 9   | N/A                                                                  |                                                                                          |                                                                                                                                                                                                                                                                                                                                                |   |                                             |   |                                          |   |                             |   |      |   |           |   |         |   |     |
| 115 | [ keto_part3 ]<br>Show the field ONLY if:<br>[keto_3] = '3'          | If partial response, please clarify:                                                     | radio<br><table border="1"> <tr><td>1</td><td>&gt;50% reduction in spasms</td></tr> <tr><td>2</td><td>&lt; 50% reduction in spasms</td></tr> <tr><td>9</td><td>Unknown</td></tr> </table>                                                                                                                                                      | 1 | >50% reduction in spasms                    | 2 | < 50% reduction in spasms                | 9 | Unknown                     |   |      |   |           |   |         |   |     |
| 1   | >50% reduction in spasms                                             |                                                                                          |                                                                                                                                                                                                                                                                                                                                                |   |                                             |   |                                          |   |                             |   |      |   |           |   |         |   |     |
| 2   | < 50% reduction in spasms                                            |                                                                                          |                                                                                                                                                                                                                                                                                                                                                |   |                                             |   |                                          |   |                             |   |      |   |           |   |         |   |     |
| 9   | Unknown                                                              |                                                                                          |                                                                                                                                                                                                                                                                                                                                                |   |                                             |   |                                          |   |                             |   |      |   |           |   |         |   |     |

|     |                                                                     |                                                                                    |                                                                                                                                                                                                                                                                                                                                        |   |                                     |   |                                          |   |                             |   |      |   |         |   |     |
|-----|---------------------------------------------------------------------|------------------------------------------------------------------------------------|----------------------------------------------------------------------------------------------------------------------------------------------------------------------------------------------------------------------------------------------------------------------------------------------------------------------------------------|---|-------------------------------------|---|------------------------------------------|---|-----------------------------|---|------|---|---------|---|-----|
| 116 | [ keto_part4 ]<br>Show the field ONLY if:<br>[keto_3] = '3'         | If partial response, please add any relevant notes:                                | notes                                                                                                                                                                                                                                                                                                                                  |   |                                     |   |                                          |   |                             |   |      |   |         |   |     |
| 117 | [ keto_6 ]<br>Show the field ONLY if:<br>[keto] = '1'               | Spasm control at 6 months (clinical observation)?                                  | radio<br><table border="1"> <tr><td>1</td><td>Full response sustained at 6 months</td></tr> <tr><td>2</td><td>Full late response sustained at 6 months</td></tr> <tr><td>3</td><td>Partial [CDKL5 cohort only]</td></tr> <tr><td>4</td><td>None</td></tr> <tr><td>6</td><td>Unknown</td></tr> <tr><td>9</td><td>N/A</td></tr> </table> | 1 | Full response sustained at 6 months | 2 | Full late response sustained at 6 months | 3 | Partial [CDKL5 cohort only] | 4 | None | 6 | Unknown | 9 | N/A |
| 1   | Full response sustained at 6 months                                 |                                                                                    |                                                                                                                                                                                                                                                                                                                                        |   |                                     |   |                                          |   |                             |   |      |   |         |   |     |
| 2   | Full late response sustained at 6 months                            |                                                                                    |                                                                                                                                                                                                                                                                                                                                        |   |                                     |   |                                          |   |                             |   |      |   |         |   |     |
| 3   | Partial [CDKL5 cohort only]                                         |                                                                                    |                                                                                                                                                                                                                                                                                                                                        |   |                                     |   |                                          |   |                             |   |      |   |         |   |     |
| 4   | None                                                                |                                                                                    |                                                                                                                                                                                                                                                                                                                                        |   |                                     |   |                                          |   |                             |   |      |   |         |   |     |
| 6   | Unknown                                                             |                                                                                    |                                                                                                                                                                                                                                                                                                                                        |   |                                     |   |                                          |   |                             |   |      |   |         |   |     |
| 9   | N/A                                                                 |                                                                                    |                                                                                                                                                                                                                                                                                                                                        |   |                                     |   |                                          |   |                             |   |      |   |         |   |     |
| 118 | [ keto_part6 ]<br>Show the field ONLY if:<br>[keto_6] = '3'         | If partial response, please clarify:                                               | radio<br><table border="1"> <tr><td>1</td><td>&gt;50% reduction in spasms</td></tr> <tr><td>2</td><td>&lt; 50% reduction in spasms</td></tr> <tr><td>9</td><td>Unknown</td></tr> </table>                                                                                                                                              | 1 | >50% reduction in spasms            | 2 | < 50% reduction in spasms                | 9 | Unknown                     |   |      |   |         |   |     |
| 1   | >50% reduction in spasms                                            |                                                                                    |                                                                                                                                                                                                                                                                                                                                        |   |                                     |   |                                          |   |                             |   |      |   |         |   |     |
| 2   | < 50% reduction in spasms                                           |                                                                                    |                                                                                                                                                                                                                                                                                                                                        |   |                                     |   |                                          |   |                             |   |      |   |         |   |     |
| 9   | Unknown                                                             |                                                                                    |                                                                                                                                                                                                                                                                                                                                        |   |                                     |   |                                          |   |                             |   |      |   |         |   |     |
| 119 | [ keto_part7 ]<br>Show the field ONLY if:<br>[keto_6] = '3'         | If partial response, please add any relevant notes:                                | notes                                                                                                                                                                                                                                                                                                                                  |   |                                     |   |                                          |   |                             |   |      |   |         |   |     |
| 120 | [ keto_late ]                                                       | Late use of keto: Was the ketogenic diet initiated after 3 months of spasms onset? | radio<br><table border="1"> <tr><td>1</td><td>Yes</td></tr> <tr><td>2</td><td>No</td></tr> <tr><td>3</td><td>Unknown</td></tr> </table>                                                                                                                                                                                                | 1 | Yes                                 | 2 | No                                       | 3 | Unknown                     |   |      |   |         |   |     |
| 1   | Yes                                                                 |                                                                                    |                                                                                                                                                                                                                                                                                                                                        |   |                                     |   |                                          |   |                             |   |      |   |         |   |     |
| 2   | No                                                                  |                                                                                    |                                                                                                                                                                                                                                                                                                                                        |   |                                     |   |                                          |   |                             |   |      |   |         |   |     |
| 3   | Unknown                                                             |                                                                                    |                                                                                                                                                                                                                                                                                                                                        |   |                                     |   |                                          |   |                             |   |      |   |         |   |     |
| 121 | [ keto_late_start ]<br>Show the field ONLY if:<br>[keto_late] = '1' | After how many 1st line treatments was it initiated?                               | radio<br><table border="1"> <tr><td>0</td><td>0</td></tr> <tr><td>1</td><td>1</td></tr> <tr><td>2</td><td>2</td></tr> <tr><td>3</td><td>3</td></tr> </table>                                                                                                                                                                           | 0 | 0                                   | 1 | 1                                        | 2 | 2                           | 3 | 3    |   |         |   |     |
| 0   | 0                                                                   |                                                                                    |                                                                                                                                                                                                                                                                                                                                        |   |                                     |   |                                          |   |                             |   |      |   |         |   |     |
| 1   | 1                                                                   |                                                                                    |                                                                                                                                                                                                                                                                                                                                        |   |                                     |   |                                          |   |                             |   |      |   |         |   |     |
| 2   | 2                                                                   |                                                                                    |                                                                                                                                                                                                                                                                                                                                        |   |                                     |   |                                          |   |                             |   |      |   |         |   |     |
| 3   | 3                                                                   |                                                                                    |                                                                                                                                                                                                                                                                                                                                        |   |                                     |   |                                          |   |                             |   |      |   |         |   |     |

|     |                                                                                   |                                                                              |                                                                                                                                                                                                                                                                                                                                           |   |                          |   |                             |   |                             |   |      |   |           |   |         |   |     |
|-----|-----------------------------------------------------------------------------------|------------------------------------------------------------------------------|-------------------------------------------------------------------------------------------------------------------------------------------------------------------------------------------------------------------------------------------------------------------------------------------------------------------------------------------|---|--------------------------|---|-----------------------------|---|-----------------------------|---|------|---|-----------|---|---------|---|-----|
| 122 | [ keto_late_age ]<br>Show the field ONLY if:<br>[keto_late] = '1'                 | Age at keto initiation (months)?<br><i>integer</i>                           | text (integer)                                                                                                                                                                                                                                                                                                                            |   |                          |   |                             |   |                             |   |      |   |           |   |         |   |     |
| 123 | [ keto_late_ratio ]<br>Show the field ONLY if:<br>[keto_late] = '1'               | Maintenance ratio:<br><i>e.g. 3:1</i>                                        | text                                                                                                                                                                                                                                                                                                                                      |   |                          |   |                             |   |                             |   |      |   |           |   |         |   |     |
| 124 | [ keto_late_clin ]<br>Show the field ONLY if:<br>[keto_late] = '1'                | 1-month response after ketogenic diet initiation, clinical observation only? | radio<br><table border="1"> <tr><td>1</td><td>Full response</td></tr> <tr><td>2</td><td>Late response after 1 month</td></tr> <tr><td>3</td><td>Partial [CDKL5 cohort only]</td></tr> <tr><td>4</td><td>None</td></tr> <tr><td>5</td><td>Worsening</td></tr> <tr><td>6</td><td>Unknown</td></tr> <tr><td>9</td><td>N/A</td></tr> </table> | 1 | Full response            | 2 | Late response after 1 month | 3 | Partial [CDKL5 cohort only] | 4 | None | 5 | Worsening | 6 | Unknown | 9 | N/A |
| 1   | Full response                                                                     |                                                                              |                                                                                                                                                                                                                                                                                                                                           |   |                          |   |                             |   |                             |   |      |   |           |   |         |   |     |
| 2   | Late response after 1 month                                                       |                                                                              |                                                                                                                                                                                                                                                                                                                                           |   |                          |   |                             |   |                             |   |      |   |           |   |         |   |     |
| 3   | Partial [CDKL5 cohort only]                                                       |                                                                              |                                                                                                                                                                                                                                                                                                                                           |   |                          |   |                             |   |                             |   |      |   |           |   |         |   |     |
| 4   | None                                                                              |                                                                              |                                                                                                                                                                                                                                                                                                                                           |   |                          |   |                             |   |                             |   |      |   |           |   |         |   |     |
| 5   | Worsening                                                                         |                                                                              |                                                                                                                                                                                                                                                                                                                                           |   |                          |   |                             |   |                             |   |      |   |           |   |         |   |     |
| 6   | Unknown                                                                           |                                                                              |                                                                                                                                                                                                                                                                                                                                           |   |                          |   |                             |   |                             |   |      |   |           |   |         |   |     |
| 9   | N/A                                                                               |                                                                              |                                                                                                                                                                                                                                                                                                                                           |   |                          |   |                             |   |                             |   |      |   |           |   |         |   |     |
| 125 | [ keto_late_clin_partial ]<br>Show the field ONLY if:<br>[keto_late_clin] = '3'   | If partial response, please clarify:                                         | radio<br><table border="1"> <tr><td>1</td><td>&gt;50% reduction in spasms</td></tr> <tr><td>2</td><td>&lt; 50% reduction in spasms</td></tr> <tr><td>9</td><td>Unknown</td></tr> </table>                                                                                                                                                 | 1 | >50% reduction in spasms | 2 | < 50% reduction in spasms   | 9 | Unknown                     |   |      |   |           |   |         |   |     |
| 1   | >50% reduction in spasms                                                          |                                                                              |                                                                                                                                                                                                                                                                                                                                           |   |                          |   |                             |   |                             |   |      |   |           |   |         |   |     |
| 2   | < 50% reduction in spasms                                                         |                                                                              |                                                                                                                                                                                                                                                                                                                                           |   |                          |   |                             |   |                             |   |      |   |           |   |         |   |     |
| 9   | Unknown                                                                           |                                                                              |                                                                                                                                                                                                                                                                                                                                           |   |                          |   |                             |   |                             |   |      |   |           |   |         |   |     |
| 126 | [ keto_late_clin_partial_2 ]<br>Show the field ONLY if:<br>[keto_late_clin] = '3' | If partial response, please add any relevant notes:                          | notes                                                                                                                                                                                                                                                                                                                                     |   |                          |   |                             |   |                             |   |      |   |           |   |         |   |     |

|     |                                                                                                 |                                                                                          |                                                                                                                                                                                                                                                                                                                                                |   |                                             |   |                                          |   |                             |   |      |   |           |   |         |   |     |
|-----|-------------------------------------------------------------------------------------------------|------------------------------------------------------------------------------------------|------------------------------------------------------------------------------------------------------------------------------------------------------------------------------------------------------------------------------------------------------------------------------------------------------------------------------------------------|---|---------------------------------------------|---|------------------------------------------|---|-----------------------------|---|------|---|-----------|---|---------|---|-----|
| 127 | [ <a href="#">keto_late_eeg</a> ]<br>Show the field ONLY if:<br>[keto_late] = '1'               | 1-month response after ketogenic diet initiation, with follow-up EEG?                    | radio<br><table border="1"> <tr><td>1</td><td>Full response</td></tr> <tr><td>2</td><td>Late response after 1 month</td></tr> <tr><td>3</td><td>Partial [CDKL5 cohort only]</td></tr> <tr><td>4</td><td>None</td></tr> <tr><td>5</td><td>Worsening</td></tr> <tr><td>6</td><td>Unknown</td></tr> <tr><td>9</td><td>N/A</td></tr> </table>      | 1 | Full response                               | 2 | Late response after 1 month              | 3 | Partial [CDKL5 cohort only] | 4 | None | 5 | Worsening | 6 | Unknown | 9 | N/A |
| 1   | Full response                                                                                   |                                                                                          |                                                                                                                                                                                                                                                                                                                                                |   |                                             |   |                                          |   |                             |   |      |   |           |   |         |   |     |
| 2   | Late response after 1 month                                                                     |                                                                                          |                                                                                                                                                                                                                                                                                                                                                |   |                                             |   |                                          |   |                             |   |      |   |           |   |         |   |     |
| 3   | Partial [CDKL5 cohort only]                                                                     |                                                                                          |                                                                                                                                                                                                                                                                                                                                                |   |                                             |   |                                          |   |                             |   |      |   |           |   |         |   |     |
| 4   | None                                                                                            |                                                                                          |                                                                                                                                                                                                                                                                                                                                                |   |                                             |   |                                          |   |                             |   |      |   |           |   |         |   |     |
| 5   | Worsening                                                                                       |                                                                                          |                                                                                                                                                                                                                                                                                                                                                |   |                                             |   |                                          |   |                             |   |      |   |           |   |         |   |     |
| 6   | Unknown                                                                                         |                                                                                          |                                                                                                                                                                                                                                                                                                                                                |   |                                             |   |                                          |   |                             |   |      |   |           |   |         |   |     |
| 9   | N/A                                                                                             |                                                                                          |                                                                                                                                                                                                                                                                                                                                                |   |                                             |   |                                          |   |                             |   |      |   |           |   |         |   |     |
| 128 | [ <a href="#">keto_late_eeg_partial</a> ]<br>Show the field ONLY if:<br>[keto_late_eeg] = '3'   | If partial response, please clarify:                                                     | radio<br><table border="1"> <tr><td>1</td><td>&gt;50% reduction in spasms</td></tr> <tr><td>2</td><td>&lt; 50% reduction in spasms</td></tr> <tr><td>9</td><td>Unknown</td></tr> </table>                                                                                                                                                      | 1 | >50% reduction in spasms                    | 2 | < 50% reduction in spasms                | 9 | Unknown                     |   |      |   |           |   |         |   |     |
| 1   | >50% reduction in spasms                                                                        |                                                                                          |                                                                                                                                                                                                                                                                                                                                                |   |                                             |   |                                          |   |                             |   |      |   |           |   |         |   |     |
| 2   | < 50% reduction in spasms                                                                       |                                                                                          |                                                                                                                                                                                                                                                                                                                                                |   |                                             |   |                                          |   |                             |   |      |   |           |   |         |   |     |
| 9   | Unknown                                                                                         |                                                                                          |                                                                                                                                                                                                                                                                                                                                                |   |                                             |   |                                          |   |                             |   |      |   |           |   |         |   |     |
| 129 | [ <a href="#">keto_late_eeg_partial_2</a> ]<br>Show the field ONLY if:<br>[keto_late_eeg] = '3' | If partial response, please add any relevant notes:                                      | notes                                                                                                                                                                                                                                                                                                                                          |   |                                             |   |                                          |   |                             |   |      |   |           |   |         |   |     |
| 130 | [ <a href="#">keto_late_3m</a> ]<br>Show the field ONLY if:<br>[keto_late] = '1'                | Response at 3 months to ketogenic diet, clinical observation?<br><i>EEG not required</i> | radio<br><table border="1"> <tr><td>1</td><td>Full 1-month response sustained at 3 months</td></tr> <tr><td>2</td><td>Full late response sustained at 3 months</td></tr> <tr><td>3</td><td>Partial [CDKL5 cohort only]</td></tr> <tr><td>4</td><td>None</td></tr> <tr><td>6</td><td>Unknown</td></tr> <tr><td>9</td><td>N/A</td></tr> </table> | 1 | Full 1-month response sustained at 3 months | 2 | Full late response sustained at 3 months | 3 | Partial [CDKL5 cohort only] | 4 | None | 6 | Unknown   | 9 | N/A     |   |     |
| 1   | Full 1-month response sustained at 3 months                                                     |                                                                                          |                                                                                                                                                                                                                                                                                                                                                |   |                                             |   |                                          |   |                             |   |      |   |           |   |         |   |     |
| 2   | Full late response sustained at 3 months                                                        |                                                                                          |                                                                                                                                                                                                                                                                                                                                                |   |                                             |   |                                          |   |                             |   |      |   |           |   |         |   |     |
| 3   | Partial [CDKL5 cohort only]                                                                     |                                                                                          |                                                                                                                                                                                                                                                                                                                                                |   |                                             |   |                                          |   |                             |   |      |   |           |   |         |   |     |
| 4   | None                                                                                            |                                                                                          |                                                                                                                                                                                                                                                                                                                                                |   |                                             |   |                                          |   |                             |   |      |   |           |   |         |   |     |
| 6   | Unknown                                                                                         |                                                                                          |                                                                                                                                                                                                                                                                                                                                                |   |                                             |   |                                          |   |                             |   |      |   |           |   |         |   |     |
| 9   | N/A                                                                                             |                                                                                          |                                                                                                                                                                                                                                                                                                                                                |   |                                             |   |                                          |   |                             |   |      |   |           |   |         |   |     |
| 131 | [ <a href="#">keto_late_3m_partial</a> ]<br>Show the field ONLY if:<br>[keto_late_3m] = '3'     | If partial response, please clarify:                                                     | radio<br><table border="1"> <tr><td>1</td><td>&gt;50% reduction in spasms</td></tr> <tr><td>2</td><td>&lt; 50% reduction in spasms</td></tr> <tr><td>3</td><td>Unknown</td></tr> </table>                                                                                                                                                      | 1 | >50% reduction in spasms                    | 2 | < 50% reduction in spasms                | 3 | Unknown                     |   |      |   |           |   |         |   |     |
| 1   | >50% reduction in spasms                                                                        |                                                                                          |                                                                                                                                                                                                                                                                                                                                                |   |                                             |   |                                          |   |                             |   |      |   |           |   |         |   |     |
| 2   | < 50% reduction in spasms                                                                       |                                                                                          |                                                                                                                                                                                                                                                                                                                                                |   |                                             |   |                                          |   |                             |   |      |   |           |   |         |   |     |
| 3   | Unknown                                                                                         |                                                                                          |                                                                                                                                                                                                                                                                                                                                                |   |                                             |   |                                          |   |                             |   |      |   |           |   |         |   |     |



|     |                                                                                               |                                                                                                |                                                                                                                                                                                                                                                                                                                                        |   |                                     |   |                                          |   |                             |   |                                            |   |         |   |     |
|-----|-----------------------------------------------------------------------------------------------|------------------------------------------------------------------------------------------------|----------------------------------------------------------------------------------------------------------------------------------------------------------------------------------------------------------------------------------------------------------------------------------------------------------------------------------------|---|-------------------------------------|---|------------------------------------------|---|-----------------------------|---|--------------------------------------------|---|---------|---|-----|
| 132 | [ <a href="#">keto_late_3m_partial_2</a> ]<br>Show the field ONLY if:<br>[keto_late_3m] = '3' | If partial response, please add any relevant notes:                                            | notes                                                                                                                                                                                                                                                                                                                                  |   |                                     |   |                                          |   |                             |   |                                            |   |         |   |     |
| 133 | [ <a href="#">keto_late_6m</a> ]<br>Show the field ONLY if:<br>[keto_late] = '1'              | Spasm control at 6 months (clinical observation)?                                              | radio<br><table border="1"> <tr><td>1</td><td>Full response sustained at 6 months</td></tr> <tr><td>2</td><td>Full late response sustained at 6 months</td></tr> <tr><td>3</td><td>Partial [CDKL5 cohort only]</td></tr> <tr><td>4</td><td>None</td></tr> <tr><td>6</td><td>Unknown</td></tr> <tr><td>9</td><td>N/A</td></tr> </table> | 1 | Full response sustained at 6 months | 2 | Full late response sustained at 6 months | 3 | Partial [CDKL5 cohort only] | 4 | None                                       | 6 | Unknown | 9 | N/A |
| 1   | Full response sustained at 6 months                                                           |                                                                                                |                                                                                                                                                                                                                                                                                                                                        |   |                                     |   |                                          |   |                             |   |                                            |   |         |   |     |
| 2   | Full late response sustained at 6 months                                                      |                                                                                                |                                                                                                                                                                                                                                                                                                                                        |   |                                     |   |                                          |   |                             |   |                                            |   |         |   |     |
| 3   | Partial [CDKL5 cohort only]                                                                   |                                                                                                |                                                                                                                                                                                                                                                                                                                                        |   |                                     |   |                                          |   |                             |   |                                            |   |         |   |     |
| 4   | None                                                                                          |                                                                                                |                                                                                                                                                                                                                                                                                                                                        |   |                                     |   |                                          |   |                             |   |                                            |   |         |   |     |
| 6   | Unknown                                                                                       |                                                                                                |                                                                                                                                                                                                                                                                                                                                        |   |                                     |   |                                          |   |                             |   |                                            |   |         |   |     |
| 9   | N/A                                                                                           |                                                                                                |                                                                                                                                                                                                                                                                                                                                        |   |                                     |   |                                          |   |                             |   |                                            |   |         |   |     |
| 134 | [ <a href="#">keto_late_6m_partial</a> ]<br>Show the field ONLY if:<br>[keto_late_6m] = '3'   | If partial response, please clarify:                                                           | radio<br><table border="1"> <tr><td>1</td><td>&gt;50% reduction in spasms</td></tr> <tr><td>2</td><td>&lt; 50% reduction in spasms</td></tr> <tr><td>3</td><td>Unknown</td></tr> </table>                                                                                                                                              | 1 | >50% reduction in spasms            | 2 | < 50% reduction in spasms                | 3 | Unknown                     |   |                                            |   |         |   |     |
| 1   | >50% reduction in spasms                                                                      |                                                                                                |                                                                                                                                                                                                                                                                                                                                        |   |                                     |   |                                          |   |                             |   |                                            |   |         |   |     |
| 2   | < 50% reduction in spasms                                                                     |                                                                                                |                                                                                                                                                                                                                                                                                                                                        |   |                                     |   |                                          |   |                             |   |                                            |   |         |   |     |
| 3   | Unknown                                                                                       |                                                                                                |                                                                                                                                                                                                                                                                                                                                        |   |                                     |   |                                          |   |                             |   |                                            |   |         |   |     |
| 135 | [ <a href="#">keto_late_6m_partial_2</a> ]<br>Show the field ONLY if:<br>[keto_late_6m] = '3' | If partial response, please add any relevant notes:                                            | notes                                                                                                                                                                                                                                                                                                                                  |   |                                     |   |                                          |   |                             |   |                                            |   |         |   |     |
| 136 | [ <a href="#">post1</a> ]                                                                     | Section Header: <i>Post-treatment EEG information</i><br>Initial 1st line treatment of spasms? | radio<br><table border="1"> <tr><td>1</td><td>ACTH</td></tr> <tr><td>2</td><td>Prednisolone</td></tr> <tr><td>3</td><td>Vigabatrin</td></tr> <tr><td>4</td><td>Combination vigabatrin + ACTH/prednisolone</td></tr> <tr><td>5</td><td>Other</td></tr> </table>                                                                         | 1 | ACTH                                | 2 | Prednisolone                             | 3 | Vigabatrin                  | 4 | Combination vigabatrin + ACTH/prednisolone | 5 | Other   |   |     |
| 1   | ACTH                                                                                          |                                                                                                |                                                                                                                                                                                                                                                                                                                                        |   |                                     |   |                                          |   |                             |   |                                            |   |         |   |     |
| 2   | Prednisolone                                                                                  |                                                                                                |                                                                                                                                                                                                                                                                                                                                        |   |                                     |   |                                          |   |                             |   |                                            |   |         |   |     |
| 3   | Vigabatrin                                                                                    |                                                                                                |                                                                                                                                                                                                                                                                                                                                        |   |                                     |   |                                          |   |                             |   |                                            |   |         |   |     |
| 4   | Combination vigabatrin + ACTH/prednisolone                                                    |                                                                                                |                                                                                                                                                                                                                                                                                                                                        |   |                                     |   |                                          |   |                             |   |                                            |   |         |   |     |
| 5   | Other                                                                                         |                                                                                                |                                                                                                                                                                                                                                                                                                                                        |   |                                     |   |                                          |   |                             |   |                                            |   |         |   |     |
| 137 | [ <a href="#">post1_other</a> ]<br>Show the field ONLY if:<br>[post1] = '5'                   | If other, please explain:                                                                      | text                                                                                                                                                                                                                                                                                                                                   |   |                                     |   |                                          |   |                             |   |                                            |   |         |   |     |

|     |                                                                                       |                                                                                                                                                             |                                                                                                                                                                                                                                                                                                                                                                                                                                                                                                                      |   |                  |                   |    |                  |                         |   |                  |               |   |                  |                               |   |                  |                        |   |                  |                         |
|-----|---------------------------------------------------------------------------------------|-------------------------------------------------------------------------------------------------------------------------------------------------------------|----------------------------------------------------------------------------------------------------------------------------------------------------------------------------------------------------------------------------------------------------------------------------------------------------------------------------------------------------------------------------------------------------------------------------------------------------------------------------------------------------------------------|---|------------------|-------------------|----|------------------|-------------------------|---|------------------|---------------|---|------------------|-------------------------------|---|------------------|------------------------|---|------------------|-------------------------|
| 138 | [ <a href="#">post1_av</a> ]                                                          | Was there a post-treatment EEG after initial 1st line treatment of spasms (ACTH or prednisolone, or max dose of vigabatrin)?<br><i>Maximum 6 weeks post</i> | radio<br><table border="1"> <tr> <td>1</td> <td>Yes</td> </tr> <tr> <td>2</td> <td>No</td> </tr> <tr> <td>9</td> <td>Unknown</td> </tr> </table>                                                                                                                                                                                                                                                                                                                                                                     | 1 | Yes              | 2                 | No | 9                | Unknown                 |   |                  |               |   |                  |                               |   |                  |                        |   |                  |                         |
| 1   | Yes                                                                                   |                                                                                                                                                             |                                                                                                                                                                                                                                                                                                                                                                                                                                                                                                                      |   |                  |                   |    |                  |                         |   |                  |               |   |                  |                               |   |                  |                        |   |                  |                         |
| 2   | No                                                                                    |                                                                                                                                                             |                                                                                                                                                                                                                                                                                                                                                                                                                                                                                                                      |   |                  |                   |    |                  |                         |   |                  |               |   |                  |                               |   |                  |                        |   |                  |                         |
| 9   | Unknown                                                                               |                                                                                                                                                             |                                                                                                                                                                                                                                                                                                                                                                                                                                                                                                                      |   |                  |                   |    |                  |                         |   |                  |               |   |                  |                               |   |                  |                        |   |                  |                         |
| 139 | [ <a href="#">post1_ef</a> ]<br>Show the field ONLY if:<br>[post1_av] = '1'           | EEG features:<br><i>select all that apply</i>                                                                                                               | checkbox<br><table border="1"> <tr> <td>2</td> <td>post1_ef__2</td> <td>Hypsarrhythmia</td> </tr> <tr> <td>3</td> <td>post1_ef__3</td> <td>Modified hypsarrhythmia</td> </tr> <tr> <td>4</td> <td>post1_ef__4</td> <td>Other</td> </tr> <tr> <td>5</td> <td>post1_ef__5</td> <td>Normal</td> </tr> <tr> <td>6</td> <td>post1_ef__6</td> <td>Any Abnormality (NISC)</td> </tr> </table>                                                                                                                               | 2 | post1_ef__2      | Hypsarrhythmia    | 3  | post1_ef__3      | Modified hypsarrhythmia | 4 | post1_ef__4      | Other         | 5 | post1_ef__5      | Normal                        | 6 | post1_ef__6      | Any Abnormality (NISC) |   |                  |                         |
| 2   | post1_ef__2                                                                           | Hypsarrhythmia                                                                                                                                              |                                                                                                                                                                                                                                                                                                                                                                                                                                                                                                                      |   |                  |                   |    |                  |                         |   |                  |               |   |                  |                               |   |                  |                        |   |                  |                         |
| 3   | post1_ef__3                                                                           | Modified hypsarrhythmia                                                                                                                                     |                                                                                                                                                                                                                                                                                                                                                                                                                                                                                                                      |   |                  |                   |    |                  |                         |   |                  |               |   |                  |                               |   |                  |                        |   |                  |                         |
| 4   | post1_ef__4                                                                           | Other                                                                                                                                                       |                                                                                                                                                                                                                                                                                                                                                                                                                                                                                                                      |   |                  |                   |    |                  |                         |   |                  |               |   |                  |                               |   |                  |                        |   |                  |                         |
| 5   | post1_ef__5                                                                           | Normal                                                                                                                                                      |                                                                                                                                                                                                                                                                                                                                                                                                                                                                                                                      |   |                  |                   |    |                  |                         |   |                  |               |   |                  |                               |   |                  |                        |   |                  |                         |
| 6   | post1_ef__6                                                                           | Any Abnormality (NISC)                                                                                                                                      |                                                                                                                                                                                                                                                                                                                                                                                                                                                                                                                      |   |                  |                   |    |                  |                         |   |                  |               |   |                  |                               |   |                  |                        |   |                  |                         |
| 140 | [ <a href="#">post1_efother</a> ]<br>Show the field ONLY if:<br>[post1_ef(4)] = '1'   | If other, check all that apply:                                                                                                                             | checkbox<br><table border="1"> <tr> <td>1</td> <td>post1_efother__1</td> <td>Burst suppression</td> </tr> <tr> <td>2</td> <td>post1_efother__2</td> <td>Generalized slowing</td> </tr> <tr> <td>3</td> <td>post1_efother__3</td> <td>Focal slowing</td> </tr> <tr> <td>4</td> <td>post1_efother__4</td> <td>Normal PDR and sleep features</td> </tr> <tr> <td>5</td> <td>post1_efother__5</td> <td>Abnormal PDR</td> </tr> <tr> <td>6</td> <td>post1_efother__6</td> <td>Abnormal sleep features</td> </tr> </table> | 1 | post1_efother__1 | Burst suppression | 2  | post1_efother__2 | Generalized slowing     | 3 | post1_efother__3 | Focal slowing | 4 | post1_efother__4 | Normal PDR and sleep features | 5 | post1_efother__5 | Abnormal PDR           | 6 | post1_efother__6 | Abnormal sleep features |
| 1   | post1_efother__1                                                                      | Burst suppression                                                                                                                                           |                                                                                                                                                                                                                                                                                                                                                                                                                                                                                                                      |   |                  |                   |    |                  |                         |   |                  |               |   |                  |                               |   |                  |                        |   |                  |                         |
| 2   | post1_efother__2                                                                      | Generalized slowing                                                                                                                                         |                                                                                                                                                                                                                                                                                                                                                                                                                                                                                                                      |   |                  |                   |    |                  |                         |   |                  |               |   |                  |                               |   |                  |                        |   |                  |                         |
| 3   | post1_efother__3                                                                      | Focal slowing                                                                                                                                               |                                                                                                                                                                                                                                                                                                                                                                                                                                                                                                                      |   |                  |                   |    |                  |                         |   |                  |               |   |                  |                               |   |                  |                        |   |                  |                         |
| 4   | post1_efother__4                                                                      | Normal PDR and sleep features                                                                                                                               |                                                                                                                                                                                                                                                                                                                                                                                                                                                                                                                      |   |                  |                   |    |                  |                         |   |                  |               |   |                  |                               |   |                  |                        |   |                  |                         |
| 5   | post1_efother__5                                                                      | Abnormal PDR                                                                                                                                                |                                                                                                                                                                                                                                                                                                                                                                                                                                                                                                                      |   |                  |                   |    |                  |                         |   |                  |               |   |                  |                               |   |                  |                        |   |                  |                         |
| 6   | post1_efother__6                                                                      | Abnormal sleep features                                                                                                                                     |                                                                                                                                                                                                                                                                                                                                                                                                                                                                                                                      |   |                  |                   |    |                  |                         |   |                  |               |   |                  |                               |   |                  |                        |   |                  |                         |
| 141 | [ <a href="#">post1_efother_2</a> ]<br>Show the field ONLY if:<br>[post1_ef(4)] = '1' | If other, please add any relevant notes:                                                                                                                    | notes                                                                                                                                                                                                                                                                                                                                                                                                                                                                                                                |   |                  |                   |    |                  |                         |   |                  |               |   |                  |                               |   |                  |                        |   |                  |                         |

|     |                                                                                                                 |                                                                                                                                                                                                                                                                              |                                                                                                                                                                                                                                                                                                                                                                                                                                             |   |      |   |                                                                |   |              |   |               |   |             |   |             |   |                                   |   |               |
|-----|-----------------------------------------------------------------------------------------------------------------|------------------------------------------------------------------------------------------------------------------------------------------------------------------------------------------------------------------------------------------------------------------------------|---------------------------------------------------------------------------------------------------------------------------------------------------------------------------------------------------------------------------------------------------------------------------------------------------------------------------------------------------------------------------------------------------------------------------------------------|---|------|---|----------------------------------------------------------------|---|--------------|---|---------------|---|-------------|---|-------------|---|-----------------------------------|---|---------------|
| 142 | [ <a href="#">post1_efinterictal</a> ]<br>Show the field ONLY if:<br>[post1_ef(4)] = '1' or [post1_ef(6)] = '1' | Do any of the following interictal activities apply:                                                                                                                                                                                                                         | radio<br><table border="1"> <tr><td>0</td><td>None</td></tr> <tr><td>1</td><td>Multifocal (3 or more foci, independent from both hemispheres)</td></tr> <tr><td>3</td><td>Single focus</td></tr> <tr><td>4</td><td>Two foci only</td></tr> <tr><td>5</td><td>Hemispheric</td></tr> <tr><td>6</td><td>Generalized</td></tr> <tr><td>7</td><td>Generalized plus focal/multifocal</td></tr> <tr><td>9</td><td>Not available</td></tr> </table> | 0 | None | 1 | Multifocal (3 or more foci, independent from both hemispheres) | 3 | Single focus | 4 | Two foci only | 5 | Hemispheric | 6 | Generalized | 7 | Generalized plus focal/multifocal | 9 | Not available |
| 0   | None                                                                                                            |                                                                                                                                                                                                                                                                              |                                                                                                                                                                                                                                                                                                                                                                                                                                             |   |      |   |                                                                |   |              |   |               |   |             |   |             |   |                                   |   |               |
| 1   | Multifocal (3 or more foci, independent from both hemispheres)                                                  |                                                                                                                                                                                                                                                                              |                                                                                                                                                                                                                                                                                                                                                                                                                                             |   |      |   |                                                                |   |              |   |               |   |             |   |             |   |                                   |   |               |
| 3   | Single focus                                                                                                    |                                                                                                                                                                                                                                                                              |                                                                                                                                                                                                                                                                                                                                                                                                                                             |   |      |   |                                                                |   |              |   |               |   |             |   |             |   |                                   |   |               |
| 4   | Two foci only                                                                                                   |                                                                                                                                                                                                                                                                              |                                                                                                                                                                                                                                                                                                                                                                                                                                             |   |      |   |                                                                |   |              |   |               |   |             |   |             |   |                                   |   |               |
| 5   | Hemispheric                                                                                                     |                                                                                                                                                                                                                                                                              |                                                                                                                                                                                                                                                                                                                                                                                                                                             |   |      |   |                                                                |   |              |   |               |   |             |   |             |   |                                   |   |               |
| 6   | Generalized                                                                                                     |                                                                                                                                                                                                                                                                              |                                                                                                                                                                                                                                                                                                                                                                                                                                             |   |      |   |                                                                |   |              |   |               |   |             |   |             |   |                                   |   |               |
| 7   | Generalized plus focal/multifocal                                                                               |                                                                                                                                                                                                                                                                              |                                                                                                                                                                                                                                                                                                                                                                                                                                             |   |      |   |                                                                |   |              |   |               |   |             |   |             |   |                                   |   |               |
| 9   | Not available                                                                                                   |                                                                                                                                                                                                                                                                              |                                                                                                                                                                                                                                                                                                                                                                                                                                             |   |      |   |                                                                |   |              |   |               |   |             |   |             |   |                                   |   |               |
| 143 | [ <a href="#">post1_edata</a> ]<br>Show the field ONLY if:<br>[post1_av] = '1'                                  | Is the primary (raw) EEG data available for review?                                                                                                                                                                                                                          | radio<br><table border="1"> <tr><td>1</td><td>Yes</td></tr> <tr><td>2</td><td>No</td></tr> </table>                                                                                                                                                                                                                                                                                                                                         | 1 | Yes  | 2 | No                                                             |   |              |   |               |   |             |   |             |   |                                   |   |               |
| 1   | Yes                                                                                                             |                                                                                                                                                                                                                                                                              |                                                                                                                                                                                                                                                                                                                                                                                                                                             |   |      |   |                                                                |   |              |   |               |   |             |   |             |   |                                   |   |               |
| 2   | No                                                                                                              |                                                                                                                                                                                                                                                                              |                                                                                                                                                                                                                                                                                                                                                                                                                                             |   |      |   |                                                                |   |              |   |               |   |             |   |             |   |                                   |   |               |
| 144 | [ <a href="#">post1_base</a> ]<br>Show the field ONLY if:<br>[post1_edata] = '1'                                | If primary EEG data is available for review, please provide the BASED score for the EEG at spasms onset (prior to treatment). Review score as outlined below (BASED score description guide), based on the most severely abnormal 5 minute sleep epoch available from files: | radio<br><table border="1"> <tr><td>2</td><td>&lt;=2</td></tr> <tr><td>3</td><td>3</td></tr> <tr><td>4</td><td>4</td></tr> <tr><td>5</td><td>5</td></tr> <tr><td>9</td><td>N/A</td></tr> </table>                                                                                                                                                                                                                                           | 2 | <=2  | 3 | 3                                                              | 4 | 4            | 5 | 5             | 9 | N/A         |   |             |   |                                   |   |               |
| 2   | <=2                                                                                                             |                                                                                                                                                                                                                                                                              |                                                                                                                                                                                                                                                                                                                                                                                                                                             |   |      |   |                                                                |   |              |   |               |   |             |   |             |   |                                   |   |               |
| 3   | 3                                                                                                               |                                                                                                                                                                                                                                                                              |                                                                                                                                                                                                                                                                                                                                                                                                                                             |   |      |   |                                                                |   |              |   |               |   |             |   |             |   |                                   |   |               |
| 4   | 4                                                                                                               |                                                                                                                                                                                                                                                                              |                                                                                                                                                                                                                                                                                                                                                                                                                                             |   |      |   |                                                                |   |              |   |               |   |             |   |             |   |                                   |   |               |
| 5   | 5                                                                                                               |                                                                                                                                                                                                                                                                              |                                                                                                                                                                                                                                                                                                                                                                                                                                             |   |      |   |                                                                |   |              |   |               |   |             |   |             |   |                                   |   |               |
| 9   | N/A                                                                                                             |                                                                                                                                                                                                                                                                              |                                                                                                                                                                                                                                                                                                                                                                                                                                             |   |      |   |                                                                |   |              |   |               |   |             |   |             |   |                                   |   |               |
| 145 | [ <a href="#">post1_bc</a> ]<br>Show the field ONLY if:<br>[post1_edata] = '1'                                  | Specify how criteria are met, as outlined below (BASED score description guide):                                                                                                                                                                                             | text                                                                                                                                                                                                                                                                                                                                                                                                                                        |   |      |   |                                                                |   |              |   |               |   |             |   |             |   |                                   |   |               |
| 146 | [ <a href="#">basedscoreimage2</a> ]<br>Show the field ONLY if:<br>[post1_edata] = '1'                          | BASED score description guide:                                                                                                                                                                                                                                               | descriptive                                                                                                                                                                                                                                                                                                                                                                                                                                 |   |      |   |                                                                |   |              |   |               |   |             |   |             |   |                                   |   |               |

|     |                                                                                 |                                                                                                                                 |                                                                                                                                                                                                                                                                                                                                                                                                    |   |             |                |              |             |                         |   |                                            |       |       |             |        |   |             |                                    |
|-----|---------------------------------------------------------------------------------|---------------------------------------------------------------------------------------------------------------------------------|----------------------------------------------------------------------------------------------------------------------------------------------------------------------------------------------------------------------------------------------------------------------------------------------------------------------------------------------------------------------------------------------------|---|-------------|----------------|--------------|-------------|-------------------------|---|--------------------------------------------|-------|-------|-------------|--------|---|-------------|------------------------------------|
| 147 | [ <a href="#">post2</a> ]                                                       | Was there a 2nd (1st line) treatment for spasms?                                                                                | radio<br><table border="1"> <tr> <td>1</td> <td>Yes</td> </tr> <tr> <td>2</td> <td>No</td> </tr> <tr> <td>9</td> <td>Unknown</td> </tr> </table>                                                                                                                                                                                                                                                   | 1 | Yes         | 2              | No           | 9           | Unknown                 |   |                                            |       |       |             |        |   |             |                                    |
| 1   | Yes                                                                             |                                                                                                                                 |                                                                                                                                                                                                                                                                                                                                                                                                    |   |             |                |              |             |                         |   |                                            |       |       |             |        |   |             |                                    |
| 2   | No                                                                              |                                                                                                                                 |                                                                                                                                                                                                                                                                                                                                                                                                    |   |             |                |              |             |                         |   |                                            |       |       |             |        |   |             |                                    |
| 9   | Unknown                                                                         |                                                                                                                                 |                                                                                                                                                                                                                                                                                                                                                                                                    |   |             |                |              |             |                         |   |                                            |       |       |             |        |   |             |                                    |
| 148 | [ <a href="#">post2_med</a> ]<br>Show the field ONLY if:<br>[post2] = '1'       | Second (1st line) treatment for spasms?                                                                                         | radio<br><table border="1"> <tr> <td>1</td> <td>ACTH</td> </tr> <tr> <td>2</td> <td>Prednisolone</td> </tr> <tr> <td>3</td> <td>Vigabatrin</td> </tr> <tr> <td>4</td> <td>Combination vigabatrin + ACTH/prednisolone</td> </tr> <tr> <td>5</td> <td>Other</td> </tr> </table>                                                                                                                      | 1 | ACTH        | 2              | Prednisolone | 3           | Vigabatrin              | 4 | Combination vigabatrin + ACTH/prednisolone | 5     | Other |             |        |   |             |                                    |
| 1   | ACTH                                                                            |                                                                                                                                 |                                                                                                                                                                                                                                                                                                                                                                                                    |   |             |                |              |             |                         |   |                                            |       |       |             |        |   |             |                                    |
| 2   | Prednisolone                                                                    |                                                                                                                                 |                                                                                                                                                                                                                                                                                                                                                                                                    |   |             |                |              |             |                         |   |                                            |       |       |             |        |   |             |                                    |
| 3   | Vigabatrin                                                                      |                                                                                                                                 |                                                                                                                                                                                                                                                                                                                                                                                                    |   |             |                |              |             |                         |   |                                            |       |       |             |        |   |             |                                    |
| 4   | Combination vigabatrin + ACTH/prednisolone                                      |                                                                                                                                 |                                                                                                                                                                                                                                                                                                                                                                                                    |   |             |                |              |             |                         |   |                                            |       |       |             |        |   |             |                                    |
| 5   | Other                                                                           |                                                                                                                                 |                                                                                                                                                                                                                                                                                                                                                                                                    |   |             |                |              |             |                         |   |                                            |       |       |             |        |   |             |                                    |
| 149 | [ <a href="#">post2_other</a> ]<br>Show the field ONLY if:<br>[post2_med] = '5' | If other, please explain:                                                                                                       | text                                                                                                                                                                                                                                                                                                                                                                                               |   |             |                |              |             |                         |   |                                            |       |       |             |        |   |             |                                    |
| 150 | [ <a href="#">post2_e</a> ]<br>Show the field ONLY if:<br>[post2] = '1'         | Was there a post-treatment EEG (after starting ACTH or prednisolone, or max dose of vigabatrin)?<br><i>Maximum 6 weeks post</i> | radio<br><table border="1"> <tr> <td>1</td> <td>Yes</td> </tr> <tr> <td>2</td> <td>No</td> </tr> <tr> <td>9</td> <td>Unknown</td> </tr> </table>                                                                                                                                                                                                                                                   | 1 | Yes         | 2              | No           | 9           | Unknown                 |   |                                            |       |       |             |        |   |             |                                    |
| 1   | Yes                                                                             |                                                                                                                                 |                                                                                                                                                                                                                                                                                                                                                                                                    |   |             |                |              |             |                         |   |                                            |       |       |             |        |   |             |                                    |
| 2   | No                                                                              |                                                                                                                                 |                                                                                                                                                                                                                                                                                                                                                                                                    |   |             |                |              |             |                         |   |                                            |       |       |             |        |   |             |                                    |
| 9   | Unknown                                                                         |                                                                                                                                 |                                                                                                                                                                                                                                                                                                                                                                                                    |   |             |                |              |             |                         |   |                                            |       |       |             |        |   |             |                                    |
| 151 | [ <a href="#">post2_ef</a> ]<br>Show the field ONLY if:<br>[post2_e] = '1'      | EEG features:<br><i>select all that apply</i>                                                                                   | checkbox<br><table border="1"> <tr> <td>2</td> <td>post2_ef__2</td> <td>Hypsarrhythmia</td> </tr> <tr> <td>3</td> <td>post2_ef__3</td> <td>Modified hypsarrhythmia</td> </tr> <tr> <td>4</td> <td>post2_ef__4</td> <td>Other</td> </tr> <tr> <td>5</td> <td>post2_ef__5</td> <td>Normal</td> </tr> <tr> <td>6</td> <td>post2_ef__6</td> <td>Any abnormality [NISC cohort only]</td> </tr> </table> | 2 | post2_ef__2 | Hypsarrhythmia | 3            | post2_ef__3 | Modified hypsarrhythmia | 4 | post2_ef__4                                | Other | 5     | post2_ef__5 | Normal | 6 | post2_ef__6 | Any abnormality [NISC cohort only] |
| 2   | post2_ef__2                                                                     | Hypsarrhythmia                                                                                                                  |                                                                                                                                                                                                                                                                                                                                                                                                    |   |             |                |              |             |                         |   |                                            |       |       |             |        |   |             |                                    |
| 3   | post2_ef__3                                                                     | Modified hypsarrhythmia                                                                                                         |                                                                                                                                                                                                                                                                                                                                                                                                    |   |             |                |              |             |                         |   |                                            |       |       |             |        |   |             |                                    |
| 4   | post2_ef__4                                                                     | Other                                                                                                                           |                                                                                                                                                                                                                                                                                                                                                                                                    |   |             |                |              |             |                         |   |                                            |       |       |             |        |   |             |                                    |
| 5   | post2_ef__5                                                                     | Normal                                                                                                                          |                                                                                                                                                                                                                                                                                                                                                                                                    |   |             |                |              |             |                         |   |                                            |       |       |             |        |   |             |                                    |
| 6   | post2_ef__6                                                                     | Any abnormality [NISC cohort only]                                                                                              |                                                                                                                                                                                                                                                                                                                                                                                                    |   |             |                |              |             |                         |   |                                            |       |       |             |        |   |             |                                    |

|     |                                                                                                                             |                                                             |                                                                                                                                                                                                                                                                                                                                                                                                                                                                                                                          |   |                  |                   |                                                                |                  |                     |   |                  |               |             |                  |                               |   |                                   |              |               |                  |                         |
|-----|-----------------------------------------------------------------------------------------------------------------------------|-------------------------------------------------------------|--------------------------------------------------------------------------------------------------------------------------------------------------------------------------------------------------------------------------------------------------------------------------------------------------------------------------------------------------------------------------------------------------------------------------------------------------------------------------------------------------------------------------|---|------------------|-------------------|----------------------------------------------------------------|------------------|---------------------|---|------------------|---------------|-------------|------------------|-------------------------------|---|-----------------------------------|--------------|---------------|------------------|-------------------------|
| 152 | <p>[ <a href="#">post2_efother</a> ]</p> <p>Show the field ONLY if:<br/>[post2_ef(4)] = '1'</p>                             | <p>If other, please check all that apply:</p>               | <p>checkbox</p> <table border="1"> <tr> <td>1</td> <td>post2_efother__1</td> <td>Burst suppression</td> </tr> <tr> <td>2</td> <td>post2_efother__2</td> <td>Generalized slowing</td> </tr> <tr> <td>3</td> <td>post2_efother__3</td> <td>Focal slowing</td> </tr> <tr> <td>4</td> <td>post2_efother__4</td> <td>Normal PDR and sleep features</td> </tr> <tr> <td>5</td> <td>post2_efother__5</td> <td>Abnormal PDR</td> </tr> <tr> <td>6</td> <td>post2_efother__6</td> <td>Abnormal sleep features</td> </tr> </table> | 1 | post2_efother__1 | Burst suppression | 2                                                              | post2_efother__2 | Generalized slowing | 3 | post2_efother__3 | Focal slowing | 4           | post2_efother__4 | Normal PDR and sleep features | 5 | post2_efother__5                  | Abnormal PDR | 6             | post2_efother__6 | Abnormal sleep features |
| 1   | post2_efother__1                                                                                                            | Burst suppression                                           |                                                                                                                                                                                                                                                                                                                                                                                                                                                                                                                          |   |                  |                   |                                                                |                  |                     |   |                  |               |             |                  |                               |   |                                   |              |               |                  |                         |
| 2   | post2_efother__2                                                                                                            | Generalized slowing                                         |                                                                                                                                                                                                                                                                                                                                                                                                                                                                                                                          |   |                  |                   |                                                                |                  |                     |   |                  |               |             |                  |                               |   |                                   |              |               |                  |                         |
| 3   | post2_efother__3                                                                                                            | Focal slowing                                               |                                                                                                                                                                                                                                                                                                                                                                                                                                                                                                                          |   |                  |                   |                                                                |                  |                     |   |                  |               |             |                  |                               |   |                                   |              |               |                  |                         |
| 4   | post2_efother__4                                                                                                            | Normal PDR and sleep features                               |                                                                                                                                                                                                                                                                                                                                                                                                                                                                                                                          |   |                  |                   |                                                                |                  |                     |   |                  |               |             |                  |                               |   |                                   |              |               |                  |                         |
| 5   | post2_efother__5                                                                                                            | Abnormal PDR                                                |                                                                                                                                                                                                                                                                                                                                                                                                                                                                                                                          |   |                  |                   |                                                                |                  |                     |   |                  |               |             |                  |                               |   |                                   |              |               |                  |                         |
| 6   | post2_efother__6                                                                                                            | Abnormal sleep features                                     |                                                                                                                                                                                                                                                                                                                                                                                                                                                                                                                          |   |                  |                   |                                                                |                  |                     |   |                  |               |             |                  |                               |   |                                   |              |               |                  |                         |
| 153 | <p>[ <a href="#">post2_efother_2</a> ]</p> <p>Show the field ONLY if:<br/>[post2_ef(4)] = '1'</p>                           | <p>If other, please add any relevant notes:</p>             | <p>notes</p>                                                                                                                                                                                                                                                                                                                                                                                                                                                                                                             |   |                  |                   |                                                                |                  |                     |   |                  |               |             |                  |                               |   |                                   |              |               |                  |                         |
| 154 | <p>[ <a href="#">post2_efinterictal</a> ]</p> <p>Show the field ONLY if:<br/>[post2_ef(4)] = '1' or [post2_ef(6)] = '1'</p> | <p>Do any of the following interictal activities apply:</p> | <p>radio</p> <table border="1"> <tr> <td>0</td> <td>None</td> </tr> <tr> <td>1</td> <td>Multifocal (3 or more foci, independent from both hemispheres)</td> </tr> <tr> <td>3</td> <td>Single focus</td> </tr> <tr> <td>4</td> <td>Two foci only</td> </tr> <tr> <td>5</td> <td>Hemispheric</td> </tr> <tr> <td>6</td> <td>Generalized</td> </tr> <tr> <td>7</td> <td>Generalized plus focal/multifocal</td> </tr> <tr> <td>9</td> <td>Not available</td> </tr> </table>                                                  | 0 | None             | 1                 | Multifocal (3 or more foci, independent from both hemispheres) | 3                | Single focus        | 4 | Two foci only    | 5             | Hemispheric | 6                | Generalized                   | 7 | Generalized plus focal/multifocal | 9            | Not available |                  |                         |
| 0   | None                                                                                                                        |                                                             |                                                                                                                                                                                                                                                                                                                                                                                                                                                                                                                          |   |                  |                   |                                                                |                  |                     |   |                  |               |             |                  |                               |   |                                   |              |               |                  |                         |
| 1   | Multifocal (3 or more foci, independent from both hemispheres)                                                              |                                                             |                                                                                                                                                                                                                                                                                                                                                                                                                                                                                                                          |   |                  |                   |                                                                |                  |                     |   |                  |               |             |                  |                               |   |                                   |              |               |                  |                         |
| 3   | Single focus                                                                                                                |                                                             |                                                                                                                                                                                                                                                                                                                                                                                                                                                                                                                          |   |                  |                   |                                                                |                  |                     |   |                  |               |             |                  |                               |   |                                   |              |               |                  |                         |
| 4   | Two foci only                                                                                                               |                                                             |                                                                                                                                                                                                                                                                                                                                                                                                                                                                                                                          |   |                  |                   |                                                                |                  |                     |   |                  |               |             |                  |                               |   |                                   |              |               |                  |                         |
| 5   | Hemispheric                                                                                                                 |                                                             |                                                                                                                                                                                                                                                                                                                                                                                                                                                                                                                          |   |                  |                   |                                                                |                  |                     |   |                  |               |             |                  |                               |   |                                   |              |               |                  |                         |
| 6   | Generalized                                                                                                                 |                                                             |                                                                                                                                                                                                                                                                                                                                                                                                                                                                                                                          |   |                  |                   |                                                                |                  |                     |   |                  |               |             |                  |                               |   |                                   |              |               |                  |                         |
| 7   | Generalized plus focal/multifocal                                                                                           |                                                             |                                                                                                                                                                                                                                                                                                                                                                                                                                                                                                                          |   |                  |                   |                                                                |                  |                     |   |                  |               |             |                  |                               |   |                                   |              |               |                  |                         |
| 9   | Not available                                                                                                               |                                                             |                                                                                                                                                                                                                                                                                                                                                                                                                                                                                                                          |   |                  |                   |                                                                |                  |                     |   |                  |               |             |                  |                               |   |                                   |              |               |                  |                         |
| 155 | <p>[ <a href="#">post2_edata</a> ]</p> <p>Show the field ONLY if:<br/>[post2_e] = '1'</p>                                   | <p>Is the primary (raw) EEG data available for review?</p>  | <p>radio</p> <table border="1"> <tr> <td>1</td> <td>Yes</td> </tr> <tr> <td>2</td> <td>No</td> </tr> </table>                                                                                                                                                                                                                                                                                                                                                                                                            | 1 | Yes              | 2                 | No                                                             |                  |                     |   |                  |               |             |                  |                               |   |                                   |              |               |                  |                         |
| 1   | Yes                                                                                                                         |                                                             |                                                                                                                                                                                                                                                                                                                                                                                                                                                                                                                          |   |                  |                   |                                                                |                  |                     |   |                  |               |             |                  |                               |   |                                   |              |               |                  |                         |
| 2   | No                                                                                                                          |                                                             |                                                                                                                                                                                                                                                                                                                                                                                                                                                                                                                          |   |                  |                   |                                                                |                  |                     |   |                  |               |             |                  |                               |   |                                   |              |               |                  |                         |

|     |                                                                               |                                                                                                                                                                                                                                                                              |                                                                                                                                                                                                                                                                |   |      |   |              |   |            |   |                                            |   |       |
|-----|-------------------------------------------------------------------------------|------------------------------------------------------------------------------------------------------------------------------------------------------------------------------------------------------------------------------------------------------------------------------|----------------------------------------------------------------------------------------------------------------------------------------------------------------------------------------------------------------------------------------------------------------|---|------|---|--------------|---|------------|---|--------------------------------------------|---|-------|
| 156 | [ <b>post2_base</b> ]<br>Show the field ONLY if:<br>[post2_edata] = '1'       | If primary EEG data is available for review, please provide the BASED score for the EEG at spasms onset (prior to treatment). Review score as outlined below (BASED score description guide), based on the most severely abnormal 5 minute sleep epoch available from files: | radio<br><table border="1"> <tr><td>2</td><td>&lt;=2</td></tr> <tr><td>3</td><td>3</td></tr> <tr><td>4</td><td>4</td></tr> <tr><td>5</td><td>5</td></tr> <tr><td>9</td><td>N/A</td></tr> </table>                                                              | 2 | <=2  | 3 | 3            | 4 | 4          | 5 | 5                                          | 9 | N/A   |
| 2   | <=2                                                                           |                                                                                                                                                                                                                                                                              |                                                                                                                                                                                                                                                                |   |      |   |              |   |            |   |                                            |   |       |
| 3   | 3                                                                             |                                                                                                                                                                                                                                                                              |                                                                                                                                                                                                                                                                |   |      |   |              |   |            |   |                                            |   |       |
| 4   | 4                                                                             |                                                                                                                                                                                                                                                                              |                                                                                                                                                                                                                                                                |   |      |   |              |   |            |   |                                            |   |       |
| 5   | 5                                                                             |                                                                                                                                                                                                                                                                              |                                                                                                                                                                                                                                                                |   |      |   |              |   |            |   |                                            |   |       |
| 9   | N/A                                                                           |                                                                                                                                                                                                                                                                              |                                                                                                                                                                                                                                                                |   |      |   |              |   |            |   |                                            |   |       |
| 157 | [ <b>post2_bc</b> ]<br>Show the field ONLY if:<br>[post2_edata] = '1'         | Specify how criteria are met, as outlined below (BASED score description guide):                                                                                                                                                                                             | text                                                                                                                                                                                                                                                           |   |      |   |              |   |            |   |                                            |   |       |
| 158 | [ <b>basedscoreimage3</b> ]<br>Show the field ONLY if:<br>[post2_edata] = '1' | BASED score description guide:                                                                                                                                                                                                                                               | descriptive                                                                                                                                                                                                                                                    |   |      |   |              |   |            |   |                                            |   |       |
| 159 | [ <b>post3</b> ]                                                              | Was there a 3rd (1st line) treatment for spasms?                                                                                                                                                                                                                             | radio<br><table border="1"> <tr><td>1</td><td>Yes</td></tr> <tr><td>2</td><td>No</td></tr> <tr><td>9</td><td>Unknown</td></tr> </table>                                                                                                                        | 1 | Yes  | 2 | No           | 9 | Unknown    |   |                                            |   |       |
| 1   | Yes                                                                           |                                                                                                                                                                                                                                                                              |                                                                                                                                                                                                                                                                |   |      |   |              |   |            |   |                                            |   |       |
| 2   | No                                                                            |                                                                                                                                                                                                                                                                              |                                                                                                                                                                                                                                                                |   |      |   |              |   |            |   |                                            |   |       |
| 9   | Unknown                                                                       |                                                                                                                                                                                                                                                                              |                                                                                                                                                                                                                                                                |   |      |   |              |   |            |   |                                            |   |       |
| 160 | [ <b>post3_med</b> ]<br>Show the field ONLY if:<br>[post3] = '1'              | Third (1st line) treatment of spasms?                                                                                                                                                                                                                                        | radio<br><table border="1"> <tr><td>1</td><td>ACTH</td></tr> <tr><td>2</td><td>Prednisolone</td></tr> <tr><td>3</td><td>Vigabatrin</td></tr> <tr><td>4</td><td>Combination vigabatrin + ACTH/prednisolone</td></tr> <tr><td>5</td><td>Other</td></tr> </table> | 1 | ACTH | 2 | Prednisolone | 3 | Vigabatrin | 4 | Combination vigabatrin + ACTH/prednisolone | 5 | Other |
| 1   | ACTH                                                                          |                                                                                                                                                                                                                                                                              |                                                                                                                                                                                                                                                                |   |      |   |              |   |            |   |                                            |   |       |
| 2   | Prednisolone                                                                  |                                                                                                                                                                                                                                                                              |                                                                                                                                                                                                                                                                |   |      |   |              |   |            |   |                                            |   |       |
| 3   | Vigabatrin                                                                    |                                                                                                                                                                                                                                                                              |                                                                                                                                                                                                                                                                |   |      |   |              |   |            |   |                                            |   |       |
| 4   | Combination vigabatrin + ACTH/prednisolone                                    |                                                                                                                                                                                                                                                                              |                                                                                                                                                                                                                                                                |   |      |   |              |   |            |   |                                            |   |       |
| 5   | Other                                                                         |                                                                                                                                                                                                                                                                              |                                                                                                                                                                                                                                                                |   |      |   |              |   |            |   |                                            |   |       |
| 161 | [ <b>post3_other</b> ]<br>Show the field ONLY if:<br>[post3_med] = '5'        | If other, please explain:                                                                                                                                                                                                                                                    | text                                                                                                                                                                                                                                                           |   |      |   |              |   |            |   |                                            |   |       |

|     |                                                                                       |                                                                                                                                 |                                                                                                                                                                                                                                                                                                                                                                                                                                                                                                                      |   |                  |                   |    |                  |                         |   |                  |               |   |                  |                               |   |                  |                                    |   |                  |                         |
|-----|---------------------------------------------------------------------------------------|---------------------------------------------------------------------------------------------------------------------------------|----------------------------------------------------------------------------------------------------------------------------------------------------------------------------------------------------------------------------------------------------------------------------------------------------------------------------------------------------------------------------------------------------------------------------------------------------------------------------------------------------------------------|---|------------------|-------------------|----|------------------|-------------------------|---|------------------|---------------|---|------------------|-------------------------------|---|------------------|------------------------------------|---|------------------|-------------------------|
| 162 | [ <a href="#">post3_e</a> ]<br>Show the field ONLY if:<br>[post3] = '1'               | Was there a post-treatment EEG (after starting ACTH or prednisolone, or max dose of vigabatrin)?<br><i>Maximum 6 weeks post</i> | radio<br><table border="1"> <tr> <td>1</td> <td>Yes</td> </tr> <tr> <td>2</td> <td>No</td> </tr> <tr> <td>9</td> <td>Unknown</td> </tr> </table>                                                                                                                                                                                                                                                                                                                                                                     | 1 | Yes              | 2                 | No | 9                | Unknown                 |   |                  |               |   |                  |                               |   |                  |                                    |   |                  |                         |
| 1   | Yes                                                                                   |                                                                                                                                 |                                                                                                                                                                                                                                                                                                                                                                                                                                                                                                                      |   |                  |                   |    |                  |                         |   |                  |               |   |                  |                               |   |                  |                                    |   |                  |                         |
| 2   | No                                                                                    |                                                                                                                                 |                                                                                                                                                                                                                                                                                                                                                                                                                                                                                                                      |   |                  |                   |    |                  |                         |   |                  |               |   |                  |                               |   |                  |                                    |   |                  |                         |
| 9   | Unknown                                                                               |                                                                                                                                 |                                                                                                                                                                                                                                                                                                                                                                                                                                                                                                                      |   |                  |                   |    |                  |                         |   |                  |               |   |                  |                               |   |                  |                                    |   |                  |                         |
| 163 | [ <a href="#">post3_ef</a> ]<br>Show the field ONLY if:<br>[post3_e] = '1'            | EEG features:<br><i>select all that apply</i>                                                                                   | checkbox<br><table border="1"> <tr> <td>2</td> <td>post3_ef__2</td> <td>Hypsarrhythmia</td> </tr> <tr> <td>3</td> <td>post3_ef__3</td> <td>Modified hypsarrhythmia</td> </tr> <tr> <td>4</td> <td>post3_ef__4</td> <td>Other</td> </tr> <tr> <td>5</td> <td>post3_ef__5</td> <td>Normal</td> </tr> <tr> <td>6</td> <td>post3_ef__6</td> <td>Any abnormality [NISC cohort only]</td> </tr> </table>                                                                                                                   | 2 | post3_ef__2      | Hypsarrhythmia    | 3  | post3_ef__3      | Modified hypsarrhythmia | 4 | post3_ef__4      | Other         | 5 | post3_ef__5      | Normal                        | 6 | post3_ef__6      | Any abnormality [NISC cohort only] |   |                  |                         |
| 2   | post3_ef__2                                                                           | Hypsarrhythmia                                                                                                                  |                                                                                                                                                                                                                                                                                                                                                                                                                                                                                                                      |   |                  |                   |    |                  |                         |   |                  |               |   |                  |                               |   |                  |                                    |   |                  |                         |
| 3   | post3_ef__3                                                                           | Modified hypsarrhythmia                                                                                                         |                                                                                                                                                                                                                                                                                                                                                                                                                                                                                                                      |   |                  |                   |    |                  |                         |   |                  |               |   |                  |                               |   |                  |                                    |   |                  |                         |
| 4   | post3_ef__4                                                                           | Other                                                                                                                           |                                                                                                                                                                                                                                                                                                                                                                                                                                                                                                                      |   |                  |                   |    |                  |                         |   |                  |               |   |                  |                               |   |                  |                                    |   |                  |                         |
| 5   | post3_ef__5                                                                           | Normal                                                                                                                          |                                                                                                                                                                                                                                                                                                                                                                                                                                                                                                                      |   |                  |                   |    |                  |                         |   |                  |               |   |                  |                               |   |                  |                                    |   |                  |                         |
| 6   | post3_ef__6                                                                           | Any abnormality [NISC cohort only]                                                                                              |                                                                                                                                                                                                                                                                                                                                                                                                                                                                                                                      |   |                  |                   |    |                  |                         |   |                  |               |   |                  |                               |   |                  |                                    |   |                  |                         |
| 164 | [ <a href="#">post3_efother</a> ]<br>Show the field ONLY if:<br>[post3_ef(4)] = '1'   | If other, please check all that apply:                                                                                          | checkbox<br><table border="1"> <tr> <td>1</td> <td>post3_efother__1</td> <td>Burst suppression</td> </tr> <tr> <td>2</td> <td>post3_efother__2</td> <td>Generalized slowing</td> </tr> <tr> <td>3</td> <td>post3_efother__3</td> <td>Focal slowing</td> </tr> <tr> <td>4</td> <td>post3_efother__4</td> <td>Normal PDR and sleep features</td> </tr> <tr> <td>5</td> <td>post3_efother__5</td> <td>Abnormal PDR</td> </tr> <tr> <td>6</td> <td>post3_efother__6</td> <td>Abnormal sleep features</td> </tr> </table> | 1 | post3_efother__1 | Burst suppression | 2  | post3_efother__2 | Generalized slowing     | 3 | post3_efother__3 | Focal slowing | 4 | post3_efother__4 | Normal PDR and sleep features | 5 | post3_efother__5 | Abnormal PDR                       | 6 | post3_efother__6 | Abnormal sleep features |
| 1   | post3_efother__1                                                                      | Burst suppression                                                                                                               |                                                                                                                                                                                                                                                                                                                                                                                                                                                                                                                      |   |                  |                   |    |                  |                         |   |                  |               |   |                  |                               |   |                  |                                    |   |                  |                         |
| 2   | post3_efother__2                                                                      | Generalized slowing                                                                                                             |                                                                                                                                                                                                                                                                                                                                                                                                                                                                                                                      |   |                  |                   |    |                  |                         |   |                  |               |   |                  |                               |   |                  |                                    |   |                  |                         |
| 3   | post3_efother__3                                                                      | Focal slowing                                                                                                                   |                                                                                                                                                                                                                                                                                                                                                                                                                                                                                                                      |   |                  |                   |    |                  |                         |   |                  |               |   |                  |                               |   |                  |                                    |   |                  |                         |
| 4   | post3_efother__4                                                                      | Normal PDR and sleep features                                                                                                   |                                                                                                                                                                                                                                                                                                                                                                                                                                                                                                                      |   |                  |                   |    |                  |                         |   |                  |               |   |                  |                               |   |                  |                                    |   |                  |                         |
| 5   | post3_efother__5                                                                      | Abnormal PDR                                                                                                                    |                                                                                                                                                                                                                                                                                                                                                                                                                                                                                                                      |   |                  |                   |    |                  |                         |   |                  |               |   |                  |                               |   |                  |                                    |   |                  |                         |
| 6   | post3_efother__6                                                                      | Abnormal sleep features                                                                                                         |                                                                                                                                                                                                                                                                                                                                                                                                                                                                                                                      |   |                  |                   |    |                  |                         |   |                  |               |   |                  |                               |   |                  |                                    |   |                  |                         |
| 165 | [ <a href="#">post3_efother_2</a> ]<br>Show the field ONLY if:<br>[post3_ef(4)] = '1' | If other, please add any relevant notes:                                                                                        | notes                                                                                                                                                                                                                                                                                                                                                                                                                                                                                                                |   |                  |                   |    |                  |                         |   |                  |               |   |                  |                               |   |                  |                                    |   |                  |                         |

|     |                                                                                                                 |                                                                                                                                                                                                                                                                              |                                                                                                                                                                                                                                                                                                                                                                                                                                             |   |      |   |                                                                |   |              |   |               |   |             |   |             |   |                                   |   |               |
|-----|-----------------------------------------------------------------------------------------------------------------|------------------------------------------------------------------------------------------------------------------------------------------------------------------------------------------------------------------------------------------------------------------------------|---------------------------------------------------------------------------------------------------------------------------------------------------------------------------------------------------------------------------------------------------------------------------------------------------------------------------------------------------------------------------------------------------------------------------------------------|---|------|---|----------------------------------------------------------------|---|--------------|---|---------------|---|-------------|---|-------------|---|-----------------------------------|---|---------------|
| 166 | [ <a href="#">post3_efinterictal</a> ]<br>Show the field ONLY if:<br>[post3_ef(4)] = '1' or [post3_ef(6)] = '1' | Do any of the following interictal activities apply:                                                                                                                                                                                                                         | radio<br><table border="1"> <tr><td>0</td><td>None</td></tr> <tr><td>1</td><td>Multifocal (3 or more foci, independent from both hemispheres)</td></tr> <tr><td>3</td><td>Single focus</td></tr> <tr><td>4</td><td>Two foci only</td></tr> <tr><td>5</td><td>Hemispheric</td></tr> <tr><td>6</td><td>Generalized</td></tr> <tr><td>7</td><td>Generalized plus focal/multifocal</td></tr> <tr><td>9</td><td>Not available</td></tr> </table> | 0 | None | 1 | Multifocal (3 or more foci, independent from both hemispheres) | 3 | Single focus | 4 | Two foci only | 5 | Hemispheric | 6 | Generalized | 7 | Generalized plus focal/multifocal | 9 | Not available |
| 0   | None                                                                                                            |                                                                                                                                                                                                                                                                              |                                                                                                                                                                                                                                                                                                                                                                                                                                             |   |      |   |                                                                |   |              |   |               |   |             |   |             |   |                                   |   |               |
| 1   | Multifocal (3 or more foci, independent from both hemispheres)                                                  |                                                                                                                                                                                                                                                                              |                                                                                                                                                                                                                                                                                                                                                                                                                                             |   |      |   |                                                                |   |              |   |               |   |             |   |             |   |                                   |   |               |
| 3   | Single focus                                                                                                    |                                                                                                                                                                                                                                                                              |                                                                                                                                                                                                                                                                                                                                                                                                                                             |   |      |   |                                                                |   |              |   |               |   |             |   |             |   |                                   |   |               |
| 4   | Two foci only                                                                                                   |                                                                                                                                                                                                                                                                              |                                                                                                                                                                                                                                                                                                                                                                                                                                             |   |      |   |                                                                |   |              |   |               |   |             |   |             |   |                                   |   |               |
| 5   | Hemispheric                                                                                                     |                                                                                                                                                                                                                                                                              |                                                                                                                                                                                                                                                                                                                                                                                                                                             |   |      |   |                                                                |   |              |   |               |   |             |   |             |   |                                   |   |               |
| 6   | Generalized                                                                                                     |                                                                                                                                                                                                                                                                              |                                                                                                                                                                                                                                                                                                                                                                                                                                             |   |      |   |                                                                |   |              |   |               |   |             |   |             |   |                                   |   |               |
| 7   | Generalized plus focal/multifocal                                                                               |                                                                                                                                                                                                                                                                              |                                                                                                                                                                                                                                                                                                                                                                                                                                             |   |      |   |                                                                |   |              |   |               |   |             |   |             |   |                                   |   |               |
| 9   | Not available                                                                                                   |                                                                                                                                                                                                                                                                              |                                                                                                                                                                                                                                                                                                                                                                                                                                             |   |      |   |                                                                |   |              |   |               |   |             |   |             |   |                                   |   |               |
| 167 | [ <a href="#">post3_edata</a> ]<br>Show the field ONLY if:<br>[post3_e] = '1'                                   | Is the primary (raw) EEG data available for review?                                                                                                                                                                                                                          | radio<br><table border="1"> <tr><td>1</td><td>Yes</td></tr> <tr><td>2</td><td>No</td></tr> </table>                                                                                                                                                                                                                                                                                                                                         | 1 | Yes  | 2 | No                                                             |   |              |   |               |   |             |   |             |   |                                   |   |               |
| 1   | Yes                                                                                                             |                                                                                                                                                                                                                                                                              |                                                                                                                                                                                                                                                                                                                                                                                                                                             |   |      |   |                                                                |   |              |   |               |   |             |   |             |   |                                   |   |               |
| 2   | No                                                                                                              |                                                                                                                                                                                                                                                                              |                                                                                                                                                                                                                                                                                                                                                                                                                                             |   |      |   |                                                                |   |              |   |               |   |             |   |             |   |                                   |   |               |
| 168 | [ <a href="#">post3_base</a> ]<br>Show the field ONLY if:<br>[post3_edata] = '1'                                | If primary EEG data is available for review, please provide the BASED score for the EEG at spasms onset (prior to treatment). Review score as outlined below (BASED score description guide), based on the most severely abnormal 5 minute sleep epoch available from files: | radio<br><table border="1"> <tr><td>2</td><td>&lt;=2</td></tr> <tr><td>3</td><td>3</td></tr> <tr><td>4</td><td>4</td></tr> <tr><td>5</td><td>5</td></tr> <tr><td>9</td><td>N/A</td></tr> </table>                                                                                                                                                                                                                                           | 2 | <=2  | 3 | 3                                                              | 4 | 4            | 5 | 5             | 9 | N/A         |   |             |   |                                   |   |               |
| 2   | <=2                                                                                                             |                                                                                                                                                                                                                                                                              |                                                                                                                                                                                                                                                                                                                                                                                                                                             |   |      |   |                                                                |   |              |   |               |   |             |   |             |   |                                   |   |               |
| 3   | 3                                                                                                               |                                                                                                                                                                                                                                                                              |                                                                                                                                                                                                                                                                                                                                                                                                                                             |   |      |   |                                                                |   |              |   |               |   |             |   |             |   |                                   |   |               |
| 4   | 4                                                                                                               |                                                                                                                                                                                                                                                                              |                                                                                                                                                                                                                                                                                                                                                                                                                                             |   |      |   |                                                                |   |              |   |               |   |             |   |             |   |                                   |   |               |
| 5   | 5                                                                                                               |                                                                                                                                                                                                                                                                              |                                                                                                                                                                                                                                                                                                                                                                                                                                             |   |      |   |                                                                |   |              |   |               |   |             |   |             |   |                                   |   |               |
| 9   | N/A                                                                                                             |                                                                                                                                                                                                                                                                              |                                                                                                                                                                                                                                                                                                                                                                                                                                             |   |      |   |                                                                |   |              |   |               |   |             |   |             |   |                                   |   |               |
| 169 | [ <a href="#">post3_bc</a> ]<br>Show the field ONLY if:<br>[post3_edata] = '1'                                  | Specify how criteria are met, as outlined below (BASED score description guide):                                                                                                                                                                                             | text                                                                                                                                                                                                                                                                                                                                                                                                                                        |   |      |   |                                                                |   |              |   |               |   |             |   |             |   |                                   |   |               |
| 170 | [ <a href="#">basedscoreimage4</a> ]<br>Show the field ONLY if:<br>[post3_edata] = '1'                          | BASED score description guide:                                                                                                                                                                                                                                               | descriptive                                                                                                                                                                                                                                                                                                                                                                                                                                 |   |      |   |                                                                |   |              |   |               |   |             |   |             |   |                                   |   |               |
| 171 | [ <a href="#">postketo</a> ]                                                                                    | Were they on the ketogenic diet?                                                                                                                                                                                                                                             | radio<br><table border="1"> <tr><td>1</td><td>Yes</td></tr> <tr><td>2</td><td>No</td></tr> </table>                                                                                                                                                                                                                                                                                                                                         | 1 | Yes  | 2 | No                                                             |   |              |   |               |   |             |   |             |   |                                   |   |               |
| 1   | Yes                                                                                                             |                                                                                                                                                                                                                                                                              |                                                                                                                                                                                                                                                                                                                                                                                                                                             |   |      |   |                                                                |   |              |   |               |   |             |   |             |   |                                   |   |               |
| 2   | No                                                                                                              |                                                                                                                                                                                                                                                                              |                                                                                                                                                                                                                                                                                                                                                                                                                                             |   |      |   |                                                                |   |              |   |               |   |             |   |             |   |                                   |   |               |



|     |                                                                                             |                                                                                                                           |                                                                                                                                                                                                                                                                                                                                                                                                                                                                                                                                        |   |                     |                   |    |                     |                         |   |                     |               |   |                     |                               |   |                     |                                    |   |                     |                         |
|-----|---------------------------------------------------------------------------------------------|---------------------------------------------------------------------------------------------------------------------------|----------------------------------------------------------------------------------------------------------------------------------------------------------------------------------------------------------------------------------------------------------------------------------------------------------------------------------------------------------------------------------------------------------------------------------------------------------------------------------------------------------------------------------------|---|---------------------|-------------------|----|---------------------|-------------------------|---|---------------------|---------------|---|---------------------|-------------------------------|---|---------------------|------------------------------------|---|---------------------|-------------------------|
| 172 | [ <a href="#">postketo_e</a> ]<br>Show the field ONLY if:<br>[postketo] = '1'               | Was there an EEG after ketogenic diet (at ~1 month after starting diet) - this question also applies to late use of keto: | radio<br><table border="1"> <tr> <td>1</td> <td>Yes</td> </tr> <tr> <td>2</td> <td>No</td> </tr> <tr> <td>9</td> <td>Unknown</td> </tr> </table>                                                                                                                                                                                                                                                                                                                                                                                       | 1 | Yes                 | 2                 | No | 9                   | Unknown                 |   |                     |               |   |                     |                               |   |                     |                                    |   |                     |                         |
| 1   | Yes                                                                                         |                                                                                                                           |                                                                                                                                                                                                                                                                                                                                                                                                                                                                                                                                        |   |                     |                   |    |                     |                         |   |                     |               |   |                     |                               |   |                     |                                    |   |                     |                         |
| 2   | No                                                                                          |                                                                                                                           |                                                                                                                                                                                                                                                                                                                                                                                                                                                                                                                                        |   |                     |                   |    |                     |                         |   |                     |               |   |                     |                               |   |                     |                                    |   |                     |                         |
| 9   | Unknown                                                                                     |                                                                                                                           |                                                                                                                                                                                                                                                                                                                                                                                                                                                                                                                                        |   |                     |                   |    |                     |                         |   |                     |               |   |                     |                               |   |                     |                                    |   |                     |                         |
| 173 | [ <a href="#">postketo_ef</a> ]<br>Show the field ONLY if:<br>[postketo_e] = '1'            | EEG after ketogenic diet:<br><i>select all that apply</i>                                                                 | checkbox<br><table border="1"> <tr> <td>2</td> <td>postketo_ef__2</td> <td>Hypsarrhythmia</td> </tr> <tr> <td>3</td> <td>postketo_ef__3</td> <td>Modified hypsarrhythmia</td> </tr> <tr> <td>4</td> <td>postketo_ef__4</td> <td>Other</td> </tr> <tr> <td>5</td> <td>postketo_ef__5</td> <td>Normal</td> </tr> <tr> <td>6</td> <td>postketo_ef__6</td> <td>Any abnormality [NISC cohort only]</td> </tr> </table>                                                                                                                      | 2 | postketo_ef__2      | Hypsarrhythmia    | 3  | postketo_ef__3      | Modified hypsarrhythmia | 4 | postketo_ef__4      | Other         | 5 | postketo_ef__5      | Normal                        | 6 | postketo_ef__6      | Any abnormality [NISC cohort only] |   |                     |                         |
| 2   | postketo_ef__2                                                                              | Hypsarrhythmia                                                                                                            |                                                                                                                                                                                                                                                                                                                                                                                                                                                                                                                                        |   |                     |                   |    |                     |                         |   |                     |               |   |                     |                               |   |                     |                                    |   |                     |                         |
| 3   | postketo_ef__3                                                                              | Modified hypsarrhythmia                                                                                                   |                                                                                                                                                                                                                                                                                                                                                                                                                                                                                                                                        |   |                     |                   |    |                     |                         |   |                     |               |   |                     |                               |   |                     |                                    |   |                     |                         |
| 4   | postketo_ef__4                                                                              | Other                                                                                                                     |                                                                                                                                                                                                                                                                                                                                                                                                                                                                                                                                        |   |                     |                   |    |                     |                         |   |                     |               |   |                     |                               |   |                     |                                    |   |                     |                         |
| 5   | postketo_ef__5                                                                              | Normal                                                                                                                    |                                                                                                                                                                                                                                                                                                                                                                                                                                                                                                                                        |   |                     |                   |    |                     |                         |   |                     |               |   |                     |                               |   |                     |                                    |   |                     |                         |
| 6   | postketo_ef__6                                                                              | Any abnormality [NISC cohort only]                                                                                        |                                                                                                                                                                                                                                                                                                                                                                                                                                                                                                                                        |   |                     |                   |    |                     |                         |   |                     |               |   |                     |                               |   |                     |                                    |   |                     |                         |
| 174 | [ <a href="#">postketo_efother</a> ]<br>Show the field ONLY if:<br>[postketo_ef(4)] = '1'   | If other, please check all that apply:                                                                                    | checkbox<br><table border="1"> <tr> <td>1</td> <td>postketo_efother__1</td> <td>Burst suppression</td> </tr> <tr> <td>2</td> <td>postketo_efother__2</td> <td>Generalized slowing</td> </tr> <tr> <td>3</td> <td>postketo_efother__3</td> <td>Focal slowing</td> </tr> <tr> <td>4</td> <td>postketo_efother__4</td> <td>Normal PDR and sleep features</td> </tr> <tr> <td>5</td> <td>postketo_efother__5</td> <td>Abnormal PDR</td> </tr> <tr> <td>6</td> <td>postketo_efother__6</td> <td>Abnormal sleep features</td> </tr> </table> | 1 | postketo_efother__1 | Burst suppression | 2  | postketo_efother__2 | Generalized slowing     | 3 | postketo_efother__3 | Focal slowing | 4 | postketo_efother__4 | Normal PDR and sleep features | 5 | postketo_efother__5 | Abnormal PDR                       | 6 | postketo_efother__6 | Abnormal sleep features |
| 1   | postketo_efother__1                                                                         | Burst suppression                                                                                                         |                                                                                                                                                                                                                                                                                                                                                                                                                                                                                                                                        |   |                     |                   |    |                     |                         |   |                     |               |   |                     |                               |   |                     |                                    |   |                     |                         |
| 2   | postketo_efother__2                                                                         | Generalized slowing                                                                                                       |                                                                                                                                                                                                                                                                                                                                                                                                                                                                                                                                        |   |                     |                   |    |                     |                         |   |                     |               |   |                     |                               |   |                     |                                    |   |                     |                         |
| 3   | postketo_efother__3                                                                         | Focal slowing                                                                                                             |                                                                                                                                                                                                                                                                                                                                                                                                                                                                                                                                        |   |                     |                   |    |                     |                         |   |                     |               |   |                     |                               |   |                     |                                    |   |                     |                         |
| 4   | postketo_efother__4                                                                         | Normal PDR and sleep features                                                                                             |                                                                                                                                                                                                                                                                                                                                                                                                                                                                                                                                        |   |                     |                   |    |                     |                         |   |                     |               |   |                     |                               |   |                     |                                    |   |                     |                         |
| 5   | postketo_efother__5                                                                         | Abnormal PDR                                                                                                              |                                                                                                                                                                                                                                                                                                                                                                                                                                                                                                                                        |   |                     |                   |    |                     |                         |   |                     |               |   |                     |                               |   |                     |                                    |   |                     |                         |
| 6   | postketo_efother__6                                                                         | Abnormal sleep features                                                                                                   |                                                                                                                                                                                                                                                                                                                                                                                                                                                                                                                                        |   |                     |                   |    |                     |                         |   |                     |               |   |                     |                               |   |                     |                                    |   |                     |                         |
| 175 | [ <a href="#">postketo_efother_2</a> ]<br>Show the field ONLY if:<br>[postketo_ef(4)] = '1' | If other, please add any relevant notes:                                                                                  | notes                                                                                                                                                                                                                                                                                                                                                                                                                                                                                                                                  |   |                     |                   |    |                     |                         |   |                     |               |   |                     |                               |   |                     |                                    |   |                     |                         |

|     |                                                                                                                          |                                                                                                                                                                                                                                                                              |                                                                                                                                                                                                                                                                                                                                                                                                                                             |   |      |   |                                                                |   |              |   |               |   |             |   |             |   |                                   |   |               |
|-----|--------------------------------------------------------------------------------------------------------------------------|------------------------------------------------------------------------------------------------------------------------------------------------------------------------------------------------------------------------------------------------------------------------------|---------------------------------------------------------------------------------------------------------------------------------------------------------------------------------------------------------------------------------------------------------------------------------------------------------------------------------------------------------------------------------------------------------------------------------------------|---|------|---|----------------------------------------------------------------|---|--------------|---|---------------|---|-------------|---|-------------|---|-----------------------------------|---|---------------|
| 176 | [ <a href="#">postketo_efinterictal</a> ]<br>Show the field ONLY if:<br>[postketo_ef(4)] = '1' or [postketo_ef(6)] = '1' | Do any of the following interictal activities apply:                                                                                                                                                                                                                         | radio<br><table border="1"> <tr><td>0</td><td>None</td></tr> <tr><td>1</td><td>Multifocal (3 or more foci, independent from both hemispheres)</td></tr> <tr><td>3</td><td>Single focus</td></tr> <tr><td>4</td><td>Two foci only</td></tr> <tr><td>5</td><td>Hemispheric</td></tr> <tr><td>6</td><td>Generalized</td></tr> <tr><td>7</td><td>Generalized plus focal/multifocal</td></tr> <tr><td>9</td><td>Not available</td></tr> </table> | 0 | None | 1 | Multifocal (3 or more foci, independent from both hemispheres) | 3 | Single focus | 4 | Two foci only | 5 | Hemispheric | 6 | Generalized | 7 | Generalized plus focal/multifocal | 9 | Not available |
| 0   | None                                                                                                                     |                                                                                                                                                                                                                                                                              |                                                                                                                                                                                                                                                                                                                                                                                                                                             |   |      |   |                                                                |   |              |   |               |   |             |   |             |   |                                   |   |               |
| 1   | Multifocal (3 or more foci, independent from both hemispheres)                                                           |                                                                                                                                                                                                                                                                              |                                                                                                                                                                                                                                                                                                                                                                                                                                             |   |      |   |                                                                |   |              |   |               |   |             |   |             |   |                                   |   |               |
| 3   | Single focus                                                                                                             |                                                                                                                                                                                                                                                                              |                                                                                                                                                                                                                                                                                                                                                                                                                                             |   |      |   |                                                                |   |              |   |               |   |             |   |             |   |                                   |   |               |
| 4   | Two foci only                                                                                                            |                                                                                                                                                                                                                                                                              |                                                                                                                                                                                                                                                                                                                                                                                                                                             |   |      |   |                                                                |   |              |   |               |   |             |   |             |   |                                   |   |               |
| 5   | Hemispheric                                                                                                              |                                                                                                                                                                                                                                                                              |                                                                                                                                                                                                                                                                                                                                                                                                                                             |   |      |   |                                                                |   |              |   |               |   |             |   |             |   |                                   |   |               |
| 6   | Generalized                                                                                                              |                                                                                                                                                                                                                                                                              |                                                                                                                                                                                                                                                                                                                                                                                                                                             |   |      |   |                                                                |   |              |   |               |   |             |   |             |   |                                   |   |               |
| 7   | Generalized plus focal/multifocal                                                                                        |                                                                                                                                                                                                                                                                              |                                                                                                                                                                                                                                                                                                                                                                                                                                             |   |      |   |                                                                |   |              |   |               |   |             |   |             |   |                                   |   |               |
| 9   | Not available                                                                                                            |                                                                                                                                                                                                                                                                              |                                                                                                                                                                                                                                                                                                                                                                                                                                             |   |      |   |                                                                |   |              |   |               |   |             |   |             |   |                                   |   |               |
| 177 | [ <a href="#">postketo_edata</a> ]<br>Show the field ONLY if:<br>[postketo_e] = '1'                                      | Is the primary (raw) EEG data available for review?                                                                                                                                                                                                                          | radio<br><table border="1"> <tr><td>1</td><td>Yes</td></tr> <tr><td>2</td><td>No</td></tr> </table>                                                                                                                                                                                                                                                                                                                                         | 1 | Yes  | 2 | No                                                             |   |              |   |               |   |             |   |             |   |                                   |   |               |
| 1   | Yes                                                                                                                      |                                                                                                                                                                                                                                                                              |                                                                                                                                                                                                                                                                                                                                                                                                                                             |   |      |   |                                                                |   |              |   |               |   |             |   |             |   |                                   |   |               |
| 2   | No                                                                                                                       |                                                                                                                                                                                                                                                                              |                                                                                                                                                                                                                                                                                                                                                                                                                                             |   |      |   |                                                                |   |              |   |               |   |             |   |             |   |                                   |   |               |
| 178 | [ <a href="#">postketo_base</a> ]<br>Show the field ONLY if:<br>[postketo_edata] = '1'                                   | If primary EEG data is available for review, please provide the BASED score for the EEG at spasms onset (prior to treatment). Review score as outlined below (Based score description guide), based on the most severely abnormal 5 minute sleep epoch available from files: | radio<br><table border="1"> <tr><td>2</td><td>&lt;=2</td></tr> <tr><td>3</td><td>3</td></tr> <tr><td>4</td><td>4</td></tr> <tr><td>5</td><td>5</td></tr> <tr><td>9</td><td>N/A</td></tr> </table>                                                                                                                                                                                                                                           | 2 | <=2  | 3 | 3                                                              | 4 | 4            | 5 | 5             | 9 | N/A         |   |             |   |                                   |   |               |
| 2   | <=2                                                                                                                      |                                                                                                                                                                                                                                                                              |                                                                                                                                                                                                                                                                                                                                                                                                                                             |   |      |   |                                                                |   |              |   |               |   |             |   |             |   |                                   |   |               |
| 3   | 3                                                                                                                        |                                                                                                                                                                                                                                                                              |                                                                                                                                                                                                                                                                                                                                                                                                                                             |   |      |   |                                                                |   |              |   |               |   |             |   |             |   |                                   |   |               |
| 4   | 4                                                                                                                        |                                                                                                                                                                                                                                                                              |                                                                                                                                                                                                                                                                                                                                                                                                                                             |   |      |   |                                                                |   |              |   |               |   |             |   |             |   |                                   |   |               |
| 5   | 5                                                                                                                        |                                                                                                                                                                                                                                                                              |                                                                                                                                                                                                                                                                                                                                                                                                                                             |   |      |   |                                                                |   |              |   |               |   |             |   |             |   |                                   |   |               |
| 9   | N/A                                                                                                                      |                                                                                                                                                                                                                                                                              |                                                                                                                                                                                                                                                                                                                                                                                                                                             |   |      |   |                                                                |   |              |   |               |   |             |   |             |   |                                   |   |               |
| 179 | [ <a href="#">postketo_bc</a> ]<br>Show the field ONLY if:<br>[postketo_edata] = '1'                                     | Specify how criteria are met, as outlined below (BASED score description guide):                                                                                                                                                                                             | text                                                                                                                                                                                                                                                                                                                                                                                                                                        |   |      |   |                                                                |   |              |   |               |   |             |   |             |   |                                   |   |               |
| 180 | [ <a href="#">basedscore5</a> ]<br>Show the field ONLY if:<br>[postketo_edata] = '1'                                     | BASED score description guide:                                                                                                                                                                                                                                               | descriptive                                                                                                                                                                                                                                                                                                                                                                                                                                 |   |      |   |                                                                |   |              |   |               |   |             |   |             |   |                                   |   |               |
| 181 | [ <a href="#">nisc_posteeg</a> ]<br>Show the field ONLY if:<br>[cdk15_var] = "2"                                         | Section Header: <i>Post-Treatment EEG Information NISC</i><br>Is there post-treatment EEG information for the control patient?                                                                                                                                               | radio<br><table border="1"> <tr><td>1</td><td>Yes</td></tr> <tr><td>2</td><td>No</td></tr> </table>                                                                                                                                                                                                                                                                                                                                         | 1 | Yes  | 2 | No                                                             |   |              |   |               |   |             |   |             |   |                                   |   |               |
| 1   | Yes                                                                                                                      |                                                                                                                                                                                                                                                                              |                                                                                                                                                                                                                                                                                                                                                                                                                                             |   |      |   |                                                                |   |              |   |               |   |             |   |             |   |                                   |   |               |
| 2   | No                                                                                                                       |                                                                                                                                                                                                                                                                              |                                                                                                                                                                                                                                                                                                                                                                                                                                             |   |      |   |                                                                |   |              |   |               |   |             |   |             |   |                                   |   |               |

|     |                                                                                                                           |                                                      |                                                                                                                                                                                                                                                                                                                                                                                                                                                                                                                                      |   |                     |                   |                                                                |                     |                         |   |                     |               |             |                     |                               |   |                                   |                        |               |                    |                         |
|-----|---------------------------------------------------------------------------------------------------------------------------|------------------------------------------------------|--------------------------------------------------------------------------------------------------------------------------------------------------------------------------------------------------------------------------------------------------------------------------------------------------------------------------------------------------------------------------------------------------------------------------------------------------------------------------------------------------------------------------------------|---|---------------------|-------------------|----------------------------------------------------------------|---------------------|-------------------------|---|---------------------|---------------|-------------|---------------------|-------------------------------|---|-----------------------------------|------------------------|---------------|--------------------|-------------------------|
| 182 | <p>[ <b>nisc_eegfeatures</b> ]</p> <p>Show the field ONLY if:<br/>[nisc_posteeg]='1' and [cdkl5_var] = "2"</p>            | EEG features:                                        | <p>checkbox</p> <table border="1"> <tr> <td>2</td> <td>nisc_eegfeatures__2</td> <td>Hypsarrhythmia</td> </tr> <tr> <td>3</td> <td>nisc_eegfeatures__3</td> <td>Modified hypsarrhythmia</td> </tr> <tr> <td>4</td> <td>nisc_eegfeatures__4</td> <td>Other</td> </tr> <tr> <td>5</td> <td>nisc_eegfeatures__5</td> <td>Normal</td> </tr> <tr> <td>6</td> <td>nisc_eegfeatures__6</td> <td>Any abnormality [NISC]</td> </tr> </table>                                                                                                   | 2 | nisc_eegfeatures__2 | Hypsarrhythmia    | 3                                                              | nisc_eegfeatures__3 | Modified hypsarrhythmia | 4 | nisc_eegfeatures__4 | Other         | 5           | nisc_eegfeatures__5 | Normal                        | 6 | nisc_eegfeatures__6               | Any abnormality [NISC] |               |                    |                         |
| 2   | nisc_eegfeatures__2                                                                                                       | Hypsarrhythmia                                       |                                                                                                                                                                                                                                                                                                                                                                                                                                                                                                                                      |   |                     |                   |                                                                |                     |                         |   |                     |               |             |                     |                               |   |                                   |                        |               |                    |                         |
| 3   | nisc_eegfeatures__3                                                                                                       | Modified hypsarrhythmia                              |                                                                                                                                                                                                                                                                                                                                                                                                                                                                                                                                      |   |                     |                   |                                                                |                     |                         |   |                     |               |             |                     |                               |   |                                   |                        |               |                    |                         |
| 4   | nisc_eegfeatures__4                                                                                                       | Other                                                |                                                                                                                                                                                                                                                                                                                                                                                                                                                                                                                                      |   |                     |                   |                                                                |                     |                         |   |                     |               |             |                     |                               |   |                                   |                        |               |                    |                         |
| 5   | nisc_eegfeatures__5                                                                                                       | Normal                                               |                                                                                                                                                                                                                                                                                                                                                                                                                                                                                                                                      |   |                     |                   |                                                                |                     |                         |   |                     |               |             |                     |                               |   |                                   |                        |               |                    |                         |
| 6   | nisc_eegfeatures__6                                                                                                       | Any abnormality [NISC]                               |                                                                                                                                                                                                                                                                                                                                                                                                                                                                                                                                      |   |                     |                   |                                                                |                     |                         |   |                     |               |             |                     |                               |   |                                   |                        |               |                    |                         |
| 183 | <p>[ <b>nisc_eegfeatures_2</b> ]</p> <p>Show the field ONLY if:<br/>[nisc_eegfeatures(4)] = '1' and [cdkl5_var] = "2"</p> | If other, please add any relevant notes:             | notes                                                                                                                                                                                                                                                                                                                                                                                                                                                                                                                                |   |                     |                   |                                                                |                     |                         |   |                     |               |             |                     |                               |   |                                   |                        |               |                    |                         |
| 184 | <p>[ <b>nisc_background</b> ]</p> <p>Show the field ONLY if:<br/>[nisc_posteeg]='1' and [cdkl5_var] = "2"</p>             | Check any background information that applies:       | <p>checkbox</p> <table border="1"> <tr> <td>1</td> <td>nisc_background__1</td> <td>Burst suppression</td> </tr> <tr> <td>2</td> <td>nisc_background__2</td> <td>Generalized slowing</td> </tr> <tr> <td>3</td> <td>nisc_background__3</td> <td>Focal slowing</td> </tr> <tr> <td>4</td> <td>nisc_background__4</td> <td>Normal PDR and sleep features</td> </tr> <tr> <td>5</td> <td>nisc_background__5</td> <td>Abnormal PDR</td> </tr> <tr> <td>6</td> <td>nisc_background__6</td> <td>Abnormal sleep features</td> </tr> </table> | 1 | nisc_background__1  | Burst suppression | 2                                                              | nisc_background__2  | Generalized slowing     | 3 | nisc_background__3  | Focal slowing | 4           | nisc_background__4  | Normal PDR and sleep features | 5 | nisc_background__5                | Abnormal PDR           | 6             | nisc_background__6 | Abnormal sleep features |
| 1   | nisc_background__1                                                                                                        | Burst suppression                                    |                                                                                                                                                                                                                                                                                                                                                                                                                                                                                                                                      |   |                     |                   |                                                                |                     |                         |   |                     |               |             |                     |                               |   |                                   |                        |               |                    |                         |
| 2   | nisc_background__2                                                                                                        | Generalized slowing                                  |                                                                                                                                                                                                                                                                                                                                                                                                                                                                                                                                      |   |                     |                   |                                                                |                     |                         |   |                     |               |             |                     |                               |   |                                   |                        |               |                    |                         |
| 3   | nisc_background__3                                                                                                        | Focal slowing                                        |                                                                                                                                                                                                                                                                                                                                                                                                                                                                                                                                      |   |                     |                   |                                                                |                     |                         |   |                     |               |             |                     |                               |   |                                   |                        |               |                    |                         |
| 4   | nisc_background__4                                                                                                        | Normal PDR and sleep features                        |                                                                                                                                                                                                                                                                                                                                                                                                                                                                                                                                      |   |                     |                   |                                                                |                     |                         |   |                     |               |             |                     |                               |   |                                   |                        |               |                    |                         |
| 5   | nisc_background__5                                                                                                        | Abnormal PDR                                         |                                                                                                                                                                                                                                                                                                                                                                                                                                                                                                                                      |   |                     |                   |                                                                |                     |                         |   |                     |               |             |                     |                               |   |                                   |                        |               |                    |                         |
| 6   | nisc_background__6                                                                                                        | Abnormal sleep features                              |                                                                                                                                                                                                                                                                                                                                                                                                                                                                                                                                      |   |                     |                   |                                                                |                     |                         |   |                     |               |             |                     |                               |   |                                   |                        |               |                    |                         |
| 185 | <p>[ <b>nisc_interictal</b> ]</p> <p>Show the field ONLY if:<br/>[nisc_posteeg]='1' and [cdkl5_var] = "2"</p>             | Do any of the following interictal activities apply? | <p>radio</p> <table border="1"> <tr> <td>0</td> <td>None</td> </tr> <tr> <td>1</td> <td>Multifocal (3 or more foci, independent from both hemispheres)</td> </tr> <tr> <td>3</td> <td>Single focus</td> </tr> <tr> <td>4</td> <td>Two foci only</td> </tr> <tr> <td>5</td> <td>Hemispheric</td> </tr> <tr> <td>6</td> <td>Generalized</td> </tr> <tr> <td>7</td> <td>Generalized plus focal/multifocal</td> </tr> <tr> <td>9</td> <td>Not available</td> </tr> </table>                                                              | 0 | None                | 1                 | Multifocal (3 or more foci, independent from both hemispheres) | 3                   | Single focus            | 4 | Two foci only       | 5             | Hemispheric | 6                   | Generalized                   | 7 | Generalized plus focal/multifocal | 9                      | Not available |                    |                         |
| 0   | None                                                                                                                      |                                                      |                                                                                                                                                                                                                                                                                                                                                                                                                                                                                                                                      |   |                     |                   |                                                                |                     |                         |   |                     |               |             |                     |                               |   |                                   |                        |               |                    |                         |
| 1   | Multifocal (3 or more foci, independent from both hemispheres)                                                            |                                                      |                                                                                                                                                                                                                                                                                                                                                                                                                                                                                                                                      |   |                     |                   |                                                                |                     |                         |   |                     |               |             |                     |                               |   |                                   |                        |               |                    |                         |
| 3   | Single focus                                                                                                              |                                                      |                                                                                                                                                                                                                                                                                                                                                                                                                                                                                                                                      |   |                     |                   |                                                                |                     |                         |   |                     |               |             |                     |                               |   |                                   |                        |               |                    |                         |
| 4   | Two foci only                                                                                                             |                                                      |                                                                                                                                                                                                                                                                                                                                                                                                                                                                                                                                      |   |                     |                   |                                                                |                     |                         |   |                     |               |             |                     |                               |   |                                   |                        |               |                    |                         |
| 5   | Hemispheric                                                                                                               |                                                      |                                                                                                                                                                                                                                                                                                                                                                                                                                                                                                                                      |   |                     |                   |                                                                |                     |                         |   |                     |               |             |                     |                               |   |                                   |                        |               |                    |                         |
| 6   | Generalized                                                                                                               |                                                      |                                                                                                                                                                                                                                                                                                                                                                                                                                                                                                                                      |   |                     |                   |                                                                |                     |                         |   |                     |               |             |                     |                               |   |                                   |                        |               |                    |                         |
| 7   | Generalized plus focal/multifocal                                                                                         |                                                      |                                                                                                                                                                                                                                                                                                                                                                                                                                                                                                                                      |   |                     |                   |                                                                |                     |                         |   |                     |               |             |                     |                               |   |                                   |                        |               |                    |                         |
| 9   | Not available                                                                                                             |                                                      |                                                                                                                                                                                                                                                                                                                                                                                                                                                                                                                                      |   |                     |                   |                                                                |                     |                         |   |                     |               |             |                     |                               |   |                                   |                        |               |                    |                         |

|     |                                                                             |                                                                                                                                                                                           |                                                                                                                                                                                                                             |   |     |   |    |   |                                                         |   |         |
|-----|-----------------------------------------------------------------------------|-------------------------------------------------------------------------------------------------------------------------------------------------------------------------------------------|-----------------------------------------------------------------------------------------------------------------------------------------------------------------------------------------------------------------------------|---|-----|---|----|---|---------------------------------------------------------|---|---------|
| 186 | [ <b>spasm_free</b> ]                                                       | Section Header: <i>Long term control and 2nd line treatments</i><br>Spasm free for greater than 3 months at last follow-up (okay if prior relapse)?                                       | radio<br><table border="1"> <tr><td>1</td><td>Yes</td></tr> <tr><td>2</td><td>No</td></tr> <tr><td>9</td><td>Unknown</td></tr> </table>                                                                                     | 1 | Yes | 2 | No | 9 | Unknown                                                 |   |         |
| 1   | Yes                                                                         |                                                                                                                                                                                           |                                                                                                                                                                                                                             |   |     |   |    |   |                                                         |   |         |
| 2   | No                                                                          |                                                                                                                                                                                           |                                                                                                                                                                                                                             |   |     |   |    |   |                                                         |   |         |
| 9   | Unknown                                                                     |                                                                                                                                                                                           |                                                                                                                                                                                                                             |   |     |   |    |   |                                                         |   |         |
| 187 | [ <b>spasm_freeonset</b> ]<br>Show the field ONLY if:<br>[spasm_free] = '1' | If yes, what was the time to spasm freedom from onset (days):<br><i>integer</i>                                                                                                           | text (integer)                                                                                                                                                                                                              |   |     |   |    |   |                                                         |   |         |
| 188 | [ <b>response</b> ]                                                         | Was there a full response to ACTH, prednisolone and /or vigabatrin?<br><i>Only answer "Yes" if FULL response</i>                                                                          | radio<br><table border="1"> <tr><td>1</td><td>Yes</td></tr> <tr><td>2</td><td>No</td></tr> </table>                                                                                                                         | 1 | Yes | 2 | No |   |                                                         |   |         |
| 1   | Yes                                                                         |                                                                                                                                                                                           |                                                                                                                                                                                                                             |   |     |   |    |   |                                                         |   |         |
| 2   | No                                                                          |                                                                                                                                                                                           |                                                                                                                                                                                                                             |   |     |   |    |   |                                                         |   |         |
| 189 | [ <b>relapse</b> ]<br>Show the field ONLY if:<br>[response] = '1'           | If there was full response, was there relapse (any recurrence of cluster of more than one spasm after being a responder)?                                                                 | radio<br><table border="1"> <tr><td>1</td><td>Yes</td></tr> <tr><td>2</td><td>No</td></tr> </table>                                                                                                                         | 1 | Yes | 2 | No |   |                                                         |   |         |
| 1   | Yes                                                                         |                                                                                                                                                                                           |                                                                                                                                                                                                                             |   |     |   |    |   |                                                         |   |         |
| 2   | No                                                                          |                                                                                                                                                                                           |                                                                                                                                                                                                                             |   |     |   |    |   |                                                         |   |         |
| 190 | [ <b>relapse_age</b> ]<br>Show the field ONLY if:<br>[relapse] = '1'        | If there was a relapse, at what age (in months)?<br><i>integer</i>                                                                                                                        | text (integer)                                                                                                                                                                                                              |   |     |   |    |   |                                                         |   |         |
| 191 | [ <b>spasms_age</b> ]                                                       | Age of last known spasms (in months):<br><i>integer</i>                                                                                                                                   | text (integer)                                                                                                                                                                                                              |   |     |   |    |   |                                                         |   |         |
| 192 | [ <b>resp_line2</b> ]                                                       | Did the child have full response to 2nd line medications for spasms (2-4 weeks from max dose)?<br><i>2nd line = Any ASM other than ACTH, prednisolone or vigabatrin, given for spasms</i> | radio<br><table border="1"> <tr><td>1</td><td>Yes</td></tr> <tr><td>2</td><td>No</td></tr> <tr><td>0</td><td>N/A (was not on any second-line medications for spasms)</td></tr> <tr><td>9</td><td>Unknown</td></tr> </table> | 1 | Yes | 2 | No | 0 | N/A (was not on any second-line medications for spasms) | 9 | Unknown |
| 1   | Yes                                                                         |                                                                                                                                                                                           |                                                                                                                                                                                                                             |   |     |   |    |   |                                                         |   |         |
| 2   | No                                                                          |                                                                                                                                                                                           |                                                                                                                                                                                                                             |   |     |   |    |   |                                                         |   |         |
| 0   | N/A (was not on any second-line medications for spasms)                     |                                                                                                                                                                                           |                                                                                                                                                                                                                             |   |     |   |    |   |                                                         |   |         |
| 9   | Unknown                                                                     |                                                                                                                                                                                           |                                                                                                                                                                                                                             |   |     |   |    |   |                                                         |   |         |

|     |                                                                                           |                                                                       |                                                                                                                                                                                                                                                                                                                                                                                                                                                                                                         |   |                        |                |    |                        |                            |   |                        |               |   |                        |            |   |                        |                                       |   |              |       |   |              |         |
|-----|-------------------------------------------------------------------------------------------|-----------------------------------------------------------------------|---------------------------------------------------------------------------------------------------------------------------------------------------------------------------------------------------------------------------------------------------------------------------------------------------------------------------------------------------------------------------------------------------------------------------------------------------------------------------------------------------------|---|------------------------|----------------|----|------------------------|----------------------------|---|------------------------|---------------|---|------------------------|------------|---|------------------------|---------------------------------------|---|--------------|-------|---|--------------|---------|
| 193 | <p>[ resp_med2 ]</p> <p>Show the field ONLY if:<br/>[resp_line2] = '1'</p>                | <p>If yes, check all that apply:</p>                                  | <p>checkbox</p> <table border="1"> <tr> <td>1</td> <td>resp_med2__1</td> <td>Topiramate</td> </tr> <tr> <td>2</td> <td>resp_med2__2</td> <td>Clobazam</td> </tr> <tr> <td>3</td> <td>resp_med2__3</td> <td>Valproic Acid</td> </tr> <tr> <td>4</td> <td>resp_med2__4</td> <td>Rufinamide</td> </tr> <tr> <td>5</td> <td>resp_med2__5</td> <td>Levetiracetam</td> </tr> <tr> <td>6</td> <td>resp_med2__6</td> <td>Other</td> </tr> <tr> <td>7</td> <td>resp_med2__7</td> <td>Unknown</td> </tr> </table> | 1 | resp_med2__1           | Topiramate     | 2  | resp_med2__2           | Clobazam                   | 3 | resp_med2__3           | Valproic Acid | 4 | resp_med2__4           | Rufinamide | 5 | resp_med2__5           | Levetiracetam                         | 6 | resp_med2__6 | Other | 7 | resp_med2__7 | Unknown |
| 1   | resp_med2__1                                                                              | Topiramate                                                            |                                                                                                                                                                                                                                                                                                                                                                                                                                                                                                         |   |                        |                |    |                        |                            |   |                        |               |   |                        |            |   |                        |                                       |   |              |       |   |              |         |
| 2   | resp_med2__2                                                                              | Clobazam                                                              |                                                                                                                                                                                                                                                                                                                                                                                                                                                                                                         |   |                        |                |    |                        |                            |   |                        |               |   |                        |            |   |                        |                                       |   |              |       |   |              |         |
| 3   | resp_med2__3                                                                              | Valproic Acid                                                         |                                                                                                                                                                                                                                                                                                                                                                                                                                                                                                         |   |                        |                |    |                        |                            |   |                        |               |   |                        |            |   |                        |                                       |   |              |       |   |              |         |
| 4   | resp_med2__4                                                                              | Rufinamide                                                            |                                                                                                                                                                                                                                                                                                                                                                                                                                                                                                         |   |                        |                |    |                        |                            |   |                        |               |   |                        |            |   |                        |                                       |   |              |       |   |              |         |
| 5   | resp_med2__5                                                                              | Levetiracetam                                                         |                                                                                                                                                                                                                                                                                                                                                                                                                                                                                                         |   |                        |                |    |                        |                            |   |                        |               |   |                        |            |   |                        |                                       |   |              |       |   |              |         |
| 6   | resp_med2__6                                                                              | Other                                                                 |                                                                                                                                                                                                                                                                                                                                                                                                                                                                                                         |   |                        |                |    |                        |                            |   |                        |               |   |                        |            |   |                        |                                       |   |              |       |   |              |         |
| 7   | resp_med2__7                                                                              | Unknown                                                               |                                                                                                                                                                                                                                                                                                                                                                                                                                                                                                         |   |                        |                |    |                        |                            |   |                        |               |   |                        |            |   |                        |                                       |   |              |       |   |              |         |
| 194 | <p>[ topiramate_eeg2 ]</p> <p>Show the field ONLY if:<br/>[resp_med2(1)] = '1'</p>        | <p>Was there an EEG after treatment with topiramate?</p>              | <p>radio</p> <table border="1"> <tr> <td>1</td> <td>Yes</td> </tr> <tr> <td>2</td> <td>No</td> </tr> <tr> <td>9</td> <td>Unknown</td> </tr> </table>                                                                                                                                                                                                                                                                                                                                                    | 1 | Yes                    | 2              | No | 9                      | Unknown                    |   |                        |               |   |                        |            |   |                        |                                       |   |              |       |   |              |         |
| 1   | Yes                                                                                       |                                                                       |                                                                                                                                                                                                                                                                                                                                                                                                                                                                                                         |   |                        |                |    |                        |                            |   |                        |               |   |                        |            |   |                        |                                       |   |              |       |   |              |         |
| 2   | No                                                                                        |                                                                       |                                                                                                                                                                                                                                                                                                                                                                                                                                                                                                         |   |                        |                |    |                        |                            |   |                        |               |   |                        |            |   |                        |                                       |   |              |       |   |              |         |
| 9   | Unknown                                                                                   |                                                                       |                                                                                                                                                                                                                                                                                                                                                                                                                                                                                                         |   |                        |                |    |                        |                            |   |                        |               |   |                        |            |   |                        |                                       |   |              |       |   |              |         |
| 195 | <p>[ topiramate_feature2 ]</p> <p>Show the field ONLY if:<br/>[topiramate_eeg2] = '1'</p> | <p>If yes, check all that apply:<br/><i>select all that apply</i></p> | <p>checkbox</p> <table border="1"> <tr> <td>2</td> <td>topiramate_feature2__2</td> <td>Hypsarrhythmia</td> </tr> <tr> <td>3</td> <td>topiramate_feature2__3</td> <td>Modified<br/>hypsarrhythmia</td> </tr> <tr> <td>4</td> <td>topiramate_feature2__4</td> <td>Other</td> </tr> <tr> <td>5</td> <td>topiramate_feature2__5</td> <td>Normal</td> </tr> <tr> <td>6</td> <td>topiramate_feature2__6</td> <td>Any Abnormality<br/>[NISC cohort only]</td> </tr> </table>                                   | 2 | topiramate_feature2__2 | Hypsarrhythmia | 3  | topiramate_feature2__3 | Modified<br>hypsarrhythmia | 4 | topiramate_feature2__4 | Other         | 5 | topiramate_feature2__5 | Normal     | 6 | topiramate_feature2__6 | Any Abnormality<br>[NISC cohort only] |   |              |       |   |              |         |
| 2   | topiramate_feature2__2                                                                    | Hypsarrhythmia                                                        |                                                                                                                                                                                                                                                                                                                                                                                                                                                                                                         |   |                        |                |    |                        |                            |   |                        |               |   |                        |            |   |                        |                                       |   |              |       |   |              |         |
| 3   | topiramate_feature2__3                                                                    | Modified<br>hypsarrhythmia                                            |                                                                                                                                                                                                                                                                                                                                                                                                                                                                                                         |   |                        |                |    |                        |                            |   |                        |               |   |                        |            |   |                        |                                       |   |              |       |   |              |         |
| 4   | topiramate_feature2__4                                                                    | Other                                                                 |                                                                                                                                                                                                                                                                                                                                                                                                                                                                                                         |   |                        |                |    |                        |                            |   |                        |               |   |                        |            |   |                        |                                       |   |              |       |   |              |         |
| 5   | topiramate_feature2__5                                                                    | Normal                                                                |                                                                                                                                                                                                                                                                                                                                                                                                                                                                                                         |   |                        |                |    |                        |                            |   |                        |               |   |                        |            |   |                        |                                       |   |              |       |   |              |         |
| 6   | topiramate_feature2__6                                                                    | Any Abnormality<br>[NISC cohort only]                                 |                                                                                                                                                                                                                                                                                                                                                                                                                                                                                                         |   |                        |                |    |                        |                            |   |                        |               |   |                        |            |   |                        |                                       |   |              |       |   |              |         |

|     |                                                                                                                                                           |                                                             |                                                                                                                                                                                                                                                                                                                                                                                                                                                                                                                                                                                                                                                                                                                                                                                                                                                                                                                                                                                                                                                                                                              |   |                      |                   |                                                                |                      |                     |   |                      |               |             |                      |                               |   |                                   |              |               |                      |                         |
|-----|-----------------------------------------------------------------------------------------------------------------------------------------------------------|-------------------------------------------------------------|--------------------------------------------------------------------------------------------------------------------------------------------------------------------------------------------------------------------------------------------------------------------------------------------------------------------------------------------------------------------------------------------------------------------------------------------------------------------------------------------------------------------------------------------------------------------------------------------------------------------------------------------------------------------------------------------------------------------------------------------------------------------------------------------------------------------------------------------------------------------------------------------------------------------------------------------------------------------------------------------------------------------------------------------------------------------------------------------------------------|---|----------------------|-------------------|----------------------------------------------------------------|----------------------|---------------------|---|----------------------|---------------|-------------|----------------------|-------------------------------|---|-----------------------------------|--------------|---------------|----------------------|-------------------------|
| 196 | <p>[ <a href="#">topiramate_other2</a> ]</p> <p>Show the field ONLY if:<br/>[topiramate_feature2(4)] = '1'</p>                                            | <p>If other, please check all that apply:</p>               | <p>checkbox</p> <table border="1"> <tr> <td data-bbox="1354 123 1388 172">1</td> <td data-bbox="1388 123 1688 172">topiramate_other2__1</td> <td data-bbox="1688 123 1997 172">Burst suppression</td> </tr> <tr> <td data-bbox="1354 172 1388 220">2</td> <td data-bbox="1388 172 1688 220">topiramate_other2__2</td> <td data-bbox="1688 172 1997 220">Generalized slowing</td> </tr> <tr> <td data-bbox="1354 220 1388 269">3</td> <td data-bbox="1388 220 1688 269">topiramate_other2__3</td> <td data-bbox="1688 220 1997 269">Focal slowing</td> </tr> <tr> <td data-bbox="1354 269 1388 367">4</td> <td data-bbox="1388 269 1688 367">topiramate_other2__4</td> <td data-bbox="1688 269 1997 367">Normal PDR and sleep features</td> </tr> <tr> <td data-bbox="1354 367 1388 415">5</td> <td data-bbox="1388 367 1688 415">topiramate_other2__5</td> <td data-bbox="1688 367 1997 415">Abnormal PDR</td> </tr> <tr> <td data-bbox="1354 415 1388 513">6</td> <td data-bbox="1388 415 1688 513">topiramate_other2__6</td> <td data-bbox="1688 415 1997 513">Abnormal sleep features</td> </tr> </table> | 1 | topiramate_other2__1 | Burst suppression | 2                                                              | topiramate_other2__2 | Generalized slowing | 3 | topiramate_other2__3 | Focal slowing | 4           | topiramate_other2__4 | Normal PDR and sleep features | 5 | topiramate_other2__5              | Abnormal PDR | 6             | topiramate_other2__6 | Abnormal sleep features |
| 1   | topiramate_other2__1                                                                                                                                      | Burst suppression                                           |                                                                                                                                                                                                                                                                                                                                                                                                                                                                                                                                                                                                                                                                                                                                                                                                                                                                                                                                                                                                                                                                                                              |   |                      |                   |                                                                |                      |                     |   |                      |               |             |                      |                               |   |                                   |              |               |                      |                         |
| 2   | topiramate_other2__2                                                                                                                                      | Generalized slowing                                         |                                                                                                                                                                                                                                                                                                                                                                                                                                                                                                                                                                                                                                                                                                                                                                                                                                                                                                                                                                                                                                                                                                              |   |                      |                   |                                                                |                      |                     |   |                      |               |             |                      |                               |   |                                   |              |               |                      |                         |
| 3   | topiramate_other2__3                                                                                                                                      | Focal slowing                                               |                                                                                                                                                                                                                                                                                                                                                                                                                                                                                                                                                                                                                                                                                                                                                                                                                                                                                                                                                                                                                                                                                                              |   |                      |                   |                                                                |                      |                     |   |                      |               |             |                      |                               |   |                                   |              |               |                      |                         |
| 4   | topiramate_other2__4                                                                                                                                      | Normal PDR and sleep features                               |                                                                                                                                                                                                                                                                                                                                                                                                                                                                                                                                                                                                                                                                                                                                                                                                                                                                                                                                                                                                                                                                                                              |   |                      |                   |                                                                |                      |                     |   |                      |               |             |                      |                               |   |                                   |              |               |                      |                         |
| 5   | topiramate_other2__5                                                                                                                                      | Abnormal PDR                                                |                                                                                                                                                                                                                                                                                                                                                                                                                                                                                                                                                                                                                                                                                                                                                                                                                                                                                                                                                                                                                                                                                                              |   |                      |                   |                                                                |                      |                     |   |                      |               |             |                      |                               |   |                                   |              |               |                      |                         |
| 6   | topiramate_other2__6                                                                                                                                      | Abnormal sleep features                                     |                                                                                                                                                                                                                                                                                                                                                                                                                                                                                                                                                                                                                                                                                                                                                                                                                                                                                                                                                                                                                                                                                                              |   |                      |                   |                                                                |                      |                     |   |                      |               |             |                      |                               |   |                                   |              |               |                      |                         |
| 197 | <p>[ <a href="#">topiramate_other3</a> ]</p> <p>Show the field ONLY if:<br/>[topiramate_feature2(4)] = '1'</p>                                            | <p>If other, please add any relevant notes:</p>             | <p>notes</p>                                                                                                                                                                                                                                                                                                                                                                                                                                                                                                                                                                                                                                                                                                                                                                                                                                                                                                                                                                                                                                                                                                 |   |                      |                   |                                                                |                      |                     |   |                      |               |             |                      |                               |   |                                   |              |               |                      |                         |
| 198 | <p>[ <a href="#">topiramate_interictal2</a> ]</p> <p>Show the field ONLY if:<br/>[topiramate_feature2(4)] = '1'<br/>or [topiramate_feature2(6)] = '1'</p> | <p>Do any of the following interictal activities apply?</p> | <p>radio</p> <table border="1"> <tr> <td data-bbox="1354 708 1388 756">0</td> <td data-bbox="1388 708 1997 756">None</td> </tr> <tr> <td data-bbox="1354 756 1388 854">1</td> <td data-bbox="1388 756 1997 854">Multifocal (3 or more foci, independent from both hemispheres)</td> </tr> <tr> <td data-bbox="1354 854 1388 902">3</td> <td data-bbox="1388 854 1997 902">Single focus</td> </tr> <tr> <td data-bbox="1354 902 1388 951">4</td> <td data-bbox="1388 902 1997 951">Two foci only</td> </tr> <tr> <td data-bbox="1354 951 1388 1000">5</td> <td data-bbox="1388 951 1997 1000">Hemispheric</td> </tr> <tr> <td data-bbox="1354 1000 1388 1049">6</td> <td data-bbox="1388 1000 1997 1049">Generalized</td> </tr> <tr> <td data-bbox="1354 1049 1388 1097">7</td> <td data-bbox="1388 1049 1997 1097">Generalized plus focal/multifocal</td> </tr> <tr> <td data-bbox="1354 1097 1388 1162">9</td> <td data-bbox="1388 1097 1997 1162">Not available</td> </tr> </table>                                                                                                                        | 0 | None                 | 1                 | Multifocal (3 or more foci, independent from both hemispheres) | 3                    | Single focus        | 4 | Two foci only        | 5             | Hemispheric | 6                    | Generalized                   | 7 | Generalized plus focal/multifocal | 9            | Not available |                      |                         |
| 0   | None                                                                                                                                                      |                                                             |                                                                                                                                                                                                                                                                                                                                                                                                                                                                                                                                                                                                                                                                                                                                                                                                                                                                                                                                                                                                                                                                                                              |   |                      |                   |                                                                |                      |                     |   |                      |               |             |                      |                               |   |                                   |              |               |                      |                         |
| 1   | Multifocal (3 or more foci, independent from both hemispheres)                                                                                            |                                                             |                                                                                                                                                                                                                                                                                                                                                                                                                                                                                                                                                                                                                                                                                                                                                                                                                                                                                                                                                                                                                                                                                                              |   |                      |                   |                                                                |                      |                     |   |                      |               |             |                      |                               |   |                                   |              |               |                      |                         |
| 3   | Single focus                                                                                                                                              |                                                             |                                                                                                                                                                                                                                                                                                                                                                                                                                                                                                                                                                                                                                                                                                                                                                                                                                                                                                                                                                                                                                                                                                              |   |                      |                   |                                                                |                      |                     |   |                      |               |             |                      |                               |   |                                   |              |               |                      |                         |
| 4   | Two foci only                                                                                                                                             |                                                             |                                                                                                                                                                                                                                                                                                                                                                                                                                                                                                                                                                                                                                                                                                                                                                                                                                                                                                                                                                                                                                                                                                              |   |                      |                   |                                                                |                      |                     |   |                      |               |             |                      |                               |   |                                   |              |               |                      |                         |
| 5   | Hemispheric                                                                                                                                               |                                                             |                                                                                                                                                                                                                                                                                                                                                                                                                                                                                                                                                                                                                                                                                                                                                                                                                                                                                                                                                                                                                                                                                                              |   |                      |                   |                                                                |                      |                     |   |                      |               |             |                      |                               |   |                                   |              |               |                      |                         |
| 6   | Generalized                                                                                                                                               |                                                             |                                                                                                                                                                                                                                                                                                                                                                                                                                                                                                                                                                                                                                                                                                                                                                                                                                                                                                                                                                                                                                                                                                              |   |                      |                   |                                                                |                      |                     |   |                      |               |             |                      |                               |   |                                   |              |               |                      |                         |
| 7   | Generalized plus focal/multifocal                                                                                                                         |                                                             |                                                                                                                                                                                                                                                                                                                                                                                                                                                                                                                                                                                                                                                                                                                                                                                                                                                                                                                                                                                                                                                                                                              |   |                      |                   |                                                                |                      |                     |   |                      |               |             |                      |                               |   |                                   |              |               |                      |                         |
| 9   | Not available                                                                                                                                             |                                                             |                                                                                                                                                                                                                                                                                                                                                                                                                                                                                                                                                                                                                                                                                                                                                                                                                                                                                                                                                                                                                                                                                                              |   |                      |                   |                                                                |                      |                     |   |                      |               |             |                      |                               |   |                                   |              |               |                      |                         |
| 199 | <p>[ <a href="#">clobazam_eeg2</a> ]</p> <p>Show the field ONLY if:<br/>[resp_med2(2)] = '1'</p>                                                          | <p>Was there an EEG after treatment with clobazam?</p>      | <p>radio</p> <table border="1"> <tr> <td data-bbox="1354 1227 1388 1276">1</td> <td data-bbox="1388 1227 1528 1276">Yes</td> </tr> <tr> <td data-bbox="1354 1276 1388 1325">2</td> <td data-bbox="1388 1276 1528 1325">No</td> </tr> <tr> <td data-bbox="1354 1325 1388 1373">9</td> <td data-bbox="1388 1325 1528 1373">Unknown</td> </tr> </table>                                                                                                                                                                                                                                                                                                                                                                                                                                                                                                                                                                                                                                                                                                                                                         | 1 | Yes                  | 2                 | No                                                             | 9                    | Unknown             |   |                      |               |             |                      |                               |   |                                   |              |               |                      |                         |
| 1   | Yes                                                                                                                                                       |                                                             |                                                                                                                                                                                                                                                                                                                                                                                                                                                                                                                                                                                                                                                                                                                                                                                                                                                                                                                                                                                                                                                                                                              |   |                      |                   |                                                                |                      |                     |   |                      |               |             |                      |                               |   |                                   |              |               |                      |                         |
| 2   | No                                                                                                                                                        |                                                             |                                                                                                                                                                                                                                                                                                                                                                                                                                                                                                                                                                                                                                                                                                                                                                                                                                                                                                                                                                                                                                                                                                              |   |                      |                   |                                                                |                      |                     |   |                      |               |             |                      |                               |   |                                   |              |               |                      |                         |
| 9   | Unknown                                                                                                                                                   |                                                             |                                                                                                                                                                                                                                                                                                                                                                                                                                                                                                                                                                                                                                                                                                                                                                                                                                                                                                                                                                                                                                                                                                              |   |                      |                   |                                                                |                      |                     |   |                      |               |             |                      |                               |   |                                   |              |               |                      |                         |

|     |                                                                                                                                             |                                                                       |                                                                                                                                                                                                                                                                                                                                                                                                                                                                                                                                                                                                                                                                                                                                                                                                                                                                                                                                                                                                                                                                                                  |   |                      |                   |                                                                |                      |                         |   |                      |               |             |                      |                               |   |                                   |                                    |               |                    |                         |
|-----|---------------------------------------------------------------------------------------------------------------------------------------------|-----------------------------------------------------------------------|--------------------------------------------------------------------------------------------------------------------------------------------------------------------------------------------------------------------------------------------------------------------------------------------------------------------------------------------------------------------------------------------------------------------------------------------------------------------------------------------------------------------------------------------------------------------------------------------------------------------------------------------------------------------------------------------------------------------------------------------------------------------------------------------------------------------------------------------------------------------------------------------------------------------------------------------------------------------------------------------------------------------------------------------------------------------------------------------------|---|----------------------|-------------------|----------------------------------------------------------------|----------------------|-------------------------|---|----------------------|---------------|-------------|----------------------|-------------------------------|---|-----------------------------------|------------------------------------|---------------|--------------------|-------------------------|
| 200 | <p>[ <b>clobazam_feature2</b> ]</p> <p>Show the field ONLY if:<br/>[clobazam_eeg2] = '1'</p>                                                | <p>If yes, check all that apply:<br/><i>select all that apply</i></p> | <p>checkbox</p> <table border="1"> <tr> <td data-bbox="1356 123 1388 172">2</td> <td data-bbox="1388 123 1692 172">clobazam_feature2__2</td> <td data-bbox="1692 123 1986 172">Hypsarrhythmia</td> </tr> <tr> <td data-bbox="1356 172 1388 261">3</td> <td data-bbox="1388 172 1692 261">clobazam_feature2__3</td> <td data-bbox="1692 172 1986 261">Modified hypsarrhythmia</td> </tr> <tr> <td data-bbox="1356 261 1388 318">4</td> <td data-bbox="1388 261 1692 318">clobazam_feature2__4</td> <td data-bbox="1692 261 1986 318">Other</td> </tr> <tr> <td data-bbox="1356 318 1388 367">5</td> <td data-bbox="1388 318 1692 367">clobazam_feature2__5</td> <td data-bbox="1692 318 1986 367">Normal</td> </tr> <tr> <td data-bbox="1356 367 1388 456">6</td> <td data-bbox="1388 367 1692 456">clobazam_feature2__6</td> <td data-bbox="1692 367 1986 456">Any abnormality [NISC cohort only]</td> </tr> </table>                                                                                                                                                                            | 2 | clobazam_feature2__2 | Hypsarrhythmia    | 3                                                              | clobazam_feature2__3 | Modified hypsarrhythmia | 4 | clobazam_feature2__4 | Other         | 5           | clobazam_feature2__5 | Normal                        | 6 | clobazam_feature2__6              | Any abnormality [NISC cohort only] |               |                    |                         |
| 2   | clobazam_feature2__2                                                                                                                        | Hypsarrhythmia                                                        |                                                                                                                                                                                                                                                                                                                                                                                                                                                                                                                                                                                                                                                                                                                                                                                                                                                                                                                                                                                                                                                                                                  |   |                      |                   |                                                                |                      |                         |   |                      |               |             |                      |                               |   |                                   |                                    |               |                    |                         |
| 3   | clobazam_feature2__3                                                                                                                        | Modified hypsarrhythmia                                               |                                                                                                                                                                                                                                                                                                                                                                                                                                                                                                                                                                                                                                                                                                                                                                                                                                                                                                                                                                                                                                                                                                  |   |                      |                   |                                                                |                      |                         |   |                      |               |             |                      |                               |   |                                   |                                    |               |                    |                         |
| 4   | clobazam_feature2__4                                                                                                                        | Other                                                                 |                                                                                                                                                                                                                                                                                                                                                                                                                                                                                                                                                                                                                                                                                                                                                                                                                                                                                                                                                                                                                                                                                                  |   |                      |                   |                                                                |                      |                         |   |                      |               |             |                      |                               |   |                                   |                                    |               |                    |                         |
| 5   | clobazam_feature2__5                                                                                                                        | Normal                                                                |                                                                                                                                                                                                                                                                                                                                                                                                                                                                                                                                                                                                                                                                                                                                                                                                                                                                                                                                                                                                                                                                                                  |   |                      |                   |                                                                |                      |                         |   |                      |               |             |                      |                               |   |                                   |                                    |               |                    |                         |
| 6   | clobazam_feature2__6                                                                                                                        | Any abnormality [NISC cohort only]                                    |                                                                                                                                                                                                                                                                                                                                                                                                                                                                                                                                                                                                                                                                                                                                                                                                                                                                                                                                                                                                                                                                                                  |   |                      |                   |                                                                |                      |                         |   |                      |               |             |                      |                               |   |                                   |                                    |               |                    |                         |
| 201 | <p>[ <b>clobazam_other2</b> ]</p> <p>Show the field ONLY if:<br/>[clobazam_feature2(4)] = '1'</p>                                           | <p>If other, please check all that apply:</p>                         | <p>checkbox</p> <table border="1"> <tr> <td data-bbox="1356 513 1388 561">1</td> <td data-bbox="1388 513 1692 561">clobazam_other2__1</td> <td data-bbox="1692 513 1986 561">Burst suppression</td> </tr> <tr> <td data-bbox="1356 561 1388 618">2</td> <td data-bbox="1388 561 1692 618">clobazam_other2__2</td> <td data-bbox="1692 561 1986 618">Generalized slowing</td> </tr> <tr> <td data-bbox="1356 618 1388 675">3</td> <td data-bbox="1388 618 1692 675">clobazam_other2__3</td> <td data-bbox="1692 618 1986 675">Focal slowing</td> </tr> <tr> <td data-bbox="1356 675 1388 764">4</td> <td data-bbox="1388 675 1692 764">clobazam_other2__4</td> <td data-bbox="1692 675 1986 764">Normal PDR and sleep features</td> </tr> <tr> <td data-bbox="1356 764 1388 821">5</td> <td data-bbox="1388 764 1692 821">clobazam_other2__5</td> <td data-bbox="1692 764 1986 821">Abnormal PDR</td> </tr> <tr> <td data-bbox="1356 821 1388 862">6</td> <td data-bbox="1388 821 1692 862">clobazam_other2__6</td> <td data-bbox="1692 821 1986 862">Abnormal sleep features</td> </tr> </table> | 1 | clobazam_other2__1   | Burst suppression | 2                                                              | clobazam_other2__2   | Generalized slowing     | 3 | clobazam_other2__3   | Focal slowing | 4           | clobazam_other2__4   | Normal PDR and sleep features | 5 | clobazam_other2__5                | Abnormal PDR                       | 6             | clobazam_other2__6 | Abnormal sleep features |
| 1   | clobazam_other2__1                                                                                                                          | Burst suppression                                                     |                                                                                                                                                                                                                                                                                                                                                                                                                                                                                                                                                                                                                                                                                                                                                                                                                                                                                                                                                                                                                                                                                                  |   |                      |                   |                                                                |                      |                         |   |                      |               |             |                      |                               |   |                                   |                                    |               |                    |                         |
| 2   | clobazam_other2__2                                                                                                                          | Generalized slowing                                                   |                                                                                                                                                                                                                                                                                                                                                                                                                                                                                                                                                                                                                                                                                                                                                                                                                                                                                                                                                                                                                                                                                                  |   |                      |                   |                                                                |                      |                         |   |                      |               |             |                      |                               |   |                                   |                                    |               |                    |                         |
| 3   | clobazam_other2__3                                                                                                                          | Focal slowing                                                         |                                                                                                                                                                                                                                                                                                                                                                                                                                                                                                                                                                                                                                                                                                                                                                                                                                                                                                                                                                                                                                                                                                  |   |                      |                   |                                                                |                      |                         |   |                      |               |             |                      |                               |   |                                   |                                    |               |                    |                         |
| 4   | clobazam_other2__4                                                                                                                          | Normal PDR and sleep features                                         |                                                                                                                                                                                                                                                                                                                                                                                                                                                                                                                                                                                                                                                                                                                                                                                                                                                                                                                                                                                                                                                                                                  |   |                      |                   |                                                                |                      |                         |   |                      |               |             |                      |                               |   |                                   |                                    |               |                    |                         |
| 5   | clobazam_other2__5                                                                                                                          | Abnormal PDR                                                          |                                                                                                                                                                                                                                                                                                                                                                                                                                                                                                                                                                                                                                                                                                                                                                                                                                                                                                                                                                                                                                                                                                  |   |                      |                   |                                                                |                      |                         |   |                      |               |             |                      |                               |   |                                   |                                    |               |                    |                         |
| 6   | clobazam_other2__6                                                                                                                          | Abnormal sleep features                                               |                                                                                                                                                                                                                                                                                                                                                                                                                                                                                                                                                                                                                                                                                                                                                                                                                                                                                                                                                                                                                                                                                                  |   |                      |                   |                                                                |                      |                         |   |                      |               |             |                      |                               |   |                                   |                                    |               |                    |                         |
| 202 | <p>[ <b>clobazam_other3</b> ]</p> <p>Show the field ONLY if:<br/>[clobazam_feature2(4)] = '1'</p>                                           | <p>If other, please add any relevant notes:</p>                       | <p>notes</p>                                                                                                                                                                                                                                                                                                                                                                                                                                                                                                                                                                                                                                                                                                                                                                                                                                                                                                                                                                                                                                                                                     |   |                      |                   |                                                                |                      |                         |   |                      |               |             |                      |                               |   |                                   |                                    |               |                    |                         |
| 203 | <p>[ <b>clobazam_interictal2</b> ]</p> <p>Show the field ONLY if:<br/>[clobazam_feature2(4)] = '1' o<br/>r [clobazam_feature2(6)] = '1'</p> | <p>Do any of the following interictal activities apply?</p>           | <p>radio</p> <table border="1"> <tr> <td data-bbox="1356 1065 1388 1114">0</td> <td data-bbox="1388 1065 1986 1114">None</td> </tr> <tr> <td data-bbox="1356 1114 1388 1203">1</td> <td data-bbox="1388 1114 1986 1203">Multifocal (3 or more foci, independent from both hemispheres)</td> </tr> <tr> <td data-bbox="1356 1203 1388 1260">3</td> <td data-bbox="1388 1203 1986 1260">Single focus</td> </tr> <tr> <td data-bbox="1356 1260 1388 1317">4</td> <td data-bbox="1388 1260 1986 1317">Two foci only</td> </tr> <tr> <td data-bbox="1356 1317 1388 1373">5</td> <td data-bbox="1388 1317 1986 1373">Hemispheric</td> </tr> <tr> <td data-bbox="1356 1373 1388 1430">6</td> <td data-bbox="1388 1373 1986 1430">Generalized</td> </tr> <tr> <td data-bbox="1356 1430 1388 1487">7</td> <td data-bbox="1388 1430 1986 1487">Generalized plus focal/multifocal</td> </tr> <tr> <td data-bbox="1356 1487 1388 1528">9</td> <td data-bbox="1388 1487 1986 1528">Not available</td> </tr> </table>                                                                                          | 0 | None                 | 1                 | Multifocal (3 or more foci, independent from both hemispheres) | 3                    | Single focus            | 4 | Two foci only        | 5             | Hemispheric | 6                    | Generalized                   | 7 | Generalized plus focal/multifocal | 9                                  | Not available |                    |                         |
| 0   | None                                                                                                                                        |                                                                       |                                                                                                                                                                                                                                                                                                                                                                                                                                                                                                                                                                                                                                                                                                                                                                                                                                                                                                                                                                                                                                                                                                  |   |                      |                   |                                                                |                      |                         |   |                      |               |             |                      |                               |   |                                   |                                    |               |                    |                         |
| 1   | Multifocal (3 or more foci, independent from both hemispheres)                                                                              |                                                                       |                                                                                                                                                                                                                                                                                                                                                                                                                                                                                                                                                                                                                                                                                                                                                                                                                                                                                                                                                                                                                                                                                                  |   |                      |                   |                                                                |                      |                         |   |                      |               |             |                      |                               |   |                                   |                                    |               |                    |                         |
| 3   | Single focus                                                                                                                                |                                                                       |                                                                                                                                                                                                                                                                                                                                                                                                                                                                                                                                                                                                                                                                                                                                                                                                                                                                                                                                                                                                                                                                                                  |   |                      |                   |                                                                |                      |                         |   |                      |               |             |                      |                               |   |                                   |                                    |               |                    |                         |
| 4   | Two foci only                                                                                                                               |                                                                       |                                                                                                                                                                                                                                                                                                                                                                                                                                                                                                                                                                                                                                                                                                                                                                                                                                                                                                                                                                                                                                                                                                  |   |                      |                   |                                                                |                      |                         |   |                      |               |             |                      |                               |   |                                   |                                    |               |                    |                         |
| 5   | Hemispheric                                                                                                                                 |                                                                       |                                                                                                                                                                                                                                                                                                                                                                                                                                                                                                                                                                                                                                                                                                                                                                                                                                                                                                                                                                                                                                                                                                  |   |                      |                   |                                                                |                      |                         |   |                      |               |             |                      |                               |   |                                   |                                    |               |                    |                         |
| 6   | Generalized                                                                                                                                 |                                                                       |                                                                                                                                                                                                                                                                                                                                                                                                                                                                                                                                                                                                                                                                                                                                                                                                                                                                                                                                                                                                                                                                                                  |   |                      |                   |                                                                |                      |                         |   |                      |               |             |                      |                               |   |                                   |                                    |               |                    |                         |
| 7   | Generalized plus focal/multifocal                                                                                                           |                                                                       |                                                                                                                                                                                                                                                                                                                                                                                                                                                                                                                                                                                                                                                                                                                                                                                                                                                                                                                                                                                                                                                                                                  |   |                      |                   |                                                                |                      |                         |   |                      |               |             |                      |                               |   |                                   |                                    |               |                    |                         |
| 9   | Not available                                                                                                                               |                                                                       |                                                                                                                                                                                                                                                                                                                                                                                                                                                                                                                                                                                                                                                                                                                                                                                                                                                                                                                                                                                                                                                                                                  |   |                      |                   |                                                                |                      |                         |   |                      |               |             |                      |                               |   |                                   |                                    |               |                    |                         |

|     |                                                                                                   |                                                                       |                                                                                                                                                                                                                                                                                                                                                                                                                                                                                                                                      |   |                      |                   |    |                      |                         |   |                      |               |   |                      |                               |   |                      |                                    |   |                    |                         |
|-----|---------------------------------------------------------------------------------------------------|-----------------------------------------------------------------------|--------------------------------------------------------------------------------------------------------------------------------------------------------------------------------------------------------------------------------------------------------------------------------------------------------------------------------------------------------------------------------------------------------------------------------------------------------------------------------------------------------------------------------------|---|----------------------|-------------------|----|----------------------|-------------------------|---|----------------------|---------------|---|----------------------|-------------------------------|---|----------------------|------------------------------------|---|--------------------|-------------------------|
| 204 | <p>[ <b>valproic_eeg2</b> ]</p> <p>Show the field ONLY if:<br/>[resp_med2(3)] = '1'</p>           | <p>Was there an EEG after treatment with valproic acid?</p>           | <p>radio</p> <table border="1"> <tr> <td>1</td> <td>Yes</td> </tr> <tr> <td>2</td> <td>No</td> </tr> <tr> <td>9</td> <td>Unknown</td> </tr> </table>                                                                                                                                                                                                                                                                                                                                                                                 | 1 | Yes                  | 2                 | No | 9                    | Unknown                 |   |                      |               |   |                      |                               |   |                      |                                    |   |                    |                         |
| 1   | Yes                                                                                               |                                                                       |                                                                                                                                                                                                                                                                                                                                                                                                                                                                                                                                      |   |                      |                   |    |                      |                         |   |                      |               |   |                      |                               |   |                      |                                    |   |                    |                         |
| 2   | No                                                                                                |                                                                       |                                                                                                                                                                                                                                                                                                                                                                                                                                                                                                                                      |   |                      |                   |    |                      |                         |   |                      |               |   |                      |                               |   |                      |                                    |   |                    |                         |
| 9   | Unknown                                                                                           |                                                                       |                                                                                                                                                                                                                                                                                                                                                                                                                                                                                                                                      |   |                      |                   |    |                      |                         |   |                      |               |   |                      |                               |   |                      |                                    |   |                    |                         |
| 205 | <p>[ <b>valproic_feature2</b> ]</p> <p>Show the field ONLY if:<br/>[valproic_eeg2] = '1'</p>      | <p>If yes, check all that apply:<br/><i>select all that apply</i></p> | <p>checkbox</p> <table border="1"> <tr> <td>2</td> <td>valproic_feature2__2</td> <td>Hypsarrhythmia</td> </tr> <tr> <td>3</td> <td>valproic_feature2__3</td> <td>Modified hypsarrhythmia</td> </tr> <tr> <td>4</td> <td>valproic_feature2__4</td> <td>Other</td> </tr> <tr> <td>5</td> <td>valproic_feature2__5</td> <td>Normal</td> </tr> <tr> <td>6</td> <td>valproic_feature2__6</td> <td>Any abnormality [NISC cohort only]</td> </tr> </table>                                                                                  | 2 | valproic_feature2__2 | Hypsarrhythmia    | 3  | valproic_feature2__3 | Modified hypsarrhythmia | 4 | valproic_feature2__4 | Other         | 5 | valproic_feature2__5 | Normal                        | 6 | valproic_feature2__6 | Any abnormality [NISC cohort only] |   |                    |                         |
| 2   | valproic_feature2__2                                                                              | Hypsarrhythmia                                                        |                                                                                                                                                                                                                                                                                                                                                                                                                                                                                                                                      |   |                      |                   |    |                      |                         |   |                      |               |   |                      |                               |   |                      |                                    |   |                    |                         |
| 3   | valproic_feature2__3                                                                              | Modified hypsarrhythmia                                               |                                                                                                                                                                                                                                                                                                                                                                                                                                                                                                                                      |   |                      |                   |    |                      |                         |   |                      |               |   |                      |                               |   |                      |                                    |   |                    |                         |
| 4   | valproic_feature2__4                                                                              | Other                                                                 |                                                                                                                                                                                                                                                                                                                                                                                                                                                                                                                                      |   |                      |                   |    |                      |                         |   |                      |               |   |                      |                               |   |                      |                                    |   |                    |                         |
| 5   | valproic_feature2__5                                                                              | Normal                                                                |                                                                                                                                                                                                                                                                                                                                                                                                                                                                                                                                      |   |                      |                   |    |                      |                         |   |                      |               |   |                      |                               |   |                      |                                    |   |                    |                         |
| 6   | valproic_feature2__6                                                                              | Any abnormality [NISC cohort only]                                    |                                                                                                                                                                                                                                                                                                                                                                                                                                                                                                                                      |   |                      |                   |    |                      |                         |   |                      |               |   |                      |                               |   |                      |                                    |   |                    |                         |
| 206 | <p>[ <b>valproic_other2</b> ]</p> <p>Show the field ONLY if:<br/>[valproic_feature2(4)] = '1'</p> | <p>If other, please check all that apply:</p>                         | <p>checkbox</p> <table border="1"> <tr> <td>1</td> <td>valproic_other2__1</td> <td>Burst suppression</td> </tr> <tr> <td>2</td> <td>valproic_other2__2</td> <td>Generalized slowing</td> </tr> <tr> <td>3</td> <td>valproic_other2__3</td> <td>Focal slowing</td> </tr> <tr> <td>4</td> <td>valproic_other2__4</td> <td>Normal PDR and sleep features</td> </tr> <tr> <td>5</td> <td>valproic_other2__5</td> <td>Abnormal PDR</td> </tr> <tr> <td>6</td> <td>valproic_other2__6</td> <td>Abnormal sleep features</td> </tr> </table> | 1 | valproic_other2__1   | Burst suppression | 2  | valproic_other2__2   | Generalized slowing     | 3 | valproic_other2__3   | Focal slowing | 4 | valproic_other2__4   | Normal PDR and sleep features | 5 | valproic_other2__5   | Abnormal PDR                       | 6 | valproic_other2__6 | Abnormal sleep features |
| 1   | valproic_other2__1                                                                                | Burst suppression                                                     |                                                                                                                                                                                                                                                                                                                                                                                                                                                                                                                                      |   |                      |                   |    |                      |                         |   |                      |               |   |                      |                               |   |                      |                                    |   |                    |                         |
| 2   | valproic_other2__2                                                                                | Generalized slowing                                                   |                                                                                                                                                                                                                                                                                                                                                                                                                                                                                                                                      |   |                      |                   |    |                      |                         |   |                      |               |   |                      |                               |   |                      |                                    |   |                    |                         |
| 3   | valproic_other2__3                                                                                | Focal slowing                                                         |                                                                                                                                                                                                                                                                                                                                                                                                                                                                                                                                      |   |                      |                   |    |                      |                         |   |                      |               |   |                      |                               |   |                      |                                    |   |                    |                         |
| 4   | valproic_other2__4                                                                                | Normal PDR and sleep features                                         |                                                                                                                                                                                                                                                                                                                                                                                                                                                                                                                                      |   |                      |                   |    |                      |                         |   |                      |               |   |                      |                               |   |                      |                                    |   |                    |                         |
| 5   | valproic_other2__5                                                                                | Abnormal PDR                                                          |                                                                                                                                                                                                                                                                                                                                                                                                                                                                                                                                      |   |                      |                   |    |                      |                         |   |                      |               |   |                      |                               |   |                      |                                    |   |                    |                         |
| 6   | valproic_other2__6                                                                                | Abnormal sleep features                                               |                                                                                                                                                                                                                                                                                                                                                                                                                                                                                                                                      |   |                      |                   |    |                      |                         |   |                      |               |   |                      |                               |   |                      |                                    |   |                    |                         |
| 207 | <p>[ <b>valproic_other3</b> ]</p> <p>Show the field ONLY if:<br/>[valproic_feature2(4)] = '1'</p> | <p>If other, please add any relevant notes:</p>                       | <p>notes</p>                                                                                                                                                                                                                                                                                                                                                                                                                                                                                                                         |   |                      |                   |    |                      |                         |   |                      |               |   |                      |                               |   |                      |                                    |   |                    |                         |



|     |                                                                                                                                     |                                                                          |                                                                                                                                                                                                                                                                                                                                                                                                                                                                         |   |                        |                |                                                                |                        |                         |   |                        |       |             |                        |             |   |                                   |                                    |               |
|-----|-------------------------------------------------------------------------------------------------------------------------------------|--------------------------------------------------------------------------|-------------------------------------------------------------------------------------------------------------------------------------------------------------------------------------------------------------------------------------------------------------------------------------------------------------------------------------------------------------------------------------------------------------------------------------------------------------------------|---|------------------------|----------------|----------------------------------------------------------------|------------------------|-------------------------|---|------------------------|-------|-------------|------------------------|-------------|---|-----------------------------------|------------------------------------|---------------|
| 208 | <p>[ valproic_interictal2 ]</p> <p>Show the field ONLY if:<br/>[valproic_feature2(4)] = '1' or<br/>[valproic_feature2(6)] = '1'</p> | Do any of the following interictal activities apply?                     | <p>radio</p> <table border="1"> <tr> <td>0</td> <td>None</td> </tr> <tr> <td>1</td> <td>Multifocal (3 or more foci, independent from both hemispheres)</td> </tr> <tr> <td>3</td> <td>Single focus</td> </tr> <tr> <td>4</td> <td>Two foci only</td> </tr> <tr> <td>5</td> <td>Hemispheric</td> </tr> <tr> <td>6</td> <td>Generalized</td> </tr> <tr> <td>7</td> <td>Generalized plus focal/multifocal</td> </tr> <tr> <td>9</td> <td>Not available</td> </tr> </table> | 0 | None                   | 1              | Multifocal (3 or more foci, independent from both hemispheres) | 3                      | Single focus            | 4 | Two foci only          | 5     | Hemispheric | 6                      | Generalized | 7 | Generalized plus focal/multifocal | 9                                  | Not available |
| 0   | None                                                                                                                                |                                                                          |                                                                                                                                                                                                                                                                                                                                                                                                                                                                         |   |                        |                |                                                                |                        |                         |   |                        |       |             |                        |             |   |                                   |                                    |               |
| 1   | Multifocal (3 or more foci, independent from both hemispheres)                                                                      |                                                                          |                                                                                                                                                                                                                                                                                                                                                                                                                                                                         |   |                        |                |                                                                |                        |                         |   |                        |       |             |                        |             |   |                                   |                                    |               |
| 3   | Single focus                                                                                                                        |                                                                          |                                                                                                                                                                                                                                                                                                                                                                                                                                                                         |   |                        |                |                                                                |                        |                         |   |                        |       |             |                        |             |   |                                   |                                    |               |
| 4   | Two foci only                                                                                                                       |                                                                          |                                                                                                                                                                                                                                                                                                                                                                                                                                                                         |   |                        |                |                                                                |                        |                         |   |                        |       |             |                        |             |   |                                   |                                    |               |
| 5   | Hemispheric                                                                                                                         |                                                                          |                                                                                                                                                                                                                                                                                                                                                                                                                                                                         |   |                        |                |                                                                |                        |                         |   |                        |       |             |                        |             |   |                                   |                                    |               |
| 6   | Generalized                                                                                                                         |                                                                          |                                                                                                                                                                                                                                                                                                                                                                                                                                                                         |   |                        |                |                                                                |                        |                         |   |                        |       |             |                        |             |   |                                   |                                    |               |
| 7   | Generalized plus focal/multifocal                                                                                                   |                                                                          |                                                                                                                                                                                                                                                                                                                                                                                                                                                                         |   |                        |                |                                                                |                        |                         |   |                        |       |             |                        |             |   |                                   |                                    |               |
| 9   | Not available                                                                                                                       |                                                                          |                                                                                                                                                                                                                                                                                                                                                                                                                                                                         |   |                        |                |                                                                |                        |                         |   |                        |       |             |                        |             |   |                                   |                                    |               |
| 209 | <p>[ rufinamide_eeg2 ]</p> <p>Show the field ONLY if:<br/>[resp_med2(4)] = '1'</p>                                                  | Was there an EEG after treatment with rufinamide?                        | <p>radio</p> <table border="1"> <tr> <td>1</td> <td>Yes</td> </tr> <tr> <td>2</td> <td>No</td> </tr> <tr> <td>9</td> <td>Unknown</td> </tr> </table>                                                                                                                                                                                                                                                                                                                    | 1 | Yes                    | 2              | No                                                             | 9                      | Unknown                 |   |                        |       |             |                        |             |   |                                   |                                    |               |
| 1   | Yes                                                                                                                                 |                                                                          |                                                                                                                                                                                                                                                                                                                                                                                                                                                                         |   |                        |                |                                                                |                        |                         |   |                        |       |             |                        |             |   |                                   |                                    |               |
| 2   | No                                                                                                                                  |                                                                          |                                                                                                                                                                                                                                                                                                                                                                                                                                                                         |   |                        |                |                                                                |                        |                         |   |                        |       |             |                        |             |   |                                   |                                    |               |
| 9   | Unknown                                                                                                                             |                                                                          |                                                                                                                                                                                                                                                                                                                                                                                                                                                                         |   |                        |                |                                                                |                        |                         |   |                        |       |             |                        |             |   |                                   |                                    |               |
| 210 | <p>[ rufinamide_feature2 ]</p> <p>Show the field ONLY if:<br/>[rufinamide_eeg2] = '1'</p>                                           | <p>If yes, check all that apply:</p> <p><i>select all that apply</i></p> | <p>checkbox</p> <table border="1"> <tr> <td>2</td> <td>rufinamide_feature2__2</td> <td>Hypsarrhythmia</td> </tr> <tr> <td>3</td> <td>rufinamide_feature2__3</td> <td>Modified hypsarrhythmia</td> </tr> <tr> <td>4</td> <td>rufinamide_feature2__4</td> <td>Other</td> </tr> <tr> <td>5</td> <td>rufinamide_feature2__5</td> <td>Normal</td> </tr> <tr> <td>6</td> <td>rufinamide_feature2__6</td> <td>Any abnormality [NISC cohort only]</td> </tr> </table>           | 2 | rufinamide_feature2__2 | Hypsarrhythmia | 3                                                              | rufinamide_feature2__3 | Modified hypsarrhythmia | 4 | rufinamide_feature2__4 | Other | 5           | rufinamide_feature2__5 | Normal      | 6 | rufinamide_feature2__6            | Any abnormality [NISC cohort only] |               |
| 2   | rufinamide_feature2__2                                                                                                              | Hypsarrhythmia                                                           |                                                                                                                                                                                                                                                                                                                                                                                                                                                                         |   |                        |                |                                                                |                        |                         |   |                        |       |             |                        |             |   |                                   |                                    |               |
| 3   | rufinamide_feature2__3                                                                                                              | Modified hypsarrhythmia                                                  |                                                                                                                                                                                                                                                                                                                                                                                                                                                                         |   |                        |                |                                                                |                        |                         |   |                        |       |             |                        |             |   |                                   |                                    |               |
| 4   | rufinamide_feature2__4                                                                                                              | Other                                                                    |                                                                                                                                                                                                                                                                                                                                                                                                                                                                         |   |                        |                |                                                                |                        |                         |   |                        |       |             |                        |             |   |                                   |                                    |               |
| 5   | rufinamide_feature2__5                                                                                                              | Normal                                                                   |                                                                                                                                                                                                                                                                                                                                                                                                                                                                         |   |                        |                |                                                                |                        |                         |   |                        |       |             |                        |             |   |                                   |                                    |               |
| 6   | rufinamide_feature2__6                                                                                                              | Any abnormality [NISC cohort only]                                       |                                                                                                                                                                                                                                                                                                                                                                                                                                                                         |   |                        |                |                                                                |                        |                         |   |                        |       |             |                        |             |   |                                   |                                    |               |

|     |                                                                                                                                                  |                                                             |                                                                                                                                                                                                                                                                                                                                                                                                                                                                                                                                                                                                                                                                                                                                                                                                                                                                                                                                                                                                                                                                                                              |   |                      |                   |                                                                |                      |                     |   |                      |               |             |                      |                               |   |                                   |              |               |                      |                         |
|-----|--------------------------------------------------------------------------------------------------------------------------------------------------|-------------------------------------------------------------|--------------------------------------------------------------------------------------------------------------------------------------------------------------------------------------------------------------------------------------------------------------------------------------------------------------------------------------------------------------------------------------------------------------------------------------------------------------------------------------------------------------------------------------------------------------------------------------------------------------------------------------------------------------------------------------------------------------------------------------------------------------------------------------------------------------------------------------------------------------------------------------------------------------------------------------------------------------------------------------------------------------------------------------------------------------------------------------------------------------|---|----------------------|-------------------|----------------------------------------------------------------|----------------------|---------------------|---|----------------------|---------------|-------------|----------------------|-------------------------------|---|-----------------------------------|--------------|---------------|----------------------|-------------------------|
| 211 | <p>[ <b>rufinamide_other2</b> ]</p> <p>Show the field ONLY if:<br/>[rufinamide_feature2(4)] = '1'</p>                                            | <p>If other, please check all that apply:</p>               | <p>checkbox</p> <table border="1"> <tr> <td data-bbox="1354 123 1388 175">1</td> <td data-bbox="1388 123 1688 175">rufinamide_other2__1</td> <td data-bbox="1688 123 1997 175">Burst suppression</td> </tr> <tr> <td data-bbox="1354 175 1388 227">2</td> <td data-bbox="1388 175 1688 227">rufinamide_other2__2</td> <td data-bbox="1688 175 1997 227">Generalized slowing</td> </tr> <tr> <td data-bbox="1354 227 1388 279">3</td> <td data-bbox="1388 227 1688 279">rufinamide_other2__3</td> <td data-bbox="1688 227 1997 279">Focal slowing</td> </tr> <tr> <td data-bbox="1354 279 1388 370">4</td> <td data-bbox="1388 279 1688 370">rufinamide_other2__4</td> <td data-bbox="1688 279 1997 370">Normal PDR and sleep features</td> </tr> <tr> <td data-bbox="1354 370 1388 422">5</td> <td data-bbox="1388 370 1688 422">rufinamide_other2__5</td> <td data-bbox="1688 370 1997 422">Abnormal PDR</td> </tr> <tr> <td data-bbox="1354 422 1388 513">6</td> <td data-bbox="1388 422 1688 513">rufinamide_other2__6</td> <td data-bbox="1688 422 1997 513">Abnormal sleep features</td> </tr> </table> | 1 | rufinamide_other2__1 | Burst suppression | 2                                                              | rufinamide_other2__2 | Generalized slowing | 3 | rufinamide_other2__3 | Focal slowing | 4           | rufinamide_other2__4 | Normal PDR and sleep features | 5 | rufinamide_other2__5              | Abnormal PDR | 6             | rufinamide_other2__6 | Abnormal sleep features |
| 1   | rufinamide_other2__1                                                                                                                             | Burst suppression                                           |                                                                                                                                                                                                                                                                                                                                                                                                                                                                                                                                                                                                                                                                                                                                                                                                                                                                                                                                                                                                                                                                                                              |   |                      |                   |                                                                |                      |                     |   |                      |               |             |                      |                               |   |                                   |              |               |                      |                         |
| 2   | rufinamide_other2__2                                                                                                                             | Generalized slowing                                         |                                                                                                                                                                                                                                                                                                                                                                                                                                                                                                                                                                                                                                                                                                                                                                                                                                                                                                                                                                                                                                                                                                              |   |                      |                   |                                                                |                      |                     |   |                      |               |             |                      |                               |   |                                   |              |               |                      |                         |
| 3   | rufinamide_other2__3                                                                                                                             | Focal slowing                                               |                                                                                                                                                                                                                                                                                                                                                                                                                                                                                                                                                                                                                                                                                                                                                                                                                                                                                                                                                                                                                                                                                                              |   |                      |                   |                                                                |                      |                     |   |                      |               |             |                      |                               |   |                                   |              |               |                      |                         |
| 4   | rufinamide_other2__4                                                                                                                             | Normal PDR and sleep features                               |                                                                                                                                                                                                                                                                                                                                                                                                                                                                                                                                                                                                                                                                                                                                                                                                                                                                                                                                                                                                                                                                                                              |   |                      |                   |                                                                |                      |                     |   |                      |               |             |                      |                               |   |                                   |              |               |                      |                         |
| 5   | rufinamide_other2__5                                                                                                                             | Abnormal PDR                                                |                                                                                                                                                                                                                                                                                                                                                                                                                                                                                                                                                                                                                                                                                                                                                                                                                                                                                                                                                                                                                                                                                                              |   |                      |                   |                                                                |                      |                     |   |                      |               |             |                      |                               |   |                                   |              |               |                      |                         |
| 6   | rufinamide_other2__6                                                                                                                             | Abnormal sleep features                                     |                                                                                                                                                                                                                                                                                                                                                                                                                                                                                                                                                                                                                                                                                                                                                                                                                                                                                                                                                                                                                                                                                                              |   |                      |                   |                                                                |                      |                     |   |                      |               |             |                      |                               |   |                                   |              |               |                      |                         |
| 212 | <p>[ <b>rufinamide_other3</b> ]</p> <p>Show the field ONLY if:<br/>[rufinamide_feature2(4)] = '1'</p>                                            | <p>If other, please add any relevant notes:</p>             | <p>notes</p>                                                                                                                                                                                                                                                                                                                                                                                                                                                                                                                                                                                                                                                                                                                                                                                                                                                                                                                                                                                                                                                                                                 |   |                      |                   |                                                                |                      |                     |   |                      |               |             |                      |                               |   |                                   |              |               |                      |                         |
| 213 | <p>[ <b>rufinamide_interictal2</b> ]</p> <p>Show the field ONLY if:<br/>[rufinamide_feature2(4)] = '1'<br/>or [rufinamide_feature2(6)] = '1'</p> | <p>Do any of the following interictal activities apply?</p> | <p>radio</p> <table border="1"> <tr> <td data-bbox="1354 712 1388 764">0</td> <td data-bbox="1388 712 1997 764">None</td> </tr> <tr> <td data-bbox="1354 764 1388 855">1</td> <td data-bbox="1388 764 1997 855">Multifocal (3 or more foci, independent from both hemispheres)</td> </tr> <tr> <td data-bbox="1354 855 1388 907">3</td> <td data-bbox="1388 855 1997 907">Single focus</td> </tr> <tr> <td data-bbox="1354 907 1388 959">4</td> <td data-bbox="1388 907 1997 959">Two foci only</td> </tr> <tr> <td data-bbox="1354 959 1388 1011">5</td> <td data-bbox="1388 959 1997 1011">Hemispheric</td> </tr> <tr> <td data-bbox="1354 1011 1388 1063">6</td> <td data-bbox="1388 1011 1997 1063">Generalized</td> </tr> <tr> <td data-bbox="1354 1063 1388 1115">7</td> <td data-bbox="1388 1063 1997 1115">Generalized plus focal/multifocal</td> </tr> <tr> <td data-bbox="1354 1115 1388 1167">9</td> <td data-bbox="1388 1115 1997 1167">Not available</td> </tr> </table>                                                                                                                        | 0 | None                 | 1                 | Multifocal (3 or more foci, independent from both hemispheres) | 3                    | Single focus        | 4 | Two foci only        | 5             | Hemispheric | 6                    | Generalized                   | 7 | Generalized plus focal/multifocal | 9            | Not available |                      |                         |
| 0   | None                                                                                                                                             |                                                             |                                                                                                                                                                                                                                                                                                                                                                                                                                                                                                                                                                                                                                                                                                                                                                                                                                                                                                                                                                                                                                                                                                              |   |                      |                   |                                                                |                      |                     |   |                      |               |             |                      |                               |   |                                   |              |               |                      |                         |
| 1   | Multifocal (3 or more foci, independent from both hemispheres)                                                                                   |                                                             |                                                                                                                                                                                                                                                                                                                                                                                                                                                                                                                                                                                                                                                                                                                                                                                                                                                                                                                                                                                                                                                                                                              |   |                      |                   |                                                                |                      |                     |   |                      |               |             |                      |                               |   |                                   |              |               |                      |                         |
| 3   | Single focus                                                                                                                                     |                                                             |                                                                                                                                                                                                                                                                                                                                                                                                                                                                                                                                                                                                                                                                                                                                                                                                                                                                                                                                                                                                                                                                                                              |   |                      |                   |                                                                |                      |                     |   |                      |               |             |                      |                               |   |                                   |              |               |                      |                         |
| 4   | Two foci only                                                                                                                                    |                                                             |                                                                                                                                                                                                                                                                                                                                                                                                                                                                                                                                                                                                                                                                                                                                                                                                                                                                                                                                                                                                                                                                                                              |   |                      |                   |                                                                |                      |                     |   |                      |               |             |                      |                               |   |                                   |              |               |                      |                         |
| 5   | Hemispheric                                                                                                                                      |                                                             |                                                                                                                                                                                                                                                                                                                                                                                                                                                                                                                                                                                                                                                                                                                                                                                                                                                                                                                                                                                                                                                                                                              |   |                      |                   |                                                                |                      |                     |   |                      |               |             |                      |                               |   |                                   |              |               |                      |                         |
| 6   | Generalized                                                                                                                                      |                                                             |                                                                                                                                                                                                                                                                                                                                                                                                                                                                                                                                                                                                                                                                                                                                                                                                                                                                                                                                                                                                                                                                                                              |   |                      |                   |                                                                |                      |                     |   |                      |               |             |                      |                               |   |                                   |              |               |                      |                         |
| 7   | Generalized plus focal/multifocal                                                                                                                |                                                             |                                                                                                                                                                                                                                                                                                                                                                                                                                                                                                                                                                                                                                                                                                                                                                                                                                                                                                                                                                                                                                                                                                              |   |                      |                   |                                                                |                      |                     |   |                      |               |             |                      |                               |   |                                   |              |               |                      |                         |
| 9   | Not available                                                                                                                                    |                                                             |                                                                                                                                                                                                                                                                                                                                                                                                                                                                                                                                                                                                                                                                                                                                                                                                                                                                                                                                                                                                                                                                                                              |   |                      |                   |                                                                |                      |                     |   |                      |               |             |                      |                               |   |                                   |              |               |                      |                         |
| 214 | <p>[ <b>levetiracetam_eeg2</b> ]</p> <p>Show the field ONLY if:<br/>[resp_med2(5)] = '1'</p>                                                     | <p>Was there an EEG after treatment with levetiracetam?</p> | <p>radio</p> <table border="1"> <tr> <td data-bbox="1354 1224 1388 1276">1</td> <td data-bbox="1388 1224 1526 1276">Yes</td> </tr> <tr> <td data-bbox="1354 1276 1388 1328">2</td> <td data-bbox="1388 1276 1526 1328">No</td> </tr> <tr> <td data-bbox="1354 1328 1388 1380">9</td> <td data-bbox="1388 1328 1526 1380">Unknown</td> </tr> </table>                                                                                                                                                                                                                                                                                                                                                                                                                                                                                                                                                                                                                                                                                                                                                         | 1 | Yes                  | 2                 | No                                                             | 9                    | Unknown             |   |                      |               |             |                      |                               |   |                                   |              |               |                      |                         |
| 1   | Yes                                                                                                                                              |                                                             |                                                                                                                                                                                                                                                                                                                                                                                                                                                                                                                                                                                                                                                                                                                                                                                                                                                                                                                                                                                                                                                                                                              |   |                      |                   |                                                                |                      |                     |   |                      |               |             |                      |                               |   |                                   |              |               |                      |                         |
| 2   | No                                                                                                                                               |                                                             |                                                                                                                                                                                                                                                                                                                                                                                                                                                                                                                                                                                                                                                                                                                                                                                                                                                                                                                                                                                                                                                                                                              |   |                      |                   |                                                                |                      |                     |   |                      |               |             |                      |                               |   |                                   |              |               |                      |                         |
| 9   | Unknown                                                                                                                                          |                                                             |                                                                                                                                                                                                                                                                                                                                                                                                                                                                                                                                                                                                                                                                                                                                                                                                                                                                                                                                                                                                                                                                                                              |   |                      |                   |                                                                |                      |                     |   |                      |               |             |                      |                               |   |                                   |              |               |                      |                         |

|     |                                                                                                             |                                                                       |                                                                                                                                                                                                                                                                                                                                                                                                                                                                                                                                                                                                                                                                                                                                                                                                                                                                                                                                                                                                                                                                                                                                |   |                           |                   |   |                           |                         |   |                           |               |   |                           |                               |   |                           |                                    |   |                         |                         |
|-----|-------------------------------------------------------------------------------------------------------------|-----------------------------------------------------------------------|--------------------------------------------------------------------------------------------------------------------------------------------------------------------------------------------------------------------------------------------------------------------------------------------------------------------------------------------------------------------------------------------------------------------------------------------------------------------------------------------------------------------------------------------------------------------------------------------------------------------------------------------------------------------------------------------------------------------------------------------------------------------------------------------------------------------------------------------------------------------------------------------------------------------------------------------------------------------------------------------------------------------------------------------------------------------------------------------------------------------------------|---|---------------------------|-------------------|---|---------------------------|-------------------------|---|---------------------------|---------------|---|---------------------------|-------------------------------|---|---------------------------|------------------------------------|---|-------------------------|-------------------------|
| 215 | <p>[ <b>levetiracetam_feature2</b> ]</p> <p>Show the field ONLY if:<br/>[levetiracetam_eeg2] = '1'</p>      | <p>If yes, check all that apply:<br/><i>select all that apply</i></p> | <p>checkbox</p> <table border="1"> <tr> <td data-bbox="1356 123 1388 175">2</td> <td data-bbox="1388 123 1734 175">levetiracetam_feature2__2</td> <td data-bbox="1734 123 1992 175">Hypsarrhythmia</td> </tr> <tr> <td data-bbox="1356 175 1388 266">3</td> <td data-bbox="1388 175 1734 266">levetiracetam_feature2__3</td> <td data-bbox="1734 175 1992 266">Modified hypsarrhythmia</td> </tr> <tr> <td data-bbox="1356 266 1388 318">4</td> <td data-bbox="1388 266 1734 318">levetiracetam_feature2__4</td> <td data-bbox="1734 266 1992 318">Other</td> </tr> <tr> <td data-bbox="1356 318 1388 370">5</td> <td data-bbox="1388 318 1734 370">levetiracetam_feature2__5</td> <td data-bbox="1734 318 1992 370">Normal</td> </tr> <tr> <td data-bbox="1356 370 1388 461">6</td> <td data-bbox="1388 370 1734 461">levetiracetam_feature2__6</td> <td data-bbox="1734 370 1992 461">Any abnormality [NISC cohort only]</td> </tr> </table>                                                                                                                                                                                 | 2 | levetiracetam_feature2__2 | Hypsarrhythmia    | 3 | levetiracetam_feature2__3 | Modified hypsarrhythmia | 4 | levetiracetam_feature2__4 | Other         | 5 | levetiracetam_feature2__5 | Normal                        | 6 | levetiracetam_feature2__6 | Any abnormality [NISC cohort only] |   |                         |                         |
| 2   | levetiracetam_feature2__2                                                                                   | Hypsarrhythmia                                                        |                                                                                                                                                                                                                                                                                                                                                                                                                                                                                                                                                                                                                                                                                                                                                                                                                                                                                                                                                                                                                                                                                                                                |   |                           |                   |   |                           |                         |   |                           |               |   |                           |                               |   |                           |                                    |   |                         |                         |
| 3   | levetiracetam_feature2__3                                                                                   | Modified hypsarrhythmia                                               |                                                                                                                                                                                                                                                                                                                                                                                                                                                                                                                                                                                                                                                                                                                                                                                                                                                                                                                                                                                                                                                                                                                                |   |                           |                   |   |                           |                         |   |                           |               |   |                           |                               |   |                           |                                    |   |                         |                         |
| 4   | levetiracetam_feature2__4                                                                                   | Other                                                                 |                                                                                                                                                                                                                                                                                                                                                                                                                                                                                                                                                                                                                                                                                                                                                                                                                                                                                                                                                                                                                                                                                                                                |   |                           |                   |   |                           |                         |   |                           |               |   |                           |                               |   |                           |                                    |   |                         |                         |
| 5   | levetiracetam_feature2__5                                                                                   | Normal                                                                |                                                                                                                                                                                                                                                                                                                                                                                                                                                                                                                                                                                                                                                                                                                                                                                                                                                                                                                                                                                                                                                                                                                                |   |                           |                   |   |                           |                         |   |                           |               |   |                           |                               |   |                           |                                    |   |                         |                         |
| 6   | levetiracetam_feature2__6                                                                                   | Any abnormality [NISC cohort only]                                    |                                                                                                                                                                                                                                                                                                                                                                                                                                                                                                                                                                                                                                                                                                                                                                                                                                                                                                                                                                                                                                                                                                                                |   |                           |                   |   |                           |                         |   |                           |               |   |                           |                               |   |                           |                                    |   |                         |                         |
| 216 | <p>[ <b>levetiracetam_other2</b> ]</p> <p>Show the field ONLY if:<br/>[levetiracetam_feature2(4)] = '1'</p> | <p>If other, please check all that apply:</p>                         | <p>checkbox</p> <table border="1"> <tr> <td data-bbox="1356 513 1388 565">1</td> <td data-bbox="1388 513 1713 565">levetiracetam_other2__1</td> <td data-bbox="1713 513 1992 565">Burst suppression</td> </tr> <tr> <td data-bbox="1356 565 1388 617">2</td> <td data-bbox="1388 565 1713 617">levetiracetam_other2__2</td> <td data-bbox="1713 565 1992 617">Generalized slowing</td> </tr> <tr> <td data-bbox="1356 617 1388 669">3</td> <td data-bbox="1388 617 1713 669">levetiracetam_other2__3</td> <td data-bbox="1713 617 1992 669">Focal slowing</td> </tr> <tr> <td data-bbox="1356 669 1388 760">4</td> <td data-bbox="1388 669 1713 760">levetiracetam_other2__4</td> <td data-bbox="1713 669 1992 760">Normal PDR and sleep features</td> </tr> <tr> <td data-bbox="1356 760 1388 812">5</td> <td data-bbox="1388 760 1713 812">levetiracetam_other2__5</td> <td data-bbox="1713 760 1992 812">Abnormal PDR</td> </tr> <tr> <td data-bbox="1356 812 1388 902">6</td> <td data-bbox="1388 812 1713 902">levetiracetam_other2__6</td> <td data-bbox="1713 812 1992 902">Abnormal sleep features</td> </tr> </table> | 1 | levetiracetam_other2__1   | Burst suppression | 2 | levetiracetam_other2__2   | Generalized slowing     | 3 | levetiracetam_other2__3   | Focal slowing | 4 | levetiracetam_other2__4   | Normal PDR and sleep features | 5 | levetiracetam_other2__5   | Abnormal PDR                       | 6 | levetiracetam_other2__6 | Abnormal sleep features |
| 1   | levetiracetam_other2__1                                                                                     | Burst suppression                                                     |                                                                                                                                                                                                                                                                                                                                                                                                                                                                                                                                                                                                                                                                                                                                                                                                                                                                                                                                                                                                                                                                                                                                |   |                           |                   |   |                           |                         |   |                           |               |   |                           |                               |   |                           |                                    |   |                         |                         |
| 2   | levetiracetam_other2__2                                                                                     | Generalized slowing                                                   |                                                                                                                                                                                                                                                                                                                                                                                                                                                                                                                                                                                                                                                                                                                                                                                                                                                                                                                                                                                                                                                                                                                                |   |                           |                   |   |                           |                         |   |                           |               |   |                           |                               |   |                           |                                    |   |                         |                         |
| 3   | levetiracetam_other2__3                                                                                     | Focal slowing                                                         |                                                                                                                                                                                                                                                                                                                                                                                                                                                                                                                                                                                                                                                                                                                                                                                                                                                                                                                                                                                                                                                                                                                                |   |                           |                   |   |                           |                         |   |                           |               |   |                           |                               |   |                           |                                    |   |                         |                         |
| 4   | levetiracetam_other2__4                                                                                     | Normal PDR and sleep features                                         |                                                                                                                                                                                                                                                                                                                                                                                                                                                                                                                                                                                                                                                                                                                                                                                                                                                                                                                                                                                                                                                                                                                                |   |                           |                   |   |                           |                         |   |                           |               |   |                           |                               |   |                           |                                    |   |                         |                         |
| 5   | levetiracetam_other2__5                                                                                     | Abnormal PDR                                                          |                                                                                                                                                                                                                                                                                                                                                                                                                                                                                                                                                                                                                                                                                                                                                                                                                                                                                                                                                                                                                                                                                                                                |   |                           |                   |   |                           |                         |   |                           |               |   |                           |                               |   |                           |                                    |   |                         |                         |
| 6   | levetiracetam_other2__6                                                                                     | Abnormal sleep features                                               |                                                                                                                                                                                                                                                                                                                                                                                                                                                                                                                                                                                                                                                                                                                                                                                                                                                                                                                                                                                                                                                                                                                                |   |                           |                   |   |                           |                         |   |                           |               |   |                           |                               |   |                           |                                    |   |                         |                         |
| 217 | <p>[ <b>levetiracetam_other3</b> ]</p> <p>Show the field ONLY if:<br/>[levetiracetam_feature2(4)] = '1'</p> | <p>If other, please add any relevant notes:</p>                       | <p>notes</p>                                                                                                                                                                                                                                                                                                                                                                                                                                                                                                                                                                                                                                                                                                                                                                                                                                                                                                                                                                                                                                                                                                                   |   |                           |                   |   |                           |                         |   |                           |               |   |                           |                               |   |                           |                                    |   |                         |                         |

|     |                                                                                                                                                                |                                                                        |                                                                                                                                                                                                                                                                                                                                                                                                                                                                         |   |                   |                |                                                                |                   |                         |   |                   |       |             |                   |             |   |                                   |                                    |               |
|-----|----------------------------------------------------------------------------------------------------------------------------------------------------------------|------------------------------------------------------------------------|-------------------------------------------------------------------------------------------------------------------------------------------------------------------------------------------------------------------------------------------------------------------------------------------------------------------------------------------------------------------------------------------------------------------------------------------------------------------------|---|-------------------|----------------|----------------------------------------------------------------|-------------------|-------------------------|---|-------------------|-------|-------------|-------------------|-------------|---|-----------------------------------|------------------------------------|---------------|
| 218 | <p>[ <b>levetiracetam_interictal2</b> ]</p> <p>Show the field ONLY if:<br/>         [levetiracetam_feature2(4)] = '1' or [levetiracetam_feature2(6)] = '1'</p> | <p>Do any of the following interictal activities apply?</p>            | <p>radio</p> <table border="1"> <tr> <td>0</td> <td>None</td> </tr> <tr> <td>1</td> <td>Multifocal (3 or more foci, independent from both hemispheres)</td> </tr> <tr> <td>3</td> <td>Single focus</td> </tr> <tr> <td>4</td> <td>Two foci only</td> </tr> <tr> <td>5</td> <td>Hemispheric</td> </tr> <tr> <td>6</td> <td>Generalized</td> </tr> <tr> <td>7</td> <td>Generalized plus focal/multifocal</td> </tr> <tr> <td>9</td> <td>Not available</td> </tr> </table> | 0 | None              | 1              | Multifocal (3 or more foci, independent from both hemispheres) | 3                 | Single focus            | 4 | Two foci only     | 5     | Hemispheric | 6                 | Generalized | 7 | Generalized plus focal/multifocal | 9                                  | Not available |
| 0   | None                                                                                                                                                           |                                                                        |                                                                                                                                                                                                                                                                                                                                                                                                                                                                         |   |                   |                |                                                                |                   |                         |   |                   |       |             |                   |             |   |                                   |                                    |               |
| 1   | Multifocal (3 or more foci, independent from both hemispheres)                                                                                                 |                                                                        |                                                                                                                                                                                                                                                                                                                                                                                                                                                                         |   |                   |                |                                                                |                   |                         |   |                   |       |             |                   |             |   |                                   |                                    |               |
| 3   | Single focus                                                                                                                                                   |                                                                        |                                                                                                                                                                                                                                                                                                                                                                                                                                                                         |   |                   |                |                                                                |                   |                         |   |                   |       |             |                   |             |   |                                   |                                    |               |
| 4   | Two foci only                                                                                                                                                  |                                                                        |                                                                                                                                                                                                                                                                                                                                                                                                                                                                         |   |                   |                |                                                                |                   |                         |   |                   |       |             |                   |             |   |                                   |                                    |               |
| 5   | Hemispheric                                                                                                                                                    |                                                                        |                                                                                                                                                                                                                                                                                                                                                                                                                                                                         |   |                   |                |                                                                |                   |                         |   |                   |       |             |                   |             |   |                                   |                                    |               |
| 6   | Generalized                                                                                                                                                    |                                                                        |                                                                                                                                                                                                                                                                                                                                                                                                                                                                         |   |                   |                |                                                                |                   |                         |   |                   |       |             |                   |             |   |                                   |                                    |               |
| 7   | Generalized plus focal/multifocal                                                                                                                              |                                                                        |                                                                                                                                                                                                                                                                                                                                                                                                                                                                         |   |                   |                |                                                                |                   |                         |   |                   |       |             |                   |             |   |                                   |                                    |               |
| 9   | Not available                                                                                                                                                  |                                                                        |                                                                                                                                                                                                                                                                                                                                                                                                                                                                         |   |                   |                |                                                                |                   |                         |   |                   |       |             |                   |             |   |                                   |                                    |               |
| 219 | <p>[ <b>med_other2</b> ]</p> <p>Show the field ONLY if:<br/>         [resp_med2(6)] = '1'</p>                                                                  | <p>If other, please explain:</p>                                       | <p>text</p>                                                                                                                                                                                                                                                                                                                                                                                                                                                             |   |                   |                |                                                                |                   |                         |   |                   |       |             |                   |             |   |                                   |                                    |               |
| 220 | <p>[ <b>other_eeg2</b> ]</p> <p>Show the field ONLY if:<br/>         [resp_med2(6)] = '1'</p>                                                                  | <p>Was there an EEG after treatment with the medication listed?</p>    | <p>radio</p> <table border="1"> <tr> <td>1</td> <td>Yes</td> </tr> <tr> <td>2</td> <td>No</td> </tr> <tr> <td>9</td> <td>Unknown</td> </tr> </table>                                                                                                                                                                                                                                                                                                                    | 1 | Yes               | 2              | No                                                             | 9                 | Unknown                 |   |                   |       |             |                   |             |   |                                   |                                    |               |
| 1   | Yes                                                                                                                                                            |                                                                        |                                                                                                                                                                                                                                                                                                                                                                                                                                                                         |   |                   |                |                                                                |                   |                         |   |                   |       |             |                   |             |   |                                   |                                    |               |
| 2   | No                                                                                                                                                             |                                                                        |                                                                                                                                                                                                                                                                                                                                                                                                                                                                         |   |                   |                |                                                                |                   |                         |   |                   |       |             |                   |             |   |                                   |                                    |               |
| 9   | Unknown                                                                                                                                                        |                                                                        |                                                                                                                                                                                                                                                                                                                                                                                                                                                                         |   |                   |                |                                                                |                   |                         |   |                   |       |             |                   |             |   |                                   |                                    |               |
| 221 | <p>[ <b>other_feature2</b> ]</p> <p>Show the field ONLY if:<br/>         [other_eeg2] = '1'</p>                                                                | <p>If yes, check all that apply:<br/> <i>select all that apply</i></p> | <p>checkbox</p> <table border="1"> <tr> <td>2</td> <td>other_feature2__2</td> <td>Hypsarrhythmia</td> </tr> <tr> <td>3</td> <td>other_feature2__3</td> <td>Modified hypsarrhythmia</td> </tr> <tr> <td>4</td> <td>other_feature2__4</td> <td>Other</td> </tr> <tr> <td>5</td> <td>other_feature2__5</td> <td>Normal</td> </tr> <tr> <td>6</td> <td>other_feature2__6</td> <td>Any abnormality [NISC cohort only]</td> </tr> </table>                                    | 2 | other_feature2__2 | Hypsarrhythmia | 3                                                              | other_feature2__3 | Modified hypsarrhythmia | 4 | other_feature2__4 | Other | 5           | other_feature2__5 | Normal      | 6 | other_feature2__6                 | Any abnormality [NISC cohort only] |               |
| 2   | other_feature2__2                                                                                                                                              | Hypsarrhythmia                                                         |                                                                                                                                                                                                                                                                                                                                                                                                                                                                         |   |                   |                |                                                                |                   |                         |   |                   |       |             |                   |             |   |                                   |                                    |               |
| 3   | other_feature2__3                                                                                                                                              | Modified hypsarrhythmia                                                |                                                                                                                                                                                                                                                                                                                                                                                                                                                                         |   |                   |                |                                                                |                   |                         |   |                   |       |             |                   |             |   |                                   |                                    |               |
| 4   | other_feature2__4                                                                                                                                              | Other                                                                  |                                                                                                                                                                                                                                                                                                                                                                                                                                                                         |   |                   |                |                                                                |                   |                         |   |                   |       |             |                   |             |   |                                   |                                    |               |
| 5   | other_feature2__5                                                                                                                                              | Normal                                                                 |                                                                                                                                                                                                                                                                                                                                                                                                                                                                         |   |                   |                |                                                                |                   |                         |   |                   |       |             |                   |             |   |                                   |                                    |               |
| 6   | other_feature2__6                                                                                                                                              | Any abnormality [NISC cohort only]                                     |                                                                                                                                                                                                                                                                                                                                                                                                                                                                         |   |                   |                |                                                                |                   |                         |   |                   |       |             |                   |             |   |                                   |                                    |               |

|     |                                                                                                                                        |                                                                      |                                                                                                                                                                                                                                                                                                                                                                                                                                                                                                                    |   |                 |                   |                                                                |                 |                     |   |                 |               |             |                 |                               |   |                                   |              |               |                 |                         |
|-----|----------------------------------------------------------------------------------------------------------------------------------------|----------------------------------------------------------------------|--------------------------------------------------------------------------------------------------------------------------------------------------------------------------------------------------------------------------------------------------------------------------------------------------------------------------------------------------------------------------------------------------------------------------------------------------------------------------------------------------------------------|---|-----------------|-------------------|----------------------------------------------------------------|-----------------|---------------------|---|-----------------|---------------|-------------|-----------------|-------------------------------|---|-----------------------------------|--------------|---------------|-----------------|-------------------------|
| 222 | <p>[ <b>other_other2</b> ]</p> <p>Show the field ONLY if:<br/>[other_feature2(4)] = '1'</p>                                            | <p>If other, please check all that apply:</p>                        | <p>checkbox</p> <table border="1"> <tr> <td>1</td> <td>other_other2__1</td> <td>Burst suppression</td> </tr> <tr> <td>2</td> <td>other_other2__2</td> <td>Generalized slowing</td> </tr> <tr> <td>3</td> <td>other_other2__3</td> <td>Focal slowing</td> </tr> <tr> <td>4</td> <td>other_other2__4</td> <td>Normal PDR and sleep features</td> </tr> <tr> <td>5</td> <td>other_other2__5</td> <td>Abnormal PDR</td> </tr> <tr> <td>6</td> <td>other_other2__6</td> <td>Abnormal sleep features</td> </tr> </table> | 1 | other_other2__1 | Burst suppression | 2                                                              | other_other2__2 | Generalized slowing | 3 | other_other2__3 | Focal slowing | 4           | other_other2__4 | Normal PDR and sleep features | 5 | other_other2__5                   | Abnormal PDR | 6             | other_other2__6 | Abnormal sleep features |
| 1   | other_other2__1                                                                                                                        | Burst suppression                                                    |                                                                                                                                                                                                                                                                                                                                                                                                                                                                                                                    |   |                 |                   |                                                                |                 |                     |   |                 |               |             |                 |                               |   |                                   |              |               |                 |                         |
| 2   | other_other2__2                                                                                                                        | Generalized slowing                                                  |                                                                                                                                                                                                                                                                                                                                                                                                                                                                                                                    |   |                 |                   |                                                                |                 |                     |   |                 |               |             |                 |                               |   |                                   |              |               |                 |                         |
| 3   | other_other2__3                                                                                                                        | Focal slowing                                                        |                                                                                                                                                                                                                                                                                                                                                                                                                                                                                                                    |   |                 |                   |                                                                |                 |                     |   |                 |               |             |                 |                               |   |                                   |              |               |                 |                         |
| 4   | other_other2__4                                                                                                                        | Normal PDR and sleep features                                        |                                                                                                                                                                                                                                                                                                                                                                                                                                                                                                                    |   |                 |                   |                                                                |                 |                     |   |                 |               |             |                 |                               |   |                                   |              |               |                 |                         |
| 5   | other_other2__5                                                                                                                        | Abnormal PDR                                                         |                                                                                                                                                                                                                                                                                                                                                                                                                                                                                                                    |   |                 |                   |                                                                |                 |                     |   |                 |               |             |                 |                               |   |                                   |              |               |                 |                         |
| 6   | other_other2__6                                                                                                                        | Abnormal sleep features                                              |                                                                                                                                                                                                                                                                                                                                                                                                                                                                                                                    |   |                 |                   |                                                                |                 |                     |   |                 |               |             |                 |                               |   |                                   |              |               |                 |                         |
| 223 | <p>[ <b>other_other3</b> ]</p> <p>Show the field ONLY if:<br/>[other_feature2(4)] = '1'</p>                                            | <p>If other, please add any relevant notes:</p>                      | <p>notes</p>                                                                                                                                                                                                                                                                                                                                                                                                                                                                                                       |   |                 |                   |                                                                |                 |                     |   |                 |               |             |                 |                               |   |                                   |              |               |                 |                         |
| 224 | <p>[ <b>other_interictal2</b> ]</p> <p>Show the field ONLY if:<br/>[unknown_feature2(4)] = '1' o<br/>r [unknown_feature2(6)] = '1'</p> | <p>Do any of the following interictal activities apply?</p>          | <p>radio</p> <table border="1"> <tr> <td>0</td> <td>None</td> </tr> <tr> <td>1</td> <td>Multifocal (3 or more foci, independent from both hemispheres)</td> </tr> <tr> <td>3</td> <td>Single focus</td> </tr> <tr> <td>4</td> <td>Two foci only</td> </tr> <tr> <td>5</td> <td>Hemispheric</td> </tr> <tr> <td>6</td> <td>Generalized</td> </tr> <tr> <td>7</td> <td>Generalized plus focal/multifocal</td> </tr> <tr> <td>9</td> <td>Not available</td> </tr> </table>                                            | 0 | None            | 1                 | Multifocal (3 or more foci, independent from both hemispheres) | 3               | Single focus        | 4 | Two foci only   | 5             | Hemispheric | 6               | Generalized                   | 7 | Generalized plus focal/multifocal | 9            | Not available |                 |                         |
| 0   | None                                                                                                                                   |                                                                      |                                                                                                                                                                                                                                                                                                                                                                                                                                                                                                                    |   |                 |                   |                                                                |                 |                     |   |                 |               |             |                 |                               |   |                                   |              |               |                 |                         |
| 1   | Multifocal (3 or more foci, independent from both hemispheres)                                                                         |                                                                      |                                                                                                                                                                                                                                                                                                                                                                                                                                                                                                                    |   |                 |                   |                                                                |                 |                     |   |                 |               |             |                 |                               |   |                                   |              |               |                 |                         |
| 3   | Single focus                                                                                                                           |                                                                      |                                                                                                                                                                                                                                                                                                                                                                                                                                                                                                                    |   |                 |                   |                                                                |                 |                     |   |                 |               |             |                 |                               |   |                                   |              |               |                 |                         |
| 4   | Two foci only                                                                                                                          |                                                                      |                                                                                                                                                                                                                                                                                                                                                                                                                                                                                                                    |   |                 |                   |                                                                |                 |                     |   |                 |               |             |                 |                               |   |                                   |              |               |                 |                         |
| 5   | Hemispheric                                                                                                                            |                                                                      |                                                                                                                                                                                                                                                                                                                                                                                                                                                                                                                    |   |                 |                   |                                                                |                 |                     |   |                 |               |             |                 |                               |   |                                   |              |               |                 |                         |
| 6   | Generalized                                                                                                                            |                                                                      |                                                                                                                                                                                                                                                                                                                                                                                                                                                                                                                    |   |                 |                   |                                                                |                 |                     |   |                 |               |             |                 |                               |   |                                   |              |               |                 |                         |
| 7   | Generalized plus focal/multifocal                                                                                                      |                                                                      |                                                                                                                                                                                                                                                                                                                                                                                                                                                                                                                    |   |                 |                   |                                                                |                 |                     |   |                 |               |             |                 |                               |   |                                   |              |               |                 |                         |
| 9   | Not available                                                                                                                          |                                                                      |                                                                                                                                                                                                                                                                                                                                                                                                                                                                                                                    |   |                 |                   |                                                                |                 |                     |   |                 |               |             |                 |                               |   |                                   |              |               |                 |                         |
| 225 | <p>[ <b>unknown_eeg2</b> ]</p> <p>Show the field ONLY if:<br/>[resp_med2(7)] = '1'</p>                                                 | <p>Was there an EEG after treatment with the unknown medication?</p> | <p>radio</p> <table border="1"> <tr> <td>1</td> <td>Yes</td> </tr> <tr> <td>2</td> <td>No</td> </tr> <tr> <td>9</td> <td>Unknown</td> </tr> </table>                                                                                                                                                                                                                                                                                                                                                               | 1 | Yes             | 2                 | No                                                             | 9               | Unknown             |   |                 |               |             |                 |                               |   |                                   |              |               |                 |                         |
| 1   | Yes                                                                                                                                    |                                                                      |                                                                                                                                                                                                                                                                                                                                                                                                                                                                                                                    |   |                 |                   |                                                                |                 |                     |   |                 |               |             |                 |                               |   |                                   |              |               |                 |                         |
| 2   | No                                                                                                                                     |                                                                      |                                                                                                                                                                                                                                                                                                                                                                                                                                                                                                                    |   |                 |                   |                                                                |                 |                     |   |                 |               |             |                 |                               |   |                                   |              |               |                 |                         |
| 9   | Unknown                                                                                                                                |                                                                      |                                                                                                                                                                                                                                                                                                                                                                                                                                                                                                                    |   |                 |                   |                                                                |                 |                     |   |                 |               |             |                 |                               |   |                                   |              |               |                 |                         |

|     |                                                                                                                                          |                                                                       |                                                                                                                                                                                                                                                                                                                                                                                                                                                                                                                                                                                                                                                                                                                                                                                                                                                                                                                                                                                                                                                                                                |   |                     |                   |                                                                   |                     |                            |   |                     |               |             |                     |                                  |   |                                   |                                       |               |                   |                         |
|-----|------------------------------------------------------------------------------------------------------------------------------------------|-----------------------------------------------------------------------|------------------------------------------------------------------------------------------------------------------------------------------------------------------------------------------------------------------------------------------------------------------------------------------------------------------------------------------------------------------------------------------------------------------------------------------------------------------------------------------------------------------------------------------------------------------------------------------------------------------------------------------------------------------------------------------------------------------------------------------------------------------------------------------------------------------------------------------------------------------------------------------------------------------------------------------------------------------------------------------------------------------------------------------------------------------------------------------------|---|---------------------|-------------------|-------------------------------------------------------------------|---------------------|----------------------------|---|---------------------|---------------|-------------|---------------------|----------------------------------|---|-----------------------------------|---------------------------------------|---------------|-------------------|-------------------------|
| 226 | <p>[ <b>unknown_feature2</b> ]</p> <p>Show the field ONLY if:<br/>[unknown_eeg2] = '1'</p>                                               | <p>If yes, check all that apply:<br/><i>select all that apply</i></p> | <p>checkbox</p> <table border="1"> <tr> <td data-bbox="1356 123 1388 175">2</td> <td data-bbox="1388 123 1688 175">unknown_feature2__2</td> <td data-bbox="1688 123 1992 175">Hypsarrhythmia</td> </tr> <tr> <td data-bbox="1356 175 1388 266">3</td> <td data-bbox="1388 175 1688 266">unknown_feature2__3</td> <td data-bbox="1688 175 1992 266">Modified<br/>hypsarrhythmia</td> </tr> <tr> <td data-bbox="1356 266 1388 318">4</td> <td data-bbox="1388 266 1688 318">unknown_feature2__4</td> <td data-bbox="1688 266 1992 318">Other</td> </tr> <tr> <td data-bbox="1356 318 1388 370">5</td> <td data-bbox="1388 318 1688 370">unknown_feature2__5</td> <td data-bbox="1688 318 1992 370">Normal</td> </tr> <tr> <td data-bbox="1356 370 1388 461">6</td> <td data-bbox="1388 370 1688 461">unknown_feature2__6</td> <td data-bbox="1688 370 1992 461">Any abnormality [NISC<br/>cohort only]</td> </tr> </table>                                                                                                                                                                       | 2 | unknown_feature2__2 | Hypsarrhythmia    | 3                                                                 | unknown_feature2__3 | Modified<br>hypsarrhythmia | 4 | unknown_feature2__4 | Other         | 5           | unknown_feature2__5 | Normal                           | 6 | unknown_feature2__6               | Any abnormality [NISC<br>cohort only] |               |                   |                         |
| 2   | unknown_feature2__2                                                                                                                      | Hypsarrhythmia                                                        |                                                                                                                                                                                                                                                                                                                                                                                                                                                                                                                                                                                                                                                                                                                                                                                                                                                                                                                                                                                                                                                                                                |   |                     |                   |                                                                   |                     |                            |   |                     |               |             |                     |                                  |   |                                   |                                       |               |                   |                         |
| 3   | unknown_feature2__3                                                                                                                      | Modified<br>hypsarrhythmia                                            |                                                                                                                                                                                                                                                                                                                                                                                                                                                                                                                                                                                                                                                                                                                                                                                                                                                                                                                                                                                                                                                                                                |   |                     |                   |                                                                   |                     |                            |   |                     |               |             |                     |                                  |   |                                   |                                       |               |                   |                         |
| 4   | unknown_feature2__4                                                                                                                      | Other                                                                 |                                                                                                                                                                                                                                                                                                                                                                                                                                                                                                                                                                                                                                                                                                                                                                                                                                                                                                                                                                                                                                                                                                |   |                     |                   |                                                                   |                     |                            |   |                     |               |             |                     |                                  |   |                                   |                                       |               |                   |                         |
| 5   | unknown_feature2__5                                                                                                                      | Normal                                                                |                                                                                                                                                                                                                                                                                                                                                                                                                                                                                                                                                                                                                                                                                                                                                                                                                                                                                                                                                                                                                                                                                                |   |                     |                   |                                                                   |                     |                            |   |                     |               |             |                     |                                  |   |                                   |                                       |               |                   |                         |
| 6   | unknown_feature2__6                                                                                                                      | Any abnormality [NISC<br>cohort only]                                 |                                                                                                                                                                                                                                                                                                                                                                                                                                                                                                                                                                                                                                                                                                                                                                                                                                                                                                                                                                                                                                                                                                |   |                     |                   |                                                                   |                     |                            |   |                     |               |             |                     |                                  |   |                                   |                                       |               |                   |                         |
| 227 | <p>[ <b>unknown_other2</b> ]</p> <p>Show the field ONLY if:<br/>[unknown_feature2(4)] = '1'</p>                                          | <p>If other, please check all that apply:</p>                         | <p>checkbox</p> <table border="1"> <tr> <td data-bbox="1356 513 1388 565">1</td> <td data-bbox="1388 513 1667 565">unknown_other2__1</td> <td data-bbox="1667 513 1992 565">Burst suppression</td> </tr> <tr> <td data-bbox="1356 565 1388 617">2</td> <td data-bbox="1388 565 1667 617">unknown_other2__2</td> <td data-bbox="1667 565 1992 617">Generalized slowing</td> </tr> <tr> <td data-bbox="1356 617 1388 669">3</td> <td data-bbox="1388 617 1667 669">unknown_other2__3</td> <td data-bbox="1667 617 1992 669">Focal slowing</td> </tr> <tr> <td data-bbox="1356 669 1388 760">4</td> <td data-bbox="1388 669 1667 760">unknown_other2__4</td> <td data-bbox="1667 669 1992 760">Normal PDR and sleep<br/>features</td> </tr> <tr> <td data-bbox="1356 760 1388 812">5</td> <td data-bbox="1388 760 1667 812">unknown_other2__5</td> <td data-bbox="1667 760 1992 812">Abnormal PDR</td> </tr> <tr> <td data-bbox="1356 812 1388 863">6</td> <td data-bbox="1388 812 1667 863">unknown_other2__6</td> <td data-bbox="1667 812 1992 863">Abnormal sleep features</td> </tr> </table> | 1 | unknown_other2__1   | Burst suppression | 2                                                                 | unknown_other2__2   | Generalized slowing        | 3 | unknown_other2__3   | Focal slowing | 4           | unknown_other2__4   | Normal PDR and sleep<br>features | 5 | unknown_other2__5                 | Abnormal PDR                          | 6             | unknown_other2__6 | Abnormal sleep features |
| 1   | unknown_other2__1                                                                                                                        | Burst suppression                                                     |                                                                                                                                                                                                                                                                                                                                                                                                                                                                                                                                                                                                                                                                                                                                                                                                                                                                                                                                                                                                                                                                                                |   |                     |                   |                                                                   |                     |                            |   |                     |               |             |                     |                                  |   |                                   |                                       |               |                   |                         |
| 2   | unknown_other2__2                                                                                                                        | Generalized slowing                                                   |                                                                                                                                                                                                                                                                                                                                                                                                                                                                                                                                                                                                                                                                                                                                                                                                                                                                                                                                                                                                                                                                                                |   |                     |                   |                                                                   |                     |                            |   |                     |               |             |                     |                                  |   |                                   |                                       |               |                   |                         |
| 3   | unknown_other2__3                                                                                                                        | Focal slowing                                                         |                                                                                                                                                                                                                                                                                                                                                                                                                                                                                                                                                                                                                                                                                                                                                                                                                                                                                                                                                                                                                                                                                                |   |                     |                   |                                                                   |                     |                            |   |                     |               |             |                     |                                  |   |                                   |                                       |               |                   |                         |
| 4   | unknown_other2__4                                                                                                                        | Normal PDR and sleep<br>features                                      |                                                                                                                                                                                                                                                                                                                                                                                                                                                                                                                                                                                                                                                                                                                                                                                                                                                                                                                                                                                                                                                                                                |   |                     |                   |                                                                   |                     |                            |   |                     |               |             |                     |                                  |   |                                   |                                       |               |                   |                         |
| 5   | unknown_other2__5                                                                                                                        | Abnormal PDR                                                          |                                                                                                                                                                                                                                                                                                                                                                                                                                                                                                                                                                                                                                                                                                                                                                                                                                                                                                                                                                                                                                                                                                |   |                     |                   |                                                                   |                     |                            |   |                     |               |             |                     |                                  |   |                                   |                                       |               |                   |                         |
| 6   | unknown_other2__6                                                                                                                        | Abnormal sleep features                                               |                                                                                                                                                                                                                                                                                                                                                                                                                                                                                                                                                                                                                                                                                                                                                                                                                                                                                                                                                                                                                                                                                                |   |                     |                   |                                                                   |                     |                            |   |                     |               |             |                     |                                  |   |                                   |                                       |               |                   |                         |
| 228 | <p>[ <b>unknown_other3</b> ]</p> <p>Show the field ONLY if:<br/>[unknown_feature2(4)] = '1'</p>                                          | <p>If other, please add any relevant notes:</p>                       | <p>notes</p>                                                                                                                                                                                                                                                                                                                                                                                                                                                                                                                                                                                                                                                                                                                                                                                                                                                                                                                                                                                                                                                                                   |   |                     |                   |                                                                   |                     |                            |   |                     |               |             |                     |                                  |   |                                   |                                       |               |                   |                         |
| 229 | <p>[ <b>unknown_interictal2</b> ]</p> <p>Show the field ONLY if:<br/>[unknown_feature2(4)] = '1' o<br/>r [unknown_feature2(6)] = '1'</p> | <p>Do any of the following interictal activities apply?</p>           | <p>radio</p> <table border="1"> <tr> <td data-bbox="1356 1065 1388 1117">0</td> <td data-bbox="1388 1065 1992 1117">None</td> </tr> <tr> <td data-bbox="1356 1117 1388 1208">1</td> <td data-bbox="1388 1117 1992 1208">Multifocal (3 or more foci, independent from<br/>both hemispheres)</td> </tr> <tr> <td data-bbox="1356 1208 1388 1260">3</td> <td data-bbox="1388 1208 1992 1260">Single focus</td> </tr> <tr> <td data-bbox="1356 1260 1388 1312">4</td> <td data-bbox="1388 1260 1992 1312">Two foci only</td> </tr> <tr> <td data-bbox="1356 1312 1388 1364">5</td> <td data-bbox="1388 1312 1992 1364">Hemispheric</td> </tr> <tr> <td data-bbox="1356 1364 1388 1416">6</td> <td data-bbox="1388 1364 1992 1416">Generalized</td> </tr> <tr> <td data-bbox="1356 1416 1388 1468">7</td> <td data-bbox="1388 1416 1992 1468">Generalized plus focal/multifocal</td> </tr> <tr> <td data-bbox="1356 1468 1388 1520">9</td> <td data-bbox="1388 1468 1992 1520">Not available</td> </tr> </table>                                                                                    | 0 | None                | 1                 | Multifocal (3 or more foci, independent from<br>both hemispheres) | 3                   | Single focus               | 4 | Two foci only       | 5             | Hemispheric | 6                   | Generalized                      | 7 | Generalized plus focal/multifocal | 9                                     | Not available |                   |                         |
| 0   | None                                                                                                                                     |                                                                       |                                                                                                                                                                                                                                                                                                                                                                                                                                                                                                                                                                                                                                                                                                                                                                                                                                                                                                                                                                                                                                                                                                |   |                     |                   |                                                                   |                     |                            |   |                     |               |             |                     |                                  |   |                                   |                                       |               |                   |                         |
| 1   | Multifocal (3 or more foci, independent from<br>both hemispheres)                                                                        |                                                                       |                                                                                                                                                                                                                                                                                                                                                                                                                                                                                                                                                                                                                                                                                                                                                                                                                                                                                                                                                                                                                                                                                                |   |                     |                   |                                                                   |                     |                            |   |                     |               |             |                     |                                  |   |                                   |                                       |               |                   |                         |
| 3   | Single focus                                                                                                                             |                                                                       |                                                                                                                                                                                                                                                                                                                                                                                                                                                                                                                                                                                                                                                                                                                                                                                                                                                                                                                                                                                                                                                                                                |   |                     |                   |                                                                   |                     |                            |   |                     |               |             |                     |                                  |   |                                   |                                       |               |                   |                         |
| 4   | Two foci only                                                                                                                            |                                                                       |                                                                                                                                                                                                                                                                                                                                                                                                                                                                                                                                                                                                                                                                                                                                                                                                                                                                                                                                                                                                                                                                                                |   |                     |                   |                                                                   |                     |                            |   |                     |               |             |                     |                                  |   |                                   |                                       |               |                   |                         |
| 5   | Hemispheric                                                                                                                              |                                                                       |                                                                                                                                                                                                                                                                                                                                                                                                                                                                                                                                                                                                                                                                                                                                                                                                                                                                                                                                                                                                                                                                                                |   |                     |                   |                                                                   |                     |                            |   |                     |               |             |                     |                                  |   |                                   |                                       |               |                   |                         |
| 6   | Generalized                                                                                                                              |                                                                       |                                                                                                                                                                                                                                                                                                                                                                                                                                                                                                                                                                                                                                                                                                                                                                                                                                                                                                                                                                                                                                                                                                |   |                     |                   |                                                                   |                     |                            |   |                     |               |             |                     |                                  |   |                                   |                                       |               |                   |                         |
| 7   | Generalized plus focal/multifocal                                                                                                        |                                                                       |                                                                                                                                                                                                                                                                                                                                                                                                                                                                                                                                                                                                                                                                                                                                                                                                                                                                                                                                                                                                                                                                                                |   |                     |                   |                                                                   |                     |                            |   |                     |               |             |                     |                                  |   |                                   |                                       |               |                   |                         |
| 9   | Not available                                                                                                                            |                                                                       |                                                                                                                                                                                                                                                                                                                                                                                                                                                                                                                                                                                                                                                                                                                                                                                                                                                                                                                                                                                                                                                                                                |   |                     |                   |                                                                   |                     |                            |   |                     |               |             |                     |                                  |   |                                   |                                       |               |                   |                         |

|     |                                                                         |                                                                                             |                                                                                                                                                                                                                                                                                                                                                                                                                                                                                                     |   |              |            |    |              |                                                         |   |              |               |   |              |            |   |              |               |   |              |       |   |              |         |
|-----|-------------------------------------------------------------------------|---------------------------------------------------------------------------------------------|-----------------------------------------------------------------------------------------------------------------------------------------------------------------------------------------------------------------------------------------------------------------------------------------------------------------------------------------------------------------------------------------------------------------------------------------------------------------------------------------------------|---|--------------|------------|----|--------------|---------------------------------------------------------|---|--------------|---------------|---|--------------|------------|---|--------------|---------------|---|--------------|-------|---|--------------|---------|
| 230 | [ part_resp2 ]                                                          | Did the child have partial response to 2nd line medications for spasms? [CDKL5 cohort only] | radio<br><table border="1"> <tr> <td>1</td> <td>Yes</td> </tr> <tr> <td>2</td> <td>No</td> </tr> <tr> <td>0</td> <td>N/A (was not on any second-line medications for spasms)</td> </tr> <tr> <td>9</td> <td>Unknown</td> </tr> </table>                                                                                                                                                                                                                                                             | 1 | Yes          | 2          | No | 0            | N/A (was not on any second-line medications for spasms) | 9 | Unknown      |               |   |              |            |   |              |               |   |              |       |   |              |         |
| 1   | Yes                                                                     |                                                                                             |                                                                                                                                                                                                                                                                                                                                                                                                                                                                                                     |   |              |            |    |              |                                                         |   |              |               |   |              |            |   |              |               |   |              |       |   |              |         |
| 2   | No                                                                      |                                                                                             |                                                                                                                                                                                                                                                                                                                                                                                                                                                                                                     |   |              |            |    |              |                                                         |   |              |               |   |              |            |   |              |               |   |              |       |   |              |         |
| 0   | N/A (was not on any second-line medications for spasms)                 |                                                                                             |                                                                                                                                                                                                                                                                                                                                                                                                                                                                                                     |   |              |            |    |              |                                                         |   |              |               |   |              |            |   |              |               |   |              |       |   |              |         |
| 9   | Unknown                                                                 |                                                                                             |                                                                                                                                                                                                                                                                                                                                                                                                                                                                                                     |   |              |            |    |              |                                                         |   |              |               |   |              |            |   |              |               |   |              |       |   |              |         |
| 231 | [ part_med2 ]<br>Show the field ONLY if:<br>[part_resp2] = '1'          | If yes check all that apply:                                                                | checkbox<br><table border="1"> <tr> <td>1</td> <td>part_med2__1</td> <td>Topiramate</td> </tr> <tr> <td>2</td> <td>part_med2__2</td> <td>Clobazam</td> </tr> <tr> <td>3</td> <td>part_med2__3</td> <td>Valproic Acid</td> </tr> <tr> <td>4</td> <td>part_med2__4</td> <td>Rufinamide</td> </tr> <tr> <td>5</td> <td>part_med2__5</td> <td>Levetiracetam</td> </tr> <tr> <td>6</td> <td>part_med2__6</td> <td>Other</td> </tr> <tr> <td>7</td> <td>part_med2__7</td> <td>Unknown</td> </tr> </table> | 1 | part_med2__1 | Topiramate | 2  | part_med2__2 | Clobazam                                                | 3 | part_med2__3 | Valproic Acid | 4 | part_med2__4 | Rufinamide | 5 | part_med2__5 | Levetiracetam | 6 | part_med2__6 | Other | 7 | part_med2__7 | Unknown |
| 1   | part_med2__1                                                            | Topiramate                                                                                  |                                                                                                                                                                                                                                                                                                                                                                                                                                                                                                     |   |              |            |    |              |                                                         |   |              |               |   |              |            |   |              |               |   |              |       |   |              |         |
| 2   | part_med2__2                                                            | Clobazam                                                                                    |                                                                                                                                                                                                                                                                                                                                                                                                                                                                                                     |   |              |            |    |              |                                                         |   |              |               |   |              |            |   |              |               |   |              |       |   |              |         |
| 3   | part_med2__3                                                            | Valproic Acid                                                                               |                                                                                                                                                                                                                                                                                                                                                                                                                                                                                                     |   |              |            |    |              |                                                         |   |              |               |   |              |            |   |              |               |   |              |       |   |              |         |
| 4   | part_med2__4                                                            | Rufinamide                                                                                  |                                                                                                                                                                                                                                                                                                                                                                                                                                                                                                     |   |              |            |    |              |                                                         |   |              |               |   |              |            |   |              |               |   |              |       |   |              |         |
| 5   | part_med2__5                                                            | Levetiracetam                                                                               |                                                                                                                                                                                                                                                                                                                                                                                                                                                                                                     |   |              |            |    |              |                                                         |   |              |               |   |              |            |   |              |               |   |              |       |   |              |         |
| 6   | part_med2__6                                                            | Other                                                                                       |                                                                                                                                                                                                                                                                                                                                                                                                                                                                                                     |   |              |            |    |              |                                                         |   |              |               |   |              |            |   |              |               |   |              |       |   |              |         |
| 7   | part_med2__7                                                            | Unknown                                                                                     |                                                                                                                                                                                                                                                                                                                                                                                                                                                                                                     |   |              |            |    |              |                                                         |   |              |               |   |              |            |   |              |               |   |              |       |   |              |         |
| 232 | [ part_med3 ]<br>Show the field ONLY if:<br>[part_med2(6)] = '1'        | If other, please specify name of medication:                                                | notes                                                                                                                                                                                                                                                                                                                                                                                                                                                                                               |   |              |            |    |              |                                                         |   |              |               |   |              |            |   |              |               |   |              |       |   |              |         |
| 233 | [ dev_regress ]                                                         | Section Header: <i>Development</i><br>Was there developmental regression?                   | radio<br><table border="1"> <tr> <td>1</td> <td>Yes</td> </tr> <tr> <td>2</td> <td>No</td> </tr> <tr> <td>9</td> <td>Unknown</td> </tr> </table>                                                                                                                                                                                                                                                                                                                                                    | 1 | Yes          | 2          | No | 9            | Unknown                                                 |   |              |               |   |              |            |   |              |               |   |              |       |   |              |         |
| 1   | Yes                                                                     |                                                                                             |                                                                                                                                                                                                                                                                                                                                                                                                                                                                                                     |   |              |            |    |              |                                                         |   |              |               |   |              |            |   |              |               |   |              |       |   |              |         |
| 2   | No                                                                      |                                                                                             |                                                                                                                                                                                                                                                                                                                                                                                                                                                                                                     |   |              |            |    |              |                                                         |   |              |               |   |              |            |   |              |               |   |              |       |   |              |         |
| 9   | Unknown                                                                 |                                                                                             |                                                                                                                                                                                                                                                                                                                                                                                                                                                                                                     |   |              |            |    |              |                                                         |   |              |               |   |              |            |   |              |               |   |              |       |   |              |         |
| 234 | [ dev_regress_spasm ]<br>Show the field ONLY if:<br>[dev_regress] = '1' | If yes, was the developmental regression associated with spasms?                            | radio<br><table border="1"> <tr> <td>1</td> <td>Yes</td> </tr> <tr> <td>2</td> <td>No</td> </tr> <tr> <td>9</td> <td>Unknown</td> </tr> </table>                                                                                                                                                                                                                                                                                                                                                    | 1 | Yes          | 2          | No | 9            | Unknown                                                 |   |              |               |   |              |            |   |              |               |   |              |       |   |              |         |
| 1   | Yes                                                                     |                                                                                             |                                                                                                                                                                                                                                                                                                                                                                                                                                                                                                     |   |              |            |    |              |                                                         |   |              |               |   |              |            |   |              |               |   |              |       |   |              |         |
| 2   | No                                                                      |                                                                                             |                                                                                                                                                                                                                                                                                                                                                                                                                                                                                                     |   |              |            |    |              |                                                         |   |              |               |   |              |            |   |              |               |   |              |       |   |              |         |
| 9   | Unknown                                                                 |                                                                                             |                                                                                                                                                                                                                                                                                                                                                                                                                                                                                                     |   |              |            |    |              |                                                         |   |              |               |   |              |            |   |              |               |   |              |       |   |              |         |

|     |                                                             |                                                                                            |                                                                                                                                                                                                                                                                                                                                                                                                                                                                                                                                                                                                                     |   |               |              |    |               |         |   |               |       |   |               |           |   |               |                        |   |               |                  |   |               |        |   |               |        |   |               |                 |
|-----|-------------------------------------------------------------|--------------------------------------------------------------------------------------------|---------------------------------------------------------------------------------------------------------------------------------------------------------------------------------------------------------------------------------------------------------------------------------------------------------------------------------------------------------------------------------------------------------------------------------------------------------------------------------------------------------------------------------------------------------------------------------------------------------------------|---|---------------|--------------|----|---------------|---------|---|---------------|-------|---|---------------|-----------|---|---------------|------------------------|---|---------------|------------------|---|---------------|--------|---|---------------|--------|---|---------------|-----------------|
| 235 | [pre_spasms]                                                | Section Header: <i>Seizures prior to spasms</i><br>Seizures (other types) prior to spasms? | radio<br><table border="1"> <tr><td>1</td><td>Yes</td></tr> <tr><td>2</td><td>No</td></tr> <tr><td>9</td><td>Unknown</td></tr> </table>                                                                                                                                                                                                                                                                                                                                                                                                                                                                             | 1 | Yes           | 2            | No | 9             | Unknown |   |               |       |   |               |           |   |               |                        |   |               |                  |   |               |        |   |               |        |   |               |                 |
| 1   | Yes                                                         |                                                                                            |                                                                                                                                                                                                                                                                                                                                                                                                                                                                                                                                                                                                                     |   |               |              |    |               |         |   |               |       |   |               |           |   |               |                        |   |               |                  |   |               |        |   |               |        |   |               |                 |
| 2   | No                                                          |                                                                                            |                                                                                                                                                                                                                                                                                                                                                                                                                                                                                                                                                                                                                     |   |               |              |    |               |         |   |               |       |   |               |           |   |               |                        |   |               |                  |   |               |        |   |               |        |   |               |                 |
| 9   | Unknown                                                     |                                                                                            |                                                                                                                                                                                                                                                                                                                                                                                                                                                                                                                                                                                                                     |   |               |              |    |               |         |   |               |       |   |               |           |   |               |                        |   |               |                  |   |               |        |   |               |        |   |               |                 |
| 236 | [gen_mot]<br>Show the field ONLY if:<br>[pre_spasms] = '1'  | Did they have generalized onset seizures, motor? (prior to spasms)                         | radio<br><table border="1"> <tr><td>1</td><td>Yes</td></tr> <tr><td>2</td><td>No</td></tr> <tr><td>9</td><td>Unknown</td></tr> </table>                                                                                                                                                                                                                                                                                                                                                                                                                                                                             | 1 | Yes           | 2            | No | 9             | Unknown |   |               |       |   |               |           |   |               |                        |   |               |                  |   |               |        |   |               |        |   |               |                 |
| 1   | Yes                                                         |                                                                                            |                                                                                                                                                                                                                                                                                                                                                                                                                                                                                                                                                                                                                     |   |               |              |    |               |         |   |               |       |   |               |           |   |               |                        |   |               |                  |   |               |        |   |               |        |   |               |                 |
| 2   | No                                                          |                                                                                            |                                                                                                                                                                                                                                                                                                                                                                                                                                                                                                                                                                                                                     |   |               |              |    |               |         |   |               |       |   |               |           |   |               |                        |   |               |                  |   |               |        |   |               |        |   |               |                 |
| 9   | Unknown                                                     |                                                                                            |                                                                                                                                                                                                                                                                                                                                                                                                                                                                                                                                                                                                                     |   |               |              |    |               |         |   |               |       |   |               |           |   |               |                        |   |               |                  |   |               |        |   |               |        |   |               |                 |
| 237 | [gen_mottyp]<br>Show the field ONLY if:<br>[gen_mot] = '1'  | If yes, check all that apply:                                                              | checkbox<br><table border="1"> <tr><td>1</td><td>gen_mottyp__1</td><td>Tonic-clonic</td></tr> <tr><td>2</td><td>gen_mottyp__2</td><td>Clonic</td></tr> <tr><td>3</td><td>gen_mottyp__3</td><td>Tonic</td></tr> <tr><td>4</td><td>gen_mottyp__4</td><td>Myoclonic</td></tr> <tr><td>5</td><td>gen_mottyp__5</td><td>Myoclonic-tonic-clonic</td></tr> <tr><td>6</td><td>gen_mottyp__6</td><td>Myoclonic-atonic</td></tr> <tr><td>7</td><td>gen_mottyp__7</td><td>Atonic</td></tr> <tr><td>8</td><td>gen_mottyp__8</td><td>Spasms</td></tr> <tr><td>9</td><td>gen_mottyp__9</td><td>Unknown subtype</td></tr> </table> | 1 | gen_mottyp__1 | Tonic-clonic | 2  | gen_mottyp__2 | Clonic  | 3 | gen_mottyp__3 | Tonic | 4 | gen_mottyp__4 | Myoclonic | 5 | gen_mottyp__5 | Myoclonic-tonic-clonic | 6 | gen_mottyp__6 | Myoclonic-atonic | 7 | gen_mottyp__7 | Atonic | 8 | gen_mottyp__8 | Spasms | 9 | gen_mottyp__9 | Unknown subtype |
| 1   | gen_mottyp__1                                               | Tonic-clonic                                                                               |                                                                                                                                                                                                                                                                                                                                                                                                                                                                                                                                                                                                                     |   |               |              |    |               |         |   |               |       |   |               |           |   |               |                        |   |               |                  |   |               |        |   |               |        |   |               |                 |
| 2   | gen_mottyp__2                                               | Clonic                                                                                     |                                                                                                                                                                                                                                                                                                                                                                                                                                                                                                                                                                                                                     |   |               |              |    |               |         |   |               |       |   |               |           |   |               |                        |   |               |                  |   |               |        |   |               |        |   |               |                 |
| 3   | gen_mottyp__3                                               | Tonic                                                                                      |                                                                                                                                                                                                                                                                                                                                                                                                                                                                                                                                                                                                                     |   |               |              |    |               |         |   |               |       |   |               |           |   |               |                        |   |               |                  |   |               |        |   |               |        |   |               |                 |
| 4   | gen_mottyp__4                                               | Myoclonic                                                                                  |                                                                                                                                                                                                                                                                                                                                                                                                                                                                                                                                                                                                                     |   |               |              |    |               |         |   |               |       |   |               |           |   |               |                        |   |               |                  |   |               |        |   |               |        |   |               |                 |
| 5   | gen_mottyp__5                                               | Myoclonic-tonic-clonic                                                                     |                                                                                                                                                                                                                                                                                                                                                                                                                                                                                                                                                                                                                     |   |               |              |    |               |         |   |               |       |   |               |           |   |               |                        |   |               |                  |   |               |        |   |               |        |   |               |                 |
| 6   | gen_mottyp__6                                               | Myoclonic-atonic                                                                           |                                                                                                                                                                                                                                                                                                                                                                                                                                                                                                                                                                                                                     |   |               |              |    |               |         |   |               |       |   |               |           |   |               |                        |   |               |                  |   |               |        |   |               |        |   |               |                 |
| 7   | gen_mottyp__7                                               | Atonic                                                                                     |                                                                                                                                                                                                                                                                                                                                                                                                                                                                                                                                                                                                                     |   |               |              |    |               |         |   |               |       |   |               |           |   |               |                        |   |               |                  |   |               |        |   |               |        |   |               |                 |
| 8   | gen_mottyp__8                                               | Spasms                                                                                     |                                                                                                                                                                                                                                                                                                                                                                                                                                                                                                                                                                                                                     |   |               |              |    |               |         |   |               |       |   |               |           |   |               |                        |   |               |                  |   |               |        |   |               |        |   |               |                 |
| 9   | gen_mottyp__9                                               | Unknown subtype                                                                            |                                                                                                                                                                                                                                                                                                                                                                                                                                                                                                                                                                                                                     |   |               |              |    |               |         |   |               |       |   |               |           |   |               |                        |   |               |                  |   |               |        |   |               |        |   |               |                 |
| 238 | [gen_nmot]<br>Show the field ONLY if:<br>[pre_spasms] = '1' | Did they have generalized onset seizures, nonmotor (absence)? (prior to spasms)            | radio<br><table border="1"> <tr><td>1</td><td>Yes</td></tr> <tr><td>2</td><td>No</td></tr> <tr><td>9</td><td>Unknown</td></tr> </table>                                                                                                                                                                                                                                                                                                                                                                                                                                                                             | 1 | Yes           | 2            | No | 9             | Unknown |   |               |       |   |               |           |   |               |                        |   |               |                  |   |               |        |   |               |        |   |               |                 |
| 1   | Yes                                                         |                                                                                            |                                                                                                                                                                                                                                                                                                                                                                                                                                                                                                                                                                                                                     |   |               |              |    |               |         |   |               |       |   |               |           |   |               |                        |   |               |                  |   |               |        |   |               |        |   |               |                 |
| 2   | No                                                          |                                                                                            |                                                                                                                                                                                                                                                                                                                                                                                                                                                                                                                                                                                                                     |   |               |              |    |               |         |   |               |       |   |               |           |   |               |                        |   |               |                  |   |               |        |   |               |        |   |               |                 |
| 9   | Unknown                                                     |                                                                                            |                                                                                                                                                                                                                                                                                                                                                                                                                                                                                                                                                                                                                     |   |               |              |    |               |         |   |               |       |   |               |           |   |               |                        |   |               |                  |   |               |        |   |               |        |   |               |                 |



|     |                                                                                  |                                                                   |                                                                                                                                                                                                                                                                                                                                                                                                                                                                    |   |                |                     |    |                |                         |   |                |                             |   |                |                  |   |               |                 |   |            |                                 |
|-----|----------------------------------------------------------------------------------|-------------------------------------------------------------------|--------------------------------------------------------------------------------------------------------------------------------------------------------------------------------------------------------------------------------------------------------------------------------------------------------------------------------------------------------------------------------------------------------------------------------------------------------------------|---|----------------|---------------------|----|----------------|-------------------------|---|----------------|-----------------------------|---|----------------|------------------|---|---------------|-----------------|---|------------|---------------------------------|
| 239 | <p>[ <b>gen_nmotyp</b> ]</p> <p>Show the field ONLY if:<br/>[gen_nmot] = '1'</p> | <p>If yes, check all that apply:</p>                              | <p>checkbox</p> <table border="1"> <tr> <td>1</td> <td>gen_nmotyp__1</td> <td>Typical</td> </tr> <tr> <td>2</td> <td>gen_nmotyp__2</td> <td>Atypical</td> </tr> <tr> <td>3</td> <td>gen_nmotyp__3</td> <td>Myoclonic</td> </tr> <tr> <td>4</td> <td>gen_nmotyp__4</td> <td>Eyelid myoclonic</td> </tr> <tr> <td>5</td> <td>gen_nmotyp__5</td> <td>Unknown subtype</td> </tr> </table>                                                                              | 1 | gen_nmotyp__1  | Typical             | 2  | gen_nmotyp__2  | Atypical                | 3 | gen_nmotyp__3  | Myoclonic                   | 4 | gen_nmotyp__4  | Eyelid myoclonic | 5 | gen_nmotyp__5 | Unknown subtype |   |            |                                 |
| 1   | gen_nmotyp__1                                                                    | Typical                                                           |                                                                                                                                                                                                                                                                                                                                                                                                                                                                    |   |                |                     |    |                |                         |   |                |                             |   |                |                  |   |               |                 |   |            |                                 |
| 2   | gen_nmotyp__2                                                                    | Atypical                                                          |                                                                                                                                                                                                                                                                                                                                                                                                                                                                    |   |                |                     |    |                |                         |   |                |                             |   |                |                  |   |               |                 |   |            |                                 |
| 3   | gen_nmotyp__3                                                                    | Myoclonic                                                         |                                                                                                                                                                                                                                                                                                                                                                                                                                                                    |   |                |                     |    |                |                         |   |                |                             |   |                |                  |   |               |                 |   |            |                                 |
| 4   | gen_nmotyp__4                                                                    | Eyelid myoclonic                                                  |                                                                                                                                                                                                                                                                                                                                                                                                                                                                    |   |                |                     |    |                |                         |   |                |                             |   |                |                  |   |               |                 |   |            |                                 |
| 5   | gen_nmotyp__5                                                                    | Unknown subtype                                                   |                                                                                                                                                                                                                                                                                                                                                                                                                                                                    |   |                |                     |    |                |                         |   |                |                             |   |                |                  |   |               |                 |   |            |                                 |
| 240 | <p>[ <b>foc_sz</b> ]</p> <p>Show the field ONLY if:<br/>[pre_spasms] = '1'</p>   | <p>Did they have focal seizures? (prior to spasms)</p>            | <p>radio</p> <table border="1"> <tr> <td>1</td> <td>Yes</td> </tr> <tr> <td>2</td> <td>No</td> </tr> <tr> <td>9</td> <td>Unknown</td> </tr> </table>                                                                                                                                                                                                                                                                                                               | 1 | Yes            | 2                   | No | 9              | Unknown                 |   |                |                             |   |                |                  |   |               |                 |   |            |                                 |
| 1   | Yes                                                                              |                                                                   |                                                                                                                                                                                                                                                                                                                                                                                                                                                                    |   |                |                     |    |                |                         |   |                |                             |   |                |                  |   |               |                 |   |            |                                 |
| 2   | No                                                                               |                                                                   |                                                                                                                                                                                                                                                                                                                                                                                                                                                                    |   |                |                     |    |                |                         |   |                |                             |   |                |                  |   |               |                 |   |            |                                 |
| 9   | Unknown                                                                          |                                                                   |                                                                                                                                                                                                                                                                                                                                                                                                                                                                    |   |                |                     |    |                |                         |   |                |                             |   |                |                  |   |               |                 |   |            |                                 |
| 241 | <p>[ <b>foc_typ</b> ]</p> <p>Show the field ONLY if:<br/>[foc_sz] = '1'</p>      | <p>If yes, check all that apply:</p>                              | <p>checkbox</p> <table border="1"> <tr> <td>1</td> <td>foc_typ__1</td> <td>Aware</td> </tr> <tr> <td>2</td> <td>foc_typ__2</td> <td>Impaired awareness</td> </tr> <tr> <td>3</td> <td>foc_typ__3</td> <td>Unknown subtype</td> </tr> <tr> <td>4</td> <td>foc_typ__4</td> <td>Motor onset</td> </tr> <tr> <td>5</td> <td>foc_typ__5</td> <td>Non-motor onset</td> </tr> <tr> <td>6</td> <td>foc_typ__6</td> <td>Focal to bilateral tonic clonic</td> </tr> </table> | 1 | foc_typ__1     | Aware               | 2  | foc_typ__2     | Impaired awareness      | 3 | foc_typ__3     | Unknown subtype             | 4 | foc_typ__4     | Motor onset      | 5 | foc_typ__5    | Non-motor onset | 6 | foc_typ__6 | Focal to bilateral tonic clonic |
| 1   | foc_typ__1                                                                       | Aware                                                             |                                                                                                                                                                                                                                                                                                                                                                                                                                                                    |   |                |                     |    |                |                         |   |                |                             |   |                |                  |   |               |                 |   |            |                                 |
| 2   | foc_typ__2                                                                       | Impaired awareness                                                |                                                                                                                                                                                                                                                                                                                                                                                                                                                                    |   |                |                     |    |                |                         |   |                |                             |   |                |                  |   |               |                 |   |            |                                 |
| 3   | foc_typ__3                                                                       | Unknown subtype                                                   |                                                                                                                                                                                                                                                                                                                                                                                                                                                                    |   |                |                     |    |                |                         |   |                |                             |   |                |                  |   |               |                 |   |            |                                 |
| 4   | foc_typ__4                                                                       | Motor onset                                                       |                                                                                                                                                                                                                                                                                                                                                                                                                                                                    |   |                |                     |    |                |                         |   |                |                             |   |                |                  |   |               |                 |   |            |                                 |
| 5   | foc_typ__5                                                                       | Non-motor onset                                                   |                                                                                                                                                                                                                                                                                                                                                                                                                                                                    |   |                |                     |    |                |                         |   |                |                             |   |                |                  |   |               |                 |   |            |                                 |
| 6   | foc_typ__6                                                                       | Focal to bilateral tonic clonic                                   |                                                                                                                                                                                                                                                                                                                                                                                                                                                                    |   |                |                     |    |                |                         |   |                |                             |   |                |                  |   |               |                 |   |            |                                 |
| 242 | <p>[ <b>unknown</b> ]</p> <p>Show the field ONLY if:<br/>[pre_spasms] = '1'</p>  | <p>Did they have seizures of unknown onset? (prior to spasms)</p> | <p>radio</p> <table border="1"> <tr> <td>1</td> <td>Yes</td> </tr> <tr> <td>2</td> <td>No</td> </tr> <tr> <td>9</td> <td>Unknown</td> </tr> </table>                                                                                                                                                                                                                                                                                                               | 1 | Yes            | 2                   | No | 9              | Unknown                 |   |                |                             |   |                |                  |   |               |                 |   |            |                                 |
| 1   | Yes                                                                              |                                                                   |                                                                                                                                                                                                                                                                                                                                                                                                                                                                    |   |                |                     |    |                |                         |   |                |                             |   |                |                  |   |               |                 |   |            |                                 |
| 2   | No                                                                               |                                                                   |                                                                                                                                                                                                                                                                                                                                                                                                                                                                    |   |                |                     |    |                |                         |   |                |                             |   |                |                  |   |               |                 |   |            |                                 |
| 9   | Unknown                                                                          |                                                                   |                                                                                                                                                                                                                                                                                                                                                                                                                                                                    |   |                |                     |    |                |                         |   |                |                             |   |                |                  |   |               |                 |   |            |                                 |
| 243 | <p>[ <b>unknown_typ</b> ]</p> <p>Show the field ONLY if:<br/>[unknown] = '1'</p> | <p>If yes, check all that apply:</p>                              | <p>checkbox</p> <table border="1"> <tr> <td>1</td> <td>unknown_typ__1</td> <td>Motor, tonic-clonic</td> </tr> <tr> <td>2</td> <td>unknown_typ__2</td> <td>Motor, epileptic spasms</td> </tr> <tr> <td>3</td> <td>unknown_typ__3</td> <td>Nonmotor, behavioral arrest</td> </tr> <tr> <td>4</td> <td>unknown_typ__4</td> <td>Unclassified</td> </tr> </table>                                                                                                       | 1 | unknown_typ__1 | Motor, tonic-clonic | 2  | unknown_typ__2 | Motor, epileptic spasms | 3 | unknown_typ__3 | Nonmotor, behavioral arrest | 4 | unknown_typ__4 | Unclassified     |   |               |                 |   |            |                                 |
| 1   | unknown_typ__1                                                                   | Motor, tonic-clonic                                               |                                                                                                                                                                                                                                                                                                                                                                                                                                                                    |   |                |                     |    |                |                         |   |                |                             |   |                |                  |   |               |                 |   |            |                                 |
| 2   | unknown_typ__2                                                                   | Motor, epileptic spasms                                           |                                                                                                                                                                                                                                                                                                                                                                                                                                                                    |   |                |                     |    |                |                         |   |                |                             |   |                |                  |   |               |                 |   |            |                                 |
| 3   | unknown_typ__3                                                                   | Nonmotor, behavioral arrest                                       |                                                                                                                                                                                                                                                                                                                                                                                                                                                                    |   |                |                     |    |                |                         |   |                |                             |   |                |                  |   |               |                 |   |            |                                 |
| 4   | unknown_typ__4                                                                   | Unclassified                                                      |                                                                                                                                                                                                                                                                                                                                                                                                                                                                    |   |                |                     |    |                |                         |   |                |                             |   |                |                  |   |               |                 |   |            |                                 |

|     |                                                                         |                                                                                    |                                                                                                                                                                                                                                                                                                                                                                                                                                                                                                                                                                                                                                                                      |   |                 |              |    |                 |         |   |                 |       |   |                 |           |   |                 |                        |   |                 |                  |   |                 |        |   |                 |        |   |                 |                 |
|-----|-------------------------------------------------------------------------|------------------------------------------------------------------------------------|----------------------------------------------------------------------------------------------------------------------------------------------------------------------------------------------------------------------------------------------------------------------------------------------------------------------------------------------------------------------------------------------------------------------------------------------------------------------------------------------------------------------------------------------------------------------------------------------------------------------------------------------------------------------|---|-----------------|--------------|----|-----------------|---------|---|-----------------|-------|---|-----------------|-----------|---|-----------------|------------------------|---|-----------------|------------------|---|-----------------|--------|---|-----------------|--------|---|-----------------|-----------------|
| 244 | [ <b>post_spasms</b> ]                                                  | Section Header: <i>Seizures post spasms</i><br>Seizures (other types) post spasms? | radio<br><table border="1" data-bbox="1354 123 1528 282"> <tr><td>1</td><td>Yes</td></tr> <tr><td>2</td><td>No</td></tr> <tr><td>9</td><td>Unknown</td></tr> </table>                                                                                                                                                                                                                                                                                                                                                                                                                                                                                                | 1 | Yes             | 2            | No | 9               | Unknown |   |                 |       |   |                 |           |   |                 |                        |   |                 |                  |   |                 |        |   |                 |        |   |                 |                 |
| 1   | Yes                                                                     |                                                                                    |                                                                                                                                                                                                                                                                                                                                                                                                                                                                                                                                                                                                                                                                      |   |                 |              |    |                 |         |   |                 |       |   |                 |           |   |                 |                        |   |                 |                  |   |                 |        |   |                 |        |   |                 |                 |
| 2   | No                                                                      |                                                                                    |                                                                                                                                                                                                                                                                                                                                                                                                                                                                                                                                                                                                                                                                      |   |                 |              |    |                 |         |   |                 |       |   |                 |           |   |                 |                        |   |                 |                  |   |                 |        |   |                 |        |   |                 |                 |
| 9   | Unknown                                                                 |                                                                                    |                                                                                                                                                                                                                                                                                                                                                                                                                                                                                                                                                                                                                                                                      |   |                 |              |    |                 |         |   |                 |       |   |                 |           |   |                 |                        |   |                 |                  |   |                 |        |   |                 |        |   |                 |                 |
| 245 | [ <b>p_gen_mot</b> ]<br>Show the field ONLY if:<br>[post_spasms] = '1'  | Did they have generalized onset seizures, motor? (post-spasms)                     | radio<br><table border="1" data-bbox="1354 334 1528 493"> <tr><td>1</td><td>Yes</td></tr> <tr><td>2</td><td>No</td></tr> <tr><td>9</td><td>Unknown</td></tr> </table>                                                                                                                                                                                                                                                                                                                                                                                                                                                                                                | 1 | Yes             | 2            | No | 9               | Unknown |   |                 |       |   |                 |           |   |                 |                        |   |                 |                  |   |                 |        |   |                 |        |   |                 |                 |
| 1   | Yes                                                                     |                                                                                    |                                                                                                                                                                                                                                                                                                                                                                                                                                                                                                                                                                                                                                                                      |   |                 |              |    |                 |         |   |                 |       |   |                 |           |   |                 |                        |   |                 |                  |   |                 |        |   |                 |        |   |                 |                 |
| 2   | No                                                                      |                                                                                    |                                                                                                                                                                                                                                                                                                                                                                                                                                                                                                                                                                                                                                                                      |   |                 |              |    |                 |         |   |                 |       |   |                 |           |   |                 |                        |   |                 |                  |   |                 |        |   |                 |        |   |                 |                 |
| 9   | Unknown                                                                 |                                                                                    |                                                                                                                                                                                                                                                                                                                                                                                                                                                                                                                                                                                                                                                                      |   |                 |              |    |                 |         |   |                 |       |   |                 |           |   |                 |                        |   |                 |                  |   |                 |        |   |                 |        |   |                 |                 |
| 246 | [ <b>p_gen_mottyp</b> ]<br>Show the field ONLY if:<br>[p_gen_mot] = '1' | If yes, check all that apply:                                                      | checkbox<br><table border="1" data-bbox="1354 550 1919 1029"> <tr><td>1</td><td>p_gen_mottyp__1</td><td>Tonic-clonic</td></tr> <tr><td>2</td><td>p_gen_mottyp__2</td><td>Clonic</td></tr> <tr><td>3</td><td>p_gen_mottyp__3</td><td>Tonic</td></tr> <tr><td>4</td><td>p_gen_mottyp__4</td><td>Myoclonic</td></tr> <tr><td>5</td><td>p_gen_mottyp__5</td><td>Myoclonic-tonic-clonic</td></tr> <tr><td>6</td><td>p_gen_mottyp__6</td><td>Myoclonic-atonic</td></tr> <tr><td>7</td><td>p_gen_mottyp__7</td><td>Atonic</td></tr> <tr><td>8</td><td>p_gen_mottyp__8</td><td>Spasms</td></tr> <tr><td>9</td><td>p_gen_mottyp__9</td><td>Unknown subtype</td></tr> </table> | 1 | p_gen_mottyp__1 | Tonic-clonic | 2  | p_gen_mottyp__2 | Clonic  | 3 | p_gen_mottyp__3 | Tonic | 4 | p_gen_mottyp__4 | Myoclonic | 5 | p_gen_mottyp__5 | Myoclonic-tonic-clonic | 6 | p_gen_mottyp__6 | Myoclonic-atonic | 7 | p_gen_mottyp__7 | Atonic | 8 | p_gen_mottyp__8 | Spasms | 9 | p_gen_mottyp__9 | Unknown subtype |
| 1   | p_gen_mottyp__1                                                         | Tonic-clonic                                                                       |                                                                                                                                                                                                                                                                                                                                                                                                                                                                                                                                                                                                                                                                      |   |                 |              |    |                 |         |   |                 |       |   |                 |           |   |                 |                        |   |                 |                  |   |                 |        |   |                 |        |   |                 |                 |
| 2   | p_gen_mottyp__2                                                         | Clonic                                                                             |                                                                                                                                                                                                                                                                                                                                                                                                                                                                                                                                                                                                                                                                      |   |                 |              |    |                 |         |   |                 |       |   |                 |           |   |                 |                        |   |                 |                  |   |                 |        |   |                 |        |   |                 |                 |
| 3   | p_gen_mottyp__3                                                         | Tonic                                                                              |                                                                                                                                                                                                                                                                                                                                                                                                                                                                                                                                                                                                                                                                      |   |                 |              |    |                 |         |   |                 |       |   |                 |           |   |                 |                        |   |                 |                  |   |                 |        |   |                 |        |   |                 |                 |
| 4   | p_gen_mottyp__4                                                         | Myoclonic                                                                          |                                                                                                                                                                                                                                                                                                                                                                                                                                                                                                                                                                                                                                                                      |   |                 |              |    |                 |         |   |                 |       |   |                 |           |   |                 |                        |   |                 |                  |   |                 |        |   |                 |        |   |                 |                 |
| 5   | p_gen_mottyp__5                                                         | Myoclonic-tonic-clonic                                                             |                                                                                                                                                                                                                                                                                                                                                                                                                                                                                                                                                                                                                                                                      |   |                 |              |    |                 |         |   |                 |       |   |                 |           |   |                 |                        |   |                 |                  |   |                 |        |   |                 |        |   |                 |                 |
| 6   | p_gen_mottyp__6                                                         | Myoclonic-atonic                                                                   |                                                                                                                                                                                                                                                                                                                                                                                                                                                                                                                                                                                                                                                                      |   |                 |              |    |                 |         |   |                 |       |   |                 |           |   |                 |                        |   |                 |                  |   |                 |        |   |                 |        |   |                 |                 |
| 7   | p_gen_mottyp__7                                                         | Atonic                                                                             |                                                                                                                                                                                                                                                                                                                                                                                                                                                                                                                                                                                                                                                                      |   |                 |              |    |                 |         |   |                 |       |   |                 |           |   |                 |                        |   |                 |                  |   |                 |        |   |                 |        |   |                 |                 |
| 8   | p_gen_mottyp__8                                                         | Spasms                                                                             |                                                                                                                                                                                                                                                                                                                                                                                                                                                                                                                                                                                                                                                                      |   |                 |              |    |                 |         |   |                 |       |   |                 |           |   |                 |                        |   |                 |                  |   |                 |        |   |                 |        |   |                 |                 |
| 9   | p_gen_mottyp__9                                                         | Unknown subtype                                                                    |                                                                                                                                                                                                                                                                                                                                                                                                                                                                                                                                                                                                                                                                      |   |                 |              |    |                 |         |   |                 |       |   |                 |           |   |                 |                        |   |                 |                  |   |                 |        |   |                 |        |   |                 |                 |
| 247 | [ <b>p_gen_nmot</b> ]<br>Show the field ONLY if:<br>[post_spasms] = '1' | Did they have generalized onset seizures, nonmotor (absence)? (post-spasms)        | radio<br><table border="1" data-bbox="1354 1081 1528 1240"> <tr><td>1</td><td>Yes</td></tr> <tr><td>2</td><td>No</td></tr> <tr><td>9</td><td>Unknown</td></tr> </table>                                                                                                                                                                                                                                                                                                                                                                                                                                                                                              | 1 | Yes             | 2            | No | 9               | Unknown |   |                 |       |   |                 |           |   |                 |                        |   |                 |                  |   |                 |        |   |                 |        |   |                 |                 |
| 1   | Yes                                                                     |                                                                                    |                                                                                                                                                                                                                                                                                                                                                                                                                                                                                                                                                                                                                                                                      |   |                 |              |    |                 |         |   |                 |       |   |                 |           |   |                 |                        |   |                 |                  |   |                 |        |   |                 |        |   |                 |                 |
| 2   | No                                                                      |                                                                                    |                                                                                                                                                                                                                                                                                                                                                                                                                                                                                                                                                                                                                                                                      |   |                 |              |    |                 |         |   |                 |       |   |                 |           |   |                 |                        |   |                 |                  |   |                 |        |   |                 |        |   |                 |                 |
| 9   | Unknown                                                                 |                                                                                    |                                                                                                                                                                                                                                                                                                                                                                                                                                                                                                                                                                                                                                                                      |   |                 |              |    |                 |         |   |                 |       |   |                 |           |   |                 |                        |   |                 |                  |   |                 |        |   |                 |        |   |                 |                 |

|     |                                                                    |                                                               |                                                                                                                                                                                                                                                                                                                                                                                                                                                                            |   |                  |                     |    |                  |                         |   |                  |                             |   |                  |                  |   |                  |                 |   |              |                                 |
|-----|--------------------------------------------------------------------|---------------------------------------------------------------|----------------------------------------------------------------------------------------------------------------------------------------------------------------------------------------------------------------------------------------------------------------------------------------------------------------------------------------------------------------------------------------------------------------------------------------------------------------------------|---|------------------|---------------------|----|------------------|-------------------------|---|------------------|-----------------------------|---|------------------|------------------|---|------------------|-----------------|---|--------------|---------------------------------|
| 248 | [ p_gen_nmottyp ]<br>Show the field ONLY if:<br>[p_gen_nmot] = '1' | If yes, check all that apply:                                 | checkbox<br><table border="1"> <tr> <td>1</td> <td>p_gen_nmottyp__1</td> <td>Typical</td> </tr> <tr> <td>2</td> <td>p_gen_nmottyp__2</td> <td>Atypical</td> </tr> <tr> <td>3</td> <td>p_gen_nmottyp__3</td> <td>Myoclonic</td> </tr> <tr> <td>4</td> <td>p_gen_nmottyp__4</td> <td>Eyelid myoclonic</td> </tr> <tr> <td>5</td> <td>p_gen_nmottyp__5</td> <td>Unknown subtype</td> </tr> </table>                                                                           | 1 | p_gen_nmottyp__1 | Typical             | 2  | p_gen_nmottyp__2 | Atypical                | 3 | p_gen_nmottyp__3 | Myoclonic                   | 4 | p_gen_nmottyp__4 | Eyelid myoclonic | 5 | p_gen_nmottyp__5 | Unknown subtype |   |              |                                 |
| 1   | p_gen_nmottyp__1                                                   | Typical                                                       |                                                                                                                                                                                                                                                                                                                                                                                                                                                                            |   |                  |                     |    |                  |                         |   |                  |                             |   |                  |                  |   |                  |                 |   |              |                                 |
| 2   | p_gen_nmottyp__2                                                   | Atypical                                                      |                                                                                                                                                                                                                                                                                                                                                                                                                                                                            |   |                  |                     |    |                  |                         |   |                  |                             |   |                  |                  |   |                  |                 |   |              |                                 |
| 3   | p_gen_nmottyp__3                                                   | Myoclonic                                                     |                                                                                                                                                                                                                                                                                                                                                                                                                                                                            |   |                  |                     |    |                  |                         |   |                  |                             |   |                  |                  |   |                  |                 |   |              |                                 |
| 4   | p_gen_nmottyp__4                                                   | Eyelid myoclonic                                              |                                                                                                                                                                                                                                                                                                                                                                                                                                                                            |   |                  |                     |    |                  |                         |   |                  |                             |   |                  |                  |   |                  |                 |   |              |                                 |
| 5   | p_gen_nmottyp__5                                                   | Unknown subtype                                               |                                                                                                                                                                                                                                                                                                                                                                                                                                                                            |   |                  |                     |    |                  |                         |   |                  |                             |   |                  |                  |   |                  |                 |   |              |                                 |
| 249 | [ p_foc_sz ]<br>Show the field ONLY if:<br>[post_spasms] = '1'     | Did they have focal seizures? (post-spasms)                   | radio<br><table border="1"> <tr> <td>1</td> <td>Yes</td> </tr> <tr> <td>2</td> <td>No</td> </tr> <tr> <td>9</td> <td>Unknown</td> </tr> </table>                                                                                                                                                                                                                                                                                                                           | 1 | Yes              | 2                   | No | 9                | Unknown                 |   |                  |                             |   |                  |                  |   |                  |                 |   |              |                                 |
| 1   | Yes                                                                |                                                               |                                                                                                                                                                                                                                                                                                                                                                                                                                                                            |   |                  |                     |    |                  |                         |   |                  |                             |   |                  |                  |   |                  |                 |   |              |                                 |
| 2   | No                                                                 |                                                               |                                                                                                                                                                                                                                                                                                                                                                                                                                                                            |   |                  |                     |    |                  |                         |   |                  |                             |   |                  |                  |   |                  |                 |   |              |                                 |
| 9   | Unknown                                                            |                                                               |                                                                                                                                                                                                                                                                                                                                                                                                                                                                            |   |                  |                     |    |                  |                         |   |                  |                             |   |                  |                  |   |                  |                 |   |              |                                 |
| 250 | [ p_foc_typ ]<br>Show the field ONLY if:<br>[p_foc_sz] = '1'       | If yes, check all that apply:                                 | checkbox<br><table border="1"> <tr> <td>1</td> <td>p_foc_typ__1</td> <td>Aware</td> </tr> <tr> <td>2</td> <td>p_foc_typ__2</td> <td>Impaired awareness</td> </tr> <tr> <td>3</td> <td>p_foc_typ__3</td> <td>Unknown subtype</td> </tr> <tr> <td>4</td> <td>p_foc_typ__4</td> <td>Motor onset</td> </tr> <tr> <td>5</td> <td>p_foc_typ__5</td> <td>Non-motor onset</td> </tr> <tr> <td>6</td> <td>p_foc_typ__6</td> <td>Focal to bilateral tonic clonic</td> </tr> </table> | 1 | p_foc_typ__1     | Aware               | 2  | p_foc_typ__2     | Impaired awareness      | 3 | p_foc_typ__3     | Unknown subtype             | 4 | p_foc_typ__4     | Motor onset      | 5 | p_foc_typ__5     | Non-motor onset | 6 | p_foc_typ__6 | Focal to bilateral tonic clonic |
| 1   | p_foc_typ__1                                                       | Aware                                                         |                                                                                                                                                                                                                                                                                                                                                                                                                                                                            |   |                  |                     |    |                  |                         |   |                  |                             |   |                  |                  |   |                  |                 |   |              |                                 |
| 2   | p_foc_typ__2                                                       | Impaired awareness                                            |                                                                                                                                                                                                                                                                                                                                                                                                                                                                            |   |                  |                     |    |                  |                         |   |                  |                             |   |                  |                  |   |                  |                 |   |              |                                 |
| 3   | p_foc_typ__3                                                       | Unknown subtype                                               |                                                                                                                                                                                                                                                                                                                                                                                                                                                                            |   |                  |                     |    |                  |                         |   |                  |                             |   |                  |                  |   |                  |                 |   |              |                                 |
| 4   | p_foc_typ__4                                                       | Motor onset                                                   |                                                                                                                                                                                                                                                                                                                                                                                                                                                                            |   |                  |                     |    |                  |                         |   |                  |                             |   |                  |                  |   |                  |                 |   |              |                                 |
| 5   | p_foc_typ__5                                                       | Non-motor onset                                               |                                                                                                                                                                                                                                                                                                                                                                                                                                                                            |   |                  |                     |    |                  |                         |   |                  |                             |   |                  |                  |   |                  |                 |   |              |                                 |
| 6   | p_foc_typ__6                                                       | Focal to bilateral tonic clonic                               |                                                                                                                                                                                                                                                                                                                                                                                                                                                                            |   |                  |                     |    |                  |                         |   |                  |                             |   |                  |                  |   |                  |                 |   |              |                                 |
| 251 | [ p_unknown ]<br>Show the field ONLY if:<br>[post_spasms] = '1'    | Did they have the seizures of an unknown onset? (post-spasms) | radio<br><table border="1"> <tr> <td>1</td> <td>Yes</td> </tr> <tr> <td>2</td> <td>No</td> </tr> <tr> <td>9</td> <td>Unknown</td> </tr> </table>                                                                                                                                                                                                                                                                                                                           | 1 | Yes              | 2                   | No | 9                | Unknown                 |   |                  |                             |   |                  |                  |   |                  |                 |   |              |                                 |
| 1   | Yes                                                                |                                                               |                                                                                                                                                                                                                                                                                                                                                                                                                                                                            |   |                  |                     |    |                  |                         |   |                  |                             |   |                  |                  |   |                  |                 |   |              |                                 |
| 2   | No                                                                 |                                                               |                                                                                                                                                                                                                                                                                                                                                                                                                                                                            |   |                  |                     |    |                  |                         |   |                  |                             |   |                  |                  |   |                  |                 |   |              |                                 |
| 9   | Unknown                                                            |                                                               |                                                                                                                                                                                                                                                                                                                                                                                                                                                                            |   |                  |                     |    |                  |                         |   |                  |                             |   |                  |                  |   |                  |                 |   |              |                                 |
| 252 | [ p_unknown_typ ]<br>Show the field ONLY if:<br>[p_unknown] = '1'  | If yes, check all that apply:                                 | checkbox<br><table border="1"> <tr> <td>1</td> <td>p_unknown_typ__1</td> <td>Motor, tonic-clonic</td> </tr> <tr> <td>2</td> <td>p_unknown_typ__2</td> <td>Motor, epileptic spasms</td> </tr> <tr> <td>3</td> <td>p_unknown_typ__3</td> <td>Nonmotor, behavioral arrest</td> </tr> <tr> <td>4</td> <td>p_unknown_typ__4</td> <td>Unclassified</td> </tr> </table>                                                                                                           | 1 | p_unknown_typ__1 | Motor, tonic-clonic | 2  | p_unknown_typ__2 | Motor, epileptic spasms | 3 | p_unknown_typ__3 | Nonmotor, behavioral arrest | 4 | p_unknown_typ__4 | Unclassified     |   |                  |                 |   |              |                                 |
| 1   | p_unknown_typ__1                                                   | Motor, tonic-clonic                                           |                                                                                                                                                                                                                                                                                                                                                                                                                                                                            |   |                  |                     |    |                  |                         |   |                  |                             |   |                  |                  |   |                  |                 |   |              |                                 |
| 2   | p_unknown_typ__2                                                   | Motor, epileptic spasms                                       |                                                                                                                                                                                                                                                                                                                                                                                                                                                                            |   |                  |                     |    |                  |                         |   |                  |                             |   |                  |                  |   |                  |                 |   |              |                                 |
| 3   | p_unknown_typ__3                                                   | Nonmotor, behavioral arrest                                   |                                                                                                                                                                                                                                                                                                                                                                                                                                                                            |   |                  |                     |    |                  |                         |   |                  |                             |   |                  |                  |   |                  |                 |   |              |                                 |
| 4   | p_unknown_typ__4                                                   | Unclassified                                                  |                                                                                                                                                                                                                                                                                                                                                                                                                                                                            |   |                  |                     |    |                  |                         |   |                  |                             |   |                  |                  |   |                  |                 |   |              |                                 |

|     |                            |                                                 |                                                                                                                                                                                                                      |   |            |   |            |   |          |   |           |   |         |
|-----|----------------------------|-------------------------------------------------|----------------------------------------------------------------------------------------------------------------------------------------------------------------------------------------------------------------------|---|------------|---|------------|---|----------|---|-----------|---|---------|
| 253 | [ <i>frew_sz</i> ]         | Frequency of seizures at last follow-up?        | radio<br><table border="1"><tr><td>1</td><td>Daily</td></tr><tr><td>2</td><td>Weekly</td></tr><tr><td>3</td><td>Monthly</td></tr><tr><td>4</td><td>&lt; Monthly</td></tr><tr><td>9</td><td>Unknown</td></tr></table> | 1 | Daily      | 2 | Weekly     | 3 | Monthly  | 4 | < Monthly | 9 | Unknown |
| 1   | Daily                      |                                                 |                                                                                                                                                                                                                      |   |            |   |            |   |          |   |           |   |         |
| 2   | Weekly                     |                                                 |                                                                                                                                                                                                                      |   |            |   |            |   |          |   |           |   |         |
| 3   | Monthly                    |                                                 |                                                                                                                                                                                                                      |   |            |   |            |   |          |   |           |   |         |
| 4   | < Monthly                  |                                                 |                                                                                                                                                                                                                      |   |            |   |            |   |          |   |           |   |         |
| 9   | Unknown                    |                                                 |                                                                                                                                                                                                                      |   |            |   |            |   |          |   |           |   |         |
| 254 | [ <i>spasms_complete</i> ] | Section Header: <i>Form Status</i><br>Complete? | dropdown<br><table border="1"><tr><td>0</td><td>Incomplete</td></tr><tr><td>1</td><td>Unverified</td></tr><tr><td>2</td><td>Complete</td></tr></table>                                                               | 0 | Incomplete | 1 | Unverified | 2 | Complete |   |           |   |         |
| 0   | Incomplete                 |                                                 |                                                                                                                                                                                                                      |   |            |   |            |   |          |   |           |   |         |
| 1   | Unverified                 |                                                 |                                                                                                                                                                                                                      |   |            |   |            |   |          |   |           |   |         |
| 2   | Complete                   |                                                 |                                                                                                                                                                                                                      |   |            |   |            |   |          |   |           |   |         |
